# Supplementary material for: Base-mediated intramolecular one-pot double-cyclization of epoxide-tethered 2-fluorobenzenesulfonamides: an avenue to 1,4-benzoxazine-fused benzothiaoxazepine-1,1-dioxides
Source: Royal Society of Chemistry journal article supplement (doi:10.1039/c9ob02377a), 2019-12-03
Supplement: c9ob02377a1.pdf [file c9ob02377a1.pdf]

## Electronic Supplementary Information

# Base-Induced Intramolecular Epoxide Ring-Opening by 2-Fluoroarenesulfonamides: An Avenue to Fused 1,4-Benzoxazine-Benzosultam Hybrids via One-Pot Double Cyclization

Jonali Das, Biraj Jyoti Borah and Sajal Kumar Das\*

*Department of Chemical Sciences, Tezpur University, Napaam, Tezpur, Assam, India-784028*

\*E-mail: [sajalkd@tezu.ernet.in](mailto:sajalkd@tezu.ernet.in)

### Table of Contents

|                                                                                                                      |     |
|----------------------------------------------------------------------------------------------------------------------|-----|
| 1. General information.....                                                                                          | S2  |
| 2. Synthesis of epoxide substrates.....                                                                              | S2  |
| 3. Double cyclization reaction.....                                                                                  | S19 |
| 4. Synthesis of indoline-fused benzothioxazepine-1,1-dioxides .....                                                  | S28 |
| 5. Synthesis of 1,4-benzoxazine -fused benzothioxazepine-1,1-dioxides<br>Using preformed epoxide building block..... | S32 |
| 6. X ray crystallography data.....                                                                                   | S33 |
| 7. Copies of <sup>1</sup> H and <sup>13</sup> C NMR spectra of all new compounds.....                                | S35 |
| 8. Copies of <sup>19</sup> F spectra of selected final compounds.....                                                | S81 |
| 9. HRMS data of final compounds.....                                                                                 | S84 |

## 1. General information

All commercially available reagents were used without further purification. All dry reactions were carried out in oven-dried glassware and under nitrogen atmosphere. Solvents used in reactions were distilled over appropriate drying agents prior to use. Thin-layer chromatography (TLC) was performed on pre-coated Merck silica gel plates (60 F254). Compounds were visualized with UV light ( $\lambda = 254$  nm) and/or by immersion in an ethanolic vanillin solution or by immersion in  $\text{KMnO}_4$  solution followed by heating. Column chromatography was performed using silica gel (60–120 mesh) procured from Merck using freshly distilled solvents. Melting points were determined with a Buchi-535 apparatus and are not corrected. Perkin Elmer 20 analyzer was utilized for elemental analysis of all compounds.  $^1\text{H}$  NMR,  $^{13}\text{C}$  NMR and  $^{19}\text{F}$  spectra were run on JEOL 400 MHz spectrometer in  $\text{CDCl}_3$  as solvent. Chemical shifts are expressed in  $\delta$  ppm relative to tetramethylsilane (TMS, 0.0 ppm) or residual chloroform ( $\text{CHCl}_3$ ) as internal reference for  $^1\text{H}$  ( $\delta = 7.27$  ppm) and  $^{13}\text{C}$  ( $\delta = 77.0$  ppm). The following abbreviations were used to describe the NMR multiplicities: br = broad, s = singlet, d = doublet, t = triplet, q = quartet, dd = doublet of doublets, ddd = doublet of doublets of doublets, td = triplet of doublets, dt = doublet of triplets, tt = triplet of triplets, dq = doublet of quartets, qd = quartet of doublets, and m = multiplet. All spectra were recorded at 25 °C. Coupling constants ( $J$  values) are given in hertz (Hz). HRMS data were recorded by electron spray ionization with a Q-TOF mass analyzer.

## 2. Synthesis of epoxide substrates 5

### General procedure A: synthesis of *N*-(2-(Allyloxy)aryl)-2-fluorobenzenesulfonamides

12

#### Step-I: *O*-allylation/prenylation of 2-nitrophenols 11

A suspension of appropriate 2-nitrophenol **11** (1 mmol, 1.0 equiv), anhydrous  $\text{K}_2\text{CO}_3$  (276 mg, 2.0 mmol, 2.0 equiv), and allyl bromide (182 mg, 1.5 mmol, 1.5 equiv) or prenyl bromide (224 mg, 1.5 mmol, 1.5 equiv) in acetone (10 mL) was heated at 65 °C for 12 h.

The resulting suspension was filtered through a pad of Celite which was washed with acetone. The filtrate was evaporated and the residue was filtered through a short pad of silica gel to remove the base-line impurities. The filtrate was concentrated under reduced pressure to get the corresponding *O*-allylated/prenylated product which was used for the next step without further purification and characterization.

### **Step-II: Chemoselective reduction of the NO<sub>2</sub> group of the resulting *O*-allylated/prenylated products**

Fe (279 mg, 5.0 mmol) powder was added to a solution of the resulting *O*-allylated/prenylated product (obtained from the first step) and NH<sub>4</sub>Cl (160 mg, 3.0 mmol) in EtOH (15 mL) and H<sub>2</sub>O (5 mL) and the resulting mixture was then refluxed for 2 h under nitrogen atmosphere. After cooling to rt, the reaction mixture was filtered through a short pad of celite and the residue was washed by ethyl acetate (10 mL). The combined filtrate was concentrated under reduced pressure to get a yellow residue which was re-dissolved in ethyl acetate (20 mL) and H<sub>2</sub>O (10 mL). The organic layer was separated, washed by brine (10 mL), dried (MgSO<sub>4</sub>), and filtered. Evaporation of the filtrate under reduced pressure provided the corresponding crude aniline which was immediately used for the next step without further purification and characterization.

### **Step-III: 2-Fluoroarenesulfonylation of resulting crude anilines**

The crude product thus obtained was dissolved in pyridine (5 mL) at 0 °C. A solution of appropriate 2-fluoroarenesulfonyl chloride (1.2 eq.) in pyridine (2 mL) was then added slowly at 0 °C. The mixture was stirred for 12 h at room temperature. The reaction was quenched by adding 5N HCl solution at 0 °C. The mixture was extracted with CH<sub>2</sub>Cl<sub>2</sub> (20 mL). The organic layer was separated, washed with brine, dried (MgSO<sub>4</sub>), filtered, and evaporated under reduced pressure. The residue was purified by column chromatography on silica gel, using hexanes/ethyl acetate mixtures as eluent.

### ***N*-(2-(Allyloxy)phenyl)-2-fluorobenzenesulfonamide (12a)**

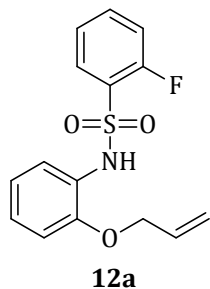

White solid (mp: 115-116 °C). Yield: 75% (230 mg). <sup>1</sup>H NMR (400 MHz, CDCl<sub>3</sub>): δ 7.84-7.80 (m, 1H), 7.53-7.48 (m, 2H), 7.39 (s, 1H), 7.19-7.11 (m, 2H), 7.02-6.98 (m, 1H), 6.86 (t, *J* = 7.8 Hz, 1H), 6.75 (d, *J* = 8.2 Hz, 1H), 5.96 (ddd, *J* = 22.4, 11.0, 5.5 Hz, 1H), 5.33-5.28 (m, 2H), 4.45 (d, *J* = 5.5 Hz, 2H). <sup>13</sup>C NMR (CDCl<sub>3</sub>, 100 MHz): δ 158.9 (d, *J* = 255.9 Hz), 148.5, 135.2 (d, *J* = 8.6 Hz), 132.3, 130.9, 127.1 (d, *J* = 13.4 Hz), 125.43, 125.47, 124.1 (d, *J* = 3.8 Hz), 121.1, 118.3, 116.8 (d, *J* = 21.0 Hz), 111.7, 69.4. Anal. calcd. for C<sub>15</sub>H<sub>14</sub>FNO<sub>3</sub>S: C, 58.62; H, 4.59; N, 4.56; found: C, 58.72; H, 4.67; N, 4.51.

***N*-(2-(Allyloxy)phenyl)-2,4-difluorobenzenesulfonamide (12b)**

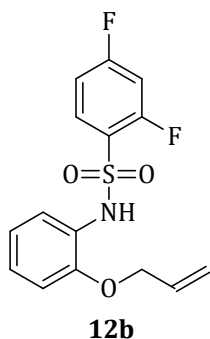

White solid (mp: 121-122 °C). Yield: 74% (241 mg). <sup>1</sup>H NMR (400 MHz, CDCl<sub>3</sub>): δ 7.85-7.79 (m, 1H), 7.49 (dd, *J* = 7.8, 0.9 Hz, 1H), 7.36 (br s, 1H), 7.03 (td, *J* = 8.2, 1.3 Hz, 1H), 6.90-6.84 (m, 3H), 6.76 (d, *J* = 8.2 Hz, 1H), 5.97 (ddd, *J* = 22.4, 10.5, 5.5 Hz, 1H), 5.33-5.29 (m, 2H), 4.47 (d, *J* = 5.5 Hz, 2H). Anal. calcd. for C<sub>15</sub>H<sub>13</sub>F<sub>2</sub>NO<sub>3</sub>S: C, 55.38; H, 4.03; N, 4.31; found: C, 55.21; H, 4.10; N, 4.36.

***N*-(2-(Allyloxy)phenyl)-2,6-difluorobenzenesulfonamide (12c)**

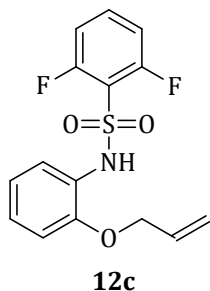

White solid (mp: 113-114 °C). Yield: 71% (231 mg). <sup>1</sup>H NMR (400 MHz, CDCl<sub>3</sub>): δ 7.61-7.57 (m, 2H), 7.44 (tt, *J* = 8.2, 5.9 Hz, 1H), 7.03 (td, *J* = 7.8, 1.3 Hz, 1H), 6.96-6.89 (m, 3H), 6.79 (dd, *J* = 8.2, 0.9 Hz, 1H), 5.97 (ddd, *J* = 22.4, 10.5, 5.5 Hz, 1H), 5.35-5.30 (m, 2H), 4.49 (d, *J* = 5.5 Hz, 2H). Anal. calcd. for C<sub>15</sub>H<sub>13</sub>F<sub>2</sub>NO<sub>3</sub>S: C, 55.38; H, 4.03; N, 4.31; found: C, 55.49; H, 4.16; N, 4.38.

**2-Fluoro-N-(2-((3-methylbut-2-en-1-yl)oxy)phenyl)benzenesulfonamide (12d)**

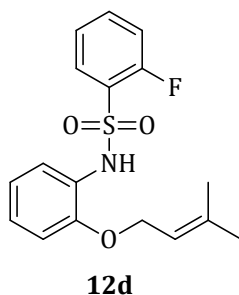

White solid (mp: 107-108 °C). Yield: 75% (251 mg). <sup>1</sup>H NMR (400 MHz, CDCl<sub>3</sub>): δ 7.85-7.81 (m, 1H), 7.53-7.42 (m, 3H), 7.19-7.09 (m, 2H), 7.01-6.97 (m, 1H), 6.84 (t, *J* = 7.8 Hz, 1H), 6.76 (d, *J* = 7.8 Hz, 1H), 5.36 (t, *J* = 6.4 Hz, 1H), 4.43 (d, *J* = 6.4 Hz, 2H), 1.81 (s, 3H), 1.71 (s, 3H). <sup>13</sup>C NMR (CDCl<sub>3</sub>, 100 MHz): δ 159.0 (d, *J* = 255.9 Hz), 148.7, 138.6, 135.1 (d, *J* = 8.6 Hz), 130.9, 127.2 (d, *J* = 13.4 Hz), 125.6, 125.2, 124.1 (d, *J* = 3.8 Hz), 120.8, 120.6, 118.9, 116.8 (d, *J* = 21.0 Hz), 111.5, 65.3, 25.8, 18.2. Anal. calcd. for C<sub>17</sub>H<sub>18</sub>FNO<sub>3</sub>S: C, 60.88; H, 5.41; N, 4.18; found: C, 60.71; H, 5.48; N, 4.07.

**2,4-Difluoro-N-(2-((3-methylbut-2-en-1-yl)oxy)phenyl)benzenesulfonamide (12e)**

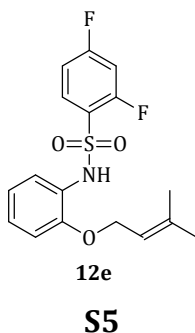

White solid (mp: 111-112 °C). Yield: 73% (258 mg). <sup>1</sup>H NMR (400 MHz, CDCl<sub>3</sub>): δ 7.85-7.79 (m, 1H), 7.47 (dd, *J* = 8.2, 1.3 Hz, 1H), 7.37 (br s, 1H), 7.02 (td, *J* = 8.2, 1.3 Hz, 1H), 6.90-6.83 (m, 3H), 6.77 (d, *J* = 7.8 Hz, 1H), 5.35 (t, *J* = 6.4 Hz, 1H), 4.43 (d, *J* = 6.8 Hz, 2H), 1.82 (s, 3H), 1.72 (s, 3H). Anal. calcd. for C<sub>17</sub>H<sub>17</sub>F<sub>2</sub>NO<sub>3</sub>S: C, 57.78; H, 4.85; N, 3.96; found: C, 57.59; H, 4.76; N, 3.91.

**2,6-Difluoro-*N*-(2-((3-methylbut-2-en-1-yl)oxy)phenyl)benzenesulfonamide (12f)**

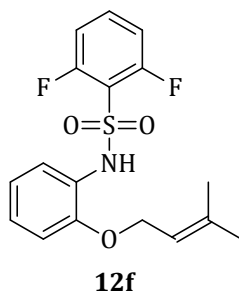

White solid (mp: 101-102 °C). Yield: 70% (247 mg). <sup>1</sup>H NMR (400 MHz, CDCl<sub>3</sub>): δ 7.60-7.57 (m, 2H), 7.48-7.41 (m, 1H), 7.03 (t, *J* = 7.8 Hz, 1H), 6.95-6.87 (m, 3H), 6.79 (d, *J* = 8.2 Hz, 1H), 5.37 (t, *J* = 6.4 Hz, 1H), 4.45 (d, *J* = 6.4 Hz, 2H), 1.82 (s, 3H), 1.72 (s, 3H). Anal. calcd. for C<sub>17</sub>H<sub>17</sub>F<sub>2</sub>NO<sub>3</sub>S: C, 57.78; H, 4.85; N, 3.96; found: C, 57.87; H, 4.79; N, 4.06.

***N*-(2-(Allyloxy)-5-methylphenyl)-2-fluorobenzenesulfonamide (12g)**

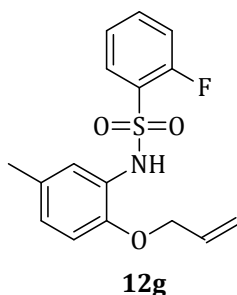

White solid (mp: 106-107 °C). Yield: 69% (222 mg). <sup>1</sup>H NMR (400 MHz, CDCl<sub>3</sub>): δ 7.82 (t, *J* = 7.3 Hz, 1H), 7.53-7.49 (m, 1H), 7.33 (m, 2H), 7.19-7.11 (m, 2H), 6.79 (d, *J* = 8.2 Hz, 1H), 6.63 (d, *J* = 8.2 Hz, 1H), 5.94 (ddd, *J* = 22.4, 10.9, 5.5 Hz, 1H), 5.31-5.26 (m, 2H), 4.41 (d, *J* = 5.5 Hz, 2H), 2.23 (s, 3H). <sup>13</sup>C NMR (CDCl<sub>3</sub>, 100 MHz): δ 159.0 (d, *J* = 255.9 Hz), 146.4, 135.1 (d, *J* = 8.6 Hz), 132.5, 130.9, 130.7, 127.2 (d, *J* = 13.4 Hz), 125.7, 125.1, 124.1 (d, *J* = 3.8 Hz), 121.8, 118.1, 116.8 (d, *J* = 21.1 Hz), 111.6, 69.5, 20.7. Anal. calcd. for C<sub>16</sub>H<sub>16</sub>FNO<sub>3</sub>S: C, 59.80; H, 5.02; N, 4.36; found: C, 59.98; H, 5.07; N, 4.25.

**2-Fluoro-N-(4-methyl-2-((3-methylbut-2-en-1-yl)oxy)phenyl)benzenesulfonamide  
(12i)**

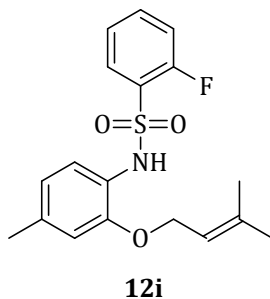

White solid (mp: 110-111 °C). Yield: 71% (248 mg). <sup>1</sup>H NMR (400 MHz, CDCl<sub>3</sub>): δ 7.77 (t, *J* = 7.3 Hz, 1H), 7.51-7.46 (m, 1H), 7.36-7.26 (m, 2H), 7.16-7.07 (m, 2H), 6.64 (d, *J* = 7.8 Hz, 1H), 6.55 (s, 1H), 5.33 (t, *J* = 6.4 Hz, 1H), 4.36 (d, *J* = 6.4 Hz, 2H), 2.23 (s, 3H), 1.80 (s, 3H), 1.70 (s, 3H). <sup>13</sup>C NMR (CDCl<sub>3</sub>, 100 MHz): δ 159.0 (d, *J* = 256.1 Hz), 148.9, 138.3, 135.5, 135.0 (d, *J* = 8.5 Hz), 130.9, 127.2 (d, *J* = 13.8 Hz), 124.0 (d, *J* = 3.8 Hz), 122.6, 121.3, 121.1, 118.9, 116.7 (d, *J* = 20.8 Hz), 112.4, 65.2, 25.8, 21.3, 18.1. Anal. calcd. for C<sub>18</sub>H<sub>20</sub>FNO<sub>3</sub>S: C, 61.87; H, 5.77; N, 4.01; found: C, 61.75; H, 5.72; N, 4.09.

**2,4-Difluoro-N-(4-methyl-2-((3-methylbut-2-en-1-yl)oxy)phenyl)benzene  
sulfonamide (12j)**

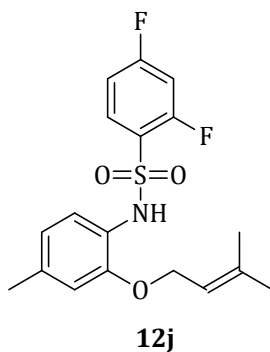

White solid (mp: 117-118 °C). Yield: 69% (254 mg). <sup>1</sup>H NMR (400 MHz, CDCl<sub>3</sub>): δ 7.78 (dt, *J* = 8.7, 6.4 Hz, 1H), 7.34 (d, *J* = 8.2 Hz, 1H), 7.22 (br s, 1H), 6.88-6.82 (m, 2H), 6.66 (d, *J* = 7.8 Hz, 1H), 6.57 (s, 1H), 5.33 (t, *J* = 6.4 Hz, 1H), 4.38 (d, *J* = 6.8 Hz, 2H), 2.26 (s, 3H), 1.82 (s, 3H), 1.71 (s, 3H). Anal. calcd. for C<sub>18</sub>H<sub>19</sub>F<sub>2</sub>NO<sub>3</sub>S: C, 58.84; H, 5.21; N, 3.81; found: C, 59.01; H, 5.26; N, 3.77.

**2,6-Difluoro-N-(4-methyl-2-((3-methylbut-2-en-1-yl)oxy)phenyl)benzene  
sulfonamide (12k)**

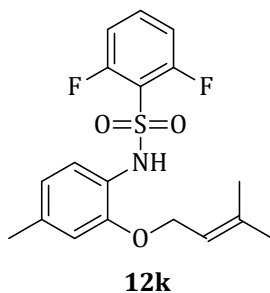

White solid (mp: 115-116 °C). Yield: 68% (250 mg).  $^1\text{H}$  NMR (400 MHz,  $\text{CDCl}_3$ ):  $\delta$  7.46-7.40 (m, 3H), 6.91 (t,  $J = 8.7$  Hz, 2H), 6.69 (d,  $J = 8.2$  Hz, 1H), 6.60 (s, 1H), 5.36 (t,  $J = 6.8$  Hz, 1H), 4.40 (d,  $J = 6.4$  Hz, 2H), 2.26 (s, 3H), 1.82 (s, 3H), 1.72 (s, 3H).  $^{13}\text{C}$  NMR ( $\text{CDCl}_3$ , 100 MHz):  $\delta$  159.9 (dd,  $J = 259.7, 3.8$  Hz), 148.7, 138.4, 135.7, 134.6-134.4 (m), 122.5, 121.4, 120.79, 120.76, 118.9 (d,  $J = 4.8$  Hz), 117.1 (t,  $J = 15.3$  Hz), 112.7 (dd,  $J = 23.9, 3.8$  Hz), 112.49, 112.46, 65.3, 25.7, 21.3, 18.1. Anal. calcd. for  $\text{C}_{18}\text{H}_{19}\text{F}_2\text{NO}_3\text{S}$ : C, 58.84; H, 5.21; N, 3.81; found: C, 58.61; H, 5.28; N, 3.92.

**4-Bromo-2-fluoro-N-(4-methyl-2-((3-methylbut-2-en-1-yl)oxy)phenyl)benzenesulfonamide (12l)**

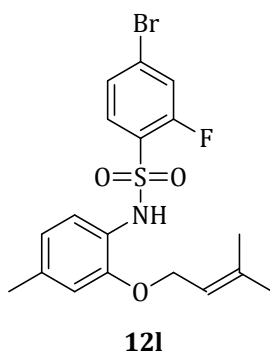

White solid (mp: 133-134 °C). Yield: 70% (300 mg).  $^1\text{H}$  NMR (400 MHz,  $\text{CDCl}_3$ ):  $\delta$  7.59 (t,  $J = 7.8$  Hz, 1H), 7.33-7.19 (m, 4H), 6.64 (d,  $J = 8.2$  Hz, 1H), 6.54 (s, 1H), 5.29 (t,  $J = 6.4$  Hz, 1H), 4.35 (d,  $J = 6.8$  Hz, 2H), 2.23 (s, 3H), 1.80 (s, 3H), 1.69 (s, 3H).  $^{13}\text{C}$  NMR ( $\text{CDCl}_3$ , 100 MHz):  $\delta$  158.7 (d,  $J = 260.7$  Hz), 149.2, 138.4, 136.1, 131.8, 128.4 (d,  $J = 9.6$  Hz), 127.4, 126.5 (d,  $J = 13.4$  Hz), 122.2, 122.0 (d,  $J = 3.8$  Hz), 121.2, 120.4 (d,  $J = 23.9$  Hz), 118.9, 112.4, 65.2, 25.8, 21.3, 18.1. Anal. calcd. for  $\text{C}_{18}\text{H}_{19}\text{BrFNO}_3\text{S}$ : C, 50.48; H, 4.47; N, 3.27; found: C, 50.69; H, 4.52; N, 3.22.

**2-Fluoro-N-(5-methoxy-2-((3-methylbut-2-en-1-yl)oxy)phenyl)benzenesulfonamide (12m)**



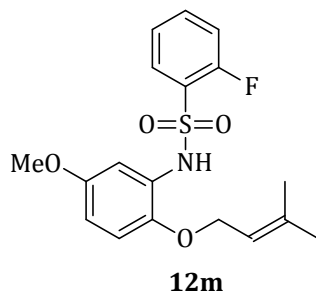

White solid (mp: 125-126 °C). Yield: 71% (259 mg).  $^1\text{H}$  NMR (400 MHz,  $\text{CDCl}_3$ ):  $\delta$  7.87 (td,  $J$  = 7.8, 1.4 Hz, 1H), 7.54-7.49 (m, 1H), 7.45 (br s, 1H), 7.21-7.10 (m, 3H), 6.69 (d,  $J$  = 9.1 Hz, 1H), 6.51 (dd,  $J$  = 8.7, 2.7 Hz, 1H), 5.36 (t,  $J$  = 6.4 Hz, 1H), 4.39 (d,  $J$  = 6.8 Hz, 2H), 3.71 (s, 3H), 1.80 (s, 3H), 1.70 (s, 3H).  $^{13}\text{C}$  NMR ( $\text{CDCl}_3$ , 100 MHz):  $\delta$  158.9 (d,  $J$  = 255.9 Hz), 153.7, 142.5, 138.5, 135.3 (d,  $J$  = 10.5 Hz), 130.9, 127.1 (d,  $J$  = 13.4 Hz), 126.5, 124.1 (d,  $J$  = 2.9 Hz), 119.2, 116.7 (d,  $J$  = 22.0 Hz), 112.8, 109.5, 106.3, 66.1, 55.6, 25.8, 18.1. Anal. calcd. for  $\text{C}_{18}\text{H}_{20}\text{FNO}_4\text{S}$ : C, 59.16; H, 5.52; N, 3.83; found: C, 59.36; H, 5.58; N, 3.72.

**2,4-Difluoro-N-(5-methoxy-2-((3-methylbut-2-en-1-yl)oxy)phenyl)benzenesulfonamide (12n)**

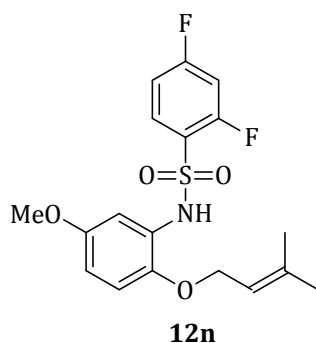

White solid (mp: 132-133 °C). Yield: 75% (288 mg).  $^1\text{H}$  NMR (400 MHz,  $\text{CDCl}_3$ ):  $\delta$  7.89-7.83 (m, 1H), 7.40 (br s, 1H), 7.09 (d,  $J$  = 3.2 Hz, 1H), 6.92-6.84 (m, 2H), 6.70 (d,  $J$  = 9.1 Hz, 1H), 6.54 (dd,  $J$  = 8.7, 2.7 Hz, 1H), 5.35 (t,  $J$  = 6.8 Hz, 1H), 4.39 (d,  $J$  = 6.8 Hz, 2H), 3.72 (s, 3H), 1.80 (s, 3H), 1.70 (s, 3H). Anal. calcd. for  $\text{C}_{18}\text{H}_{19}\text{F}_2\text{NO}_4\text{S}$ : C, 56.39; H, 4.99; N, 3.65; found: C, 56.55; H, 4.87; N, 3.74.

**N-(5-Bromo-2-((3-methylbut-2-en-1-yl)oxy)phenyl)-2-fluorobenzenesulfonamide (12o)**

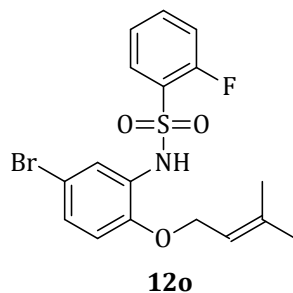

White solid (mp: 131-132 °C). Yield: 73% (303 mg). <sup>1</sup>H NMR (400 MHz, CDCl<sub>3</sub>): δ 7.89-7.86 (m, 1H), 7.62 (d, *J* = 2.3 Hz, 1H), 7.57-7.52 (m, 1H), 7.42 (br s, 1H), 7.23 (t, *J* = 7.8 Hz, 1H), 7.16-7.08 (m, 2H), 6.63 (d, *J* = 8.7 Hz, 1H), 5.34 (t, *J* = 6.8 Hz, 1H), 4.43 (d, *J* = 6.8 Hz, 2H), 1.81 (s, 3H), 1.71 (s, 3H). Anal. calcd. for C<sub>17</sub>H<sub>17</sub>BrFNO<sub>3</sub>S: C, 49.28; H, 4.14; N, 3.38; found: C, 49.38; H, 4.18; N, 3.29.

***N*-(5-Bromo-2-((3-methylbut-2-en-1-yl)oxy)phenyl)-2,4-difluorobenzene sulfonamide (12p)**

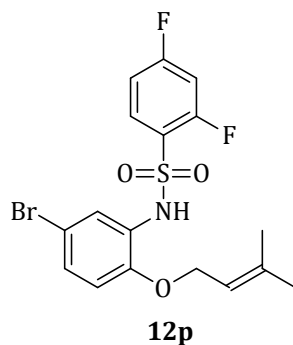

White solid (mp: 137-138 °C). Yield: 74% (320 mg). <sup>1</sup>H NMR (400 MHz, CDCl<sub>3</sub>): δ 7.88 (td, *J* = 8.2, 5.9 Hz, 1H), 7.60 (d, *J* = 2.3 Hz, 1H), 7.37 (br s, 1H), 7.12 (dd, *J* = 8.7, 2.3 Hz, 1H), 6.97-6.85 (m, 2H), 6.65 (d, *J* = 8.7 Hz, 1H), 5.33 (t, *J* = 6.8 Hz, 1H), 4.43 (d, *J* = 6.8 Hz, 2H), 1.81 (s, 3H), 1.72 (s, 3H). Anal. calcd. for C<sub>17</sub>H<sub>16</sub>BrF<sub>2</sub>NO<sub>3</sub>S: C, 47.23; H, 3.73; N, 3.24; found: C, 47.40; H, 3.68; N, 3.32.

**General procedure B: epoxidation of *N*-(2-(Allyloxy)aryl)-2-fluorobenzene sulfonamides 12**

To a stirred solution of appropriate *N*-(2-(allyloxy)aryl)-2-fluorobenzene sulfonamide **12** (0.5 mmol, 1.0 equiv) in DCE (5 mL) was added *m*-CPBA (232 mg, 1.0 mmol, 75%, 2.0 equiv) and the resulting solution mixture heated at 80 °C for 12 h. The mixture was diluted with CH<sub>2</sub>Cl<sub>2</sub> (20 mL) and then washed successively with saturated aq. solutions of Na<sub>2</sub>SO<sub>3</sub>

(5 mL) and NaHCO<sub>3</sub> (5 mL). The organic layer was separated, washed with brine (10 mL), dried (MgSO<sub>4</sub>) and concentrated under reduced pressure. The resulting crude product was purified by silica gel column chromatography using hexanes/ethyl acetate mixtures as eluent.

### 2-Fluoro-*N*-(2-(oxiran-2-ylmethoxy)phenyl)benzenesulfonamide (**5a**)

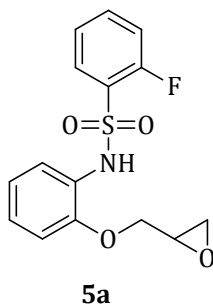

Following the **general procedure B**, the title compound **5a** was synthesized from **12a** (154 mg, 0.5 mmol). Colorless solid (mp: 125-127 °C). Yield: 65% (105 mg). <sup>1</sup>H NMR (400 MHz, CDCl<sub>3</sub>): δ 7.82 (t, *J* = 7.3 Hz, 1H), 7.55-7.48 (m, 3H), 7.20-7.14 (m, 2H), 7.01 (t, *J* = 7.8 Hz, 1H), 6.89 (t, *J* = 7.8 Hz, 1H), 6.77 (d, *J* = 8.2 Hz, 1H), 4.15 (dd, *J* = 11.0, 2.7 Hz, 1H), 3.86 (dd, *J* = 11.0, 5.9 Hz, 1H), 3.33-3.29 (m, 1H), 2.94 (t, *J* = 4.1 Hz, 1H), 2.70 (dd, *J* = 4.6, 2.7 Hz, 1H). <sup>13</sup>C NMR (CDCl<sub>3</sub>, 100 MHz): δ 158.9 (d, *J* = 255.9), 148.5, 135.3 (d, *J* = 8.6), 130.9, 127.1 (d, *J* = 12.5), 125.51, 125.47, 124.2 (d, *J* = 3.8), 121.7, 121.3, 116.9 (d, *J* = 21.1), 111.9, 69.8, 49.7, 44.5. Anal. calcd. for C<sub>15</sub>H<sub>14</sub>FNO<sub>4</sub>S: C, 55.72; H, 4.36; N, 4.33; found: C, 55.86; H, 4.31; N, 4.45.

### 2,4-Difluoro-*N*-(2-(oxiran-2-ylmethoxy)phenyl)benzenesulfonamide (**5b**)

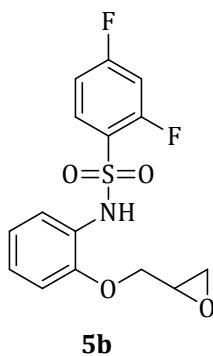

Following the **general procedure B**, the title compound **5b** was synthesized from **12b** (163 mg, 0.5 mmol). Colorless solid (mp: 139-141 °C). Yield: 62% (106 mg). <sup>1</sup>H NMR (400 MHz, CDCl<sub>3</sub>): δ 7.83 (q, *J* = 8.7 Hz, 1H), 7.49 (d, *J* = 7.8 Hz, 1H), 7.44 (s, 1H), 7.04 (t, *J* = 7.8 Hz,

1H), 6.95-6.88 (m, 3H), 6.79 (d,  $J = 8.2$  Hz, 1H), 4.19 (dd,  $J = 11.0, 2.7$  Hz, 1H), 3.85 (dd,  $J = 11.0, 5.9$  Hz, 1H), 3.33-3.30 (m, 1H), 2.95 (t,  $J = 4.1$  Hz, 1H), 2.70 (dd,  $J = 4.6, 2.7$  Hz, 1H). Anal. calcd. for  $C_{15}H_{13}F_2NO_4S$ : C, 52.78; H, 3.84; N, 4.10; found: C, 52.59; H, 3.89; N, 4.19.

### 2,6-Difluoro-*N*-(2-(oxiran-2-ylmethoxy)phenyl)benzenesulfonamide (**5c**)

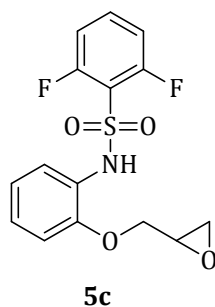

Following the **general procedure B**, the title compound **5c** was synthesized from **12c** (163 mg, 0.5 mmol). Colorless solid (mp: 131-133 °C). Yield: 64% (109 mg).  $^1H$  NMR (400 MHz,  $CDCl_3$ ):  $\delta$  7.65 (br s, 1H), 7.60 (dd,  $J = 8.4, 1.2$  Hz, 1H), 7.49-7.42 (m, 1H), 7.04 (td,  $J = 7.8, 1.4$  Hz, 1H), 6.98-6.92 (m, 3H), 6.82 (d,  $J = 7.8$  Hz, 1H), 4.19 (dd,  $J = 11.4, 3.2$  Hz, 1H), 3.89 (dd,  $J = 11.0, 5.9$  Hz, 1H), 3.34-3.31 (m, 1H), 2.94 (t,  $J = 4.6$  Hz, 1H), 2.70 (dd,  $J = 4.6, 2.3$  Hz, 1H). Anal. calcd. for  $C_{15}H_{13}F_2NO_4S$ : C, 52.78; H, 3.84; N, 4.10; found: C, 52.90; H, 3.76; N, 4.21.

### *N*-(2-((3,3-Dimethyloxiran-2-yl)methoxy)phenyl)-2-fluorobenzenesulfonamide (**5d**)

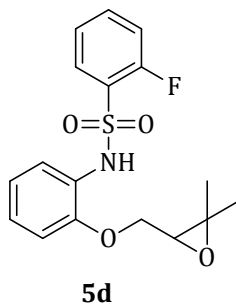

Following the **general procedure B**, the title compound **12d** was synthesized from **7d** (167 mg, 0.5 mmol). Colorless solid (mp: 131-133 °C). Yield: 75% (132 mg).  $^1H$  NMR (400 MHz,  $CDCl_3$ ):  $\delta$  7.65 (td,  $J = 7.8, 1.4$  Hz, 1H), 7.54-7.50 (m, 2H), 7.43 (br s, 1H), 7.20-7.13 (m, 2H), 7.02 (td,  $J = 7.8, 1.4$  Hz, 1H), 6.89 (t,  $J = 7.3$  Hz, 1H), 6.80 (d,  $J = 8.2$  Hz, 1H), 4.10 (dd,  $J = 10.5, 4.1$  Hz, 1H), 3.96 (dd,  $J = 11.0, 5.5$  Hz, 1H), 3.06 (t,  $J = 5.5$  Hz, 1H), 1.43 (s, 3H), 1.35 (s, 3H). Anal. calcd. for  $C_{17}H_{18}FNO_4S$ : C, 58.11; H, 5.16; N, 3.99; found C, 58.29; H, 5.09; N, 3.87.

***N*-(2-((3,3-Dimethyloxiran-2-yl)methoxy)phenyl)-2,4-difluorobenzenesulfonamide (5e)**

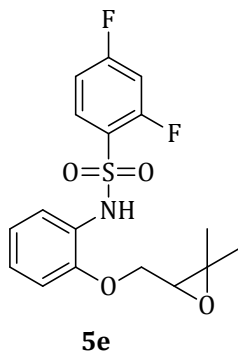

Following the **general procedure B**, the title compound **5e** was synthesized from **12e** (177 mg, 0.5 mmol). Colorless solid (mp: 138-140 °C). Yield: 73% (135 mg). <sup>1</sup>H NMR (400 MHz, CDCl<sub>3</sub>): δ 7.87-7.81 (m, 1H), 7.50 (d, *J* = 7.8 Hz, 1H), 7.38 (br s, 1H), 7.05 (t, *J* = 7.8 Hz, 1H), 6.92-6.88 (m, 3H), 6.82 (d, *J* = 8.2 Hz, 1H), 4.15 (dd, *J* = 11.0, 4.1 Hz, 1H), 3.95 (dd, *J* = 11.0, 5.9 Hz, 1H), 3.05 (t, *J* = 4.6 Hz, 1H), 1.43 (s, 3H), 1.35 (s, 3H). Anal. calcd. for C<sub>17</sub>H<sub>17</sub>F<sub>2</sub>NO<sub>4</sub>S: C, 55.28; H, 4.64; N, 3.79; found C, 55.11; H, 4.69; N, 3.68.

***N*-(2-((3,3-Dimethyloxiran-2-yl)methoxy)phenyl)-2,6-difluorobenzenesulfonamide (5f)**

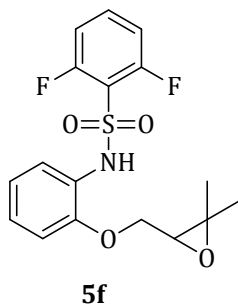

Following the **general procedure B**, the title compound **5f** was synthesized from **12f** (177 mg, 0.5 mmol). Colorless solid (mp: 145-147 °C). Yield: 72% (133 mg). <sup>1</sup>H NMR (400 MHz, CDCl<sub>3</sub>): δ 7.62-7.58 (m, 2H), 7.48-7.44 (m, 1H), 7.05 (t, *J* = 7.8 Hz, 1H), 6.98-6.91 (m, 3H), 6.84 (d, *J* = 7.8 Hz, 1H), 4.14 (dd, *J* = 10.5, 4.1 Hz, 1H), 3.98 (dd, *J* = 11.0, 5.9 Hz, 1H), 3.08 (t, *J* = 5.1 Hz, 1H), 1.43 (s, 3H), 1.35 (s, 3H). Anal. calcd. for C<sub>17</sub>H<sub>17</sub>F<sub>2</sub>NO<sub>4</sub>S: C, 55.28; H, 4.64; N, 3.79; found C, 55.45; H, 4.72; N, 3.88.

**2-Fluoro-*N*-(5-methyl-2-(oxiran-2-ylmethoxy)phenyl)benzenesulfonamide (5g)**

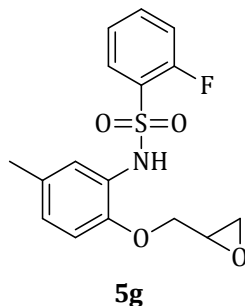

Following the **general procedure B**, the title compound **5g** was synthesized from **12g** (161 mg, 0.5 mmol). Colorless solid (mp: 115-117 °C). Yield: 62% (105 mg). <sup>1</sup>H NMR (400 MHz, CDCl<sub>3</sub>): δ 7.85-7.81 (m, 1H), 7.55-7.49 (m, 1H), 7.42 (br s, 1H), 7.32 (d, *J* = 1.4 Hz, 1H), 7.20-7.14 (m, 2H), 6.80 (dd, *J* = 8.2, 0.1 Hz, 1H), 6.66 (dd, *J* = 8.2 Hz, 1H), 4.09 (dd, *J* = 11.0, 2.7 Hz, 1H), 3.83 (dd, *J* = 11.0, 5.9 Hz, 1H), 3.31-3.27 (m, 1H), 2.92 (t, *J* = 4.5 Hz, 1H), 2.69 (dd, *J* = 4.5, 2.3 Hz, 1H), 2.23 (s, 3H). Anal. calcd. for C<sub>16</sub>H<sub>16</sub>FNO<sub>4</sub>S: C, 56.96; H, 4.78; N, 4.15; found C, 56.82; H, 4.71; N, 4.19.

**2,4-Difluoro-*N*-(5-methyl-2-(oxiran-2-ylmethoxy)phenyl)benzenesulfonamide (5h)**

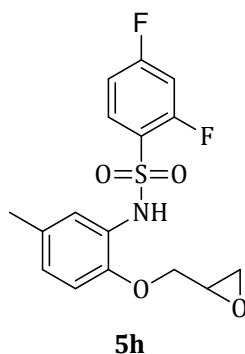

Following the **general procedure B**, the title compound **5h** was synthesized from **12h** (170 mg, 0.5 mmol). Colorless solid (mp: 129-131 °C). Yield: 64% (114 mg). <sup>1</sup>H NMR (400 MHz, CDCl<sub>3</sub>): δ 7.85-7.82 (m, 1H), 7.41 (br s, 1H), 7.30 (d, *J* = 1.4 Hz, 1H), 6.94-6.87 (m, 2H), 6.82 (dd, *J* = 8.2, 1.0 Hz, 1H), 6.66 (d, *J* = 8.2 Hz, 1H), 4.15 (dd, *J* = 11.4, 2.7 Hz, 1H), 3.80 (dd, *J* = 11.0, 5.9 Hz, 1H), 3.31-3.28 (m, 1H), 2.93 (t, *J* = 4.6 Hz, 1H), 2.69 (dd, *J* = 4.6, 2.7 Hz, 1H), 2.24 (s, 3H). Anal. calcd. for C<sub>16</sub>H<sub>15</sub>F<sub>2</sub>NO<sub>4</sub>S: C, 54.08; H, 4.25; N, 3.94; found C, 54.28; H, 4.21; N, 3.82.

***N*-(2-((3,3-Dimethyloxiran-2-yl)methoxy)-4-methylphenyl)-2-fluorobenzene sulfonamide (5i)**

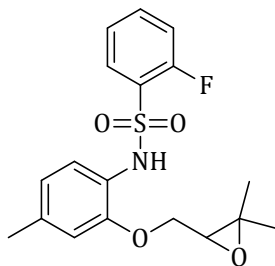

**5i**

Following the **general procedure B**, the title compound **5i** was synthesized from **12i** (175 mg, 0.5 mmol). Colorless solid (mp: 120-122 °C). Yield: 70% (128 mg). <sup>1</sup>H NMR (400 MHz, CDCl<sub>3</sub>): δ 7.80 (td, *J* = 7.3, 1.4 Hz, 1H), 7.54-7.49 (m, 1H), 7.39 (d, *J* = 8.2 Hz, 1H), 7.27 (s, 1H; overlapped with the residual CHCl<sub>3</sub> peak), 7.19-7.13 (m, 2H), 6.70 (d, *J* = 8.2 Hz, 1H), 6.59 (br s, 1H), 4.04 (dd, *J* = 11.0, 4.6 Hz, 1H), 3.92 (dd, *J* = 11.0, 5.9 Hz, 1H), 3.03 (t, *J* = 5.0 Hz, 1H), 2.25 (s, 3H), 1.43 (s, 3H), 1.34 (s, 3H). Anal. calcd. for C<sub>18</sub>H<sub>20</sub>FNO<sub>4</sub>S: C, 59.16; H, 5.52; N, 3.83; found C, 59.33; H, 5.59; N, 3.88.

***N*-((3,3-Dimethyloxiran-2-yl)methoxy)-4-methylphenyl)-2,4-difluorobenzene sulfonamide (5j)**

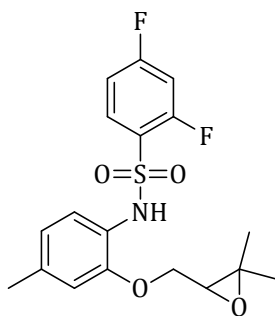

**5j**

Following the **general procedure B**, the title compound **5j** was synthesized from **12j** (184 mg, 0.5 mmol). Colorless solid (mp: 132-135 °C). Yield: 72% (138 mg). <sup>1</sup>H NMR (400 MHz, CDCl<sub>3</sub>): δ 7.82-7.77 (m, 1H), 7.37 (d, *J* = 8.2 Hz, 1H), 7.25 (s br, 1H), 6.94-6.85 (m, 2H), 6.71 (d, *J* = 7.8 Hz, 1H), 6.60 (br s, 1H), 4.10 (dd, *J* = 11.0, 4.1 Hz, 1H), 3.90 (dd, *J* = 11.0, 5.9 Hz, 1H), 3.03 (t, *J* = 4.6 Hz, 1H), 2.26 (s, 3H), 1.43 (s, 3H), 1.35 (s, 3H). Anal. calcd. for C<sub>18</sub>H<sub>19</sub>F<sub>2</sub>NO<sub>4</sub>S: C, 56.39; H, 4.99; N, 3.65; found C, 56.28; H, 4.92; N, 3.69.

***N*-((3,3-Dimethyloxiran-2-yl)methoxy)-4-methylphenyl)-2,6-difluorobenzene sulfonamide (5k)**

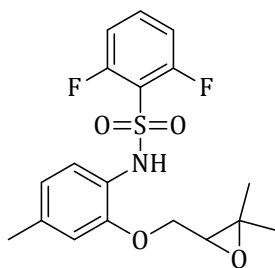

**5k**

Following the **general procedure B**, the title compound **5k** was synthesized from **12k** (184 mg, 0.5 mmol). Colorless solid (mp: 118-120 °C). Yield: 70% (134 mg). <sup>1</sup>H NMR (400 MHz, CDCl<sub>3</sub>): δ 7.49-7.41 (m, 3H), 6.95 (t, *J* = 8.7 Hz, 2H), 6.74 (d, *J* = 8.2 Hz, 1H), 6.62 (br s, 1H), 4.09 (dd, *J* = 11.0, 4.1 Hz, 1H), 3.93 (dd, *J* = 11.0, 5.9 Hz, 1H), 3.05 (t, *J* = 5.5 Hz, 1H), 2.27 (s, 3H), 1.43 (s, 3H), 1.35 (s, 3H). Anal. calcd. for C<sub>18</sub>H<sub>19</sub>F<sub>2</sub>NO<sub>4</sub>S: C, 56.39; H, 4.99; N, 3.65; found C, 56.59; H, 5.04; N, 3.61.

**4-Bromo-N-(2-((3,3-dimethyloxiran-2-yl)methoxy)-4-methylphenyl)-2-fluorobenzenesulfonamide (5l)**

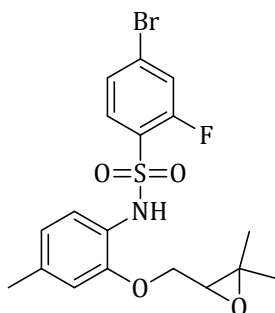

**5l**

Following the **general procedure B**, the title compound **5l** was synthesized from **12l** (214 mg, 0.5 mmol). Colorless solid (mp: 168-170 °C). Yield: 73% (162 mg). <sup>1</sup>H NMR (400 MHz, CDCl<sub>3</sub>): δ 7.64 (t, *J* = 8.2 Hz, 2H), 7.38-7.30 (m, 3H), 7.24 (br s, 1H), 6.71 (d, *J* = 7.8 Hz, 1H), 6.61 (br s, 1H), 4.09 (dd, *J* = 11.4, 4.6 Hz, 1H), 3.90 (dd, *J* = 11.0, 6.4 Hz, 1H), 3.00 (t, *J* = 4.6 Hz, 1H), 2.26 (s, 3H), 1.43 (s, 3H), 1.35 (s, 3H). Anal. calcd. for C<sub>18</sub>H<sub>19</sub>BrFNO<sub>4</sub>S: C, 48.66; H, 4.31; N, 3.15; found C, 48.80; H, 4.21; N, 3.24.

**N-(2-((3,3-Dimethyloxiran-2-yl)methoxy)-5-methoxyphenyl)-2-fluorobenzene sulfonamide (5m)**



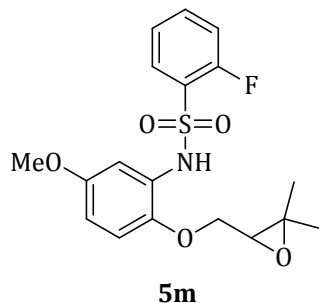

Following the **general procedure B**, the title compound **5m** was synthesized from **12m** (183 mg, 0.5 mmol). Colorless solid (mp: 138-139 °C). Yield: 74% (142 mg). <sup>1</sup>H NMR (400 MHz, CDCl<sub>3</sub>): δ 7.90-7.86 (m, 1H), 7.56-7.50 (m, 1H), 7.44 (s, 1H), 7.22-7.12 (m, 3H), 6.74 (d, *J* = 9.2 Hz, 1H), 6.53 (dd, *J* = 8.7, 2.7 Hz, 1H), 4.07 (dd, *J* = 11.0, 4.6 Hz, 1H), 3.92 (dd, *J* = 11.5, 5.9 Hz, 1H), 3.72 (s, 3H), 3.05 (t, *J* = 4.6 Hz, 1H), 1.42 (s, 3H), 1.33 (s, 3H). Anal. calcd. for C<sub>18</sub>H<sub>20</sub>FN<sub>2</sub>O<sub>5</sub>S: C, 56.68; H, 5.29; N, 3.67; found C, 56.46; H, 5.37; N, 3.59.

***N*-(2-((3,3-Dimethyloxiran-2-yl)methoxy)-5-methoxyphenyl)-2,4-difluorobenzene sulfonamide (5n)**

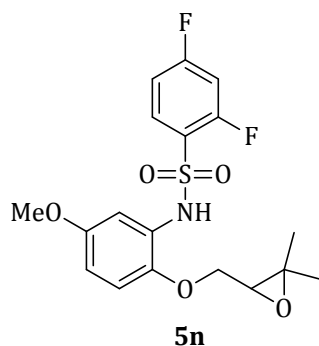

Following the **general procedure B**, the title compound **5n** was synthesized from **12n** (192 mg, 0.5 mmol). Colorless solid (mp: 126-127 °C). Yield: 74% (148 mg). <sup>1</sup>H NMR (400 MHz, CDCl<sub>3</sub>): δ 7.90-7.85 (m, 1H), 7.42 (s, 1H), 7.10 (d, *J* = 2.7 Hz, 1H), 6.93-6.98 (m, 2H), 6.75 (d, *J* = 8.7 Hz, 1H), 6.55 (dd, *J* = 9.2, 3.2 Hz, 1H), 4.11 (dd, *J* = 11.0, 4.1 Hz, 1H), 3.90 (dd, *J* = 11.0, 5.9 Hz, 1H), 3.73 (s, 3H), 3.04 (dd, *J* = 5.9, 4.1 Hz, 1H), 1.42 (s, 3H), 1.34 (s, 3H). Anal. calcd. for C<sub>18</sub>H<sub>19</sub>F<sub>2</sub>NO<sub>5</sub>S: C, 54.13; H, 4.79; N, 3.51; found C, 54.31; H, 4.73; N, 3.56.

***N*-(5-Bromo-2-((3,3-dimethyloxiran-2-yl)methoxy)phenyl)-2-fluorobenzene sulfonamide (5o)**

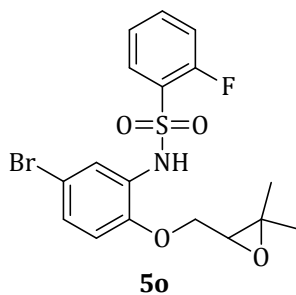

Following the **general procedure B**, the title compound **5o** was synthesized from **12o** (207 mg, 0.5 mmol). Colorless solid (mp: 143-145 °C). Yield: 71% (152 mg). <sup>1</sup>H NMR (400 MHz, CDCl<sub>3</sub>): δ 7.88 (t, *J* = 7.3 Hz, 1H), 7.65 (d, *J* = 1.8 Hz, 1H), 7.58-7.53 (m, 1H), 7.42 (br s, 1H), 7.26-7.10 (m, 3H), 6.70 (d, *J* = 8.7 Hz, 1H), 4.14 (dd, *J* = 11.0, 4.1 Hz, 1H), 3.94 (dd, *J* = 11.0, 5.9 Hz, 1H), 3.04 (t, *J* = 4.6 Hz, 1H), 1.42 (s, 3H), 1.34 (s, 3H). Anal. calcd. for C<sub>17</sub>H<sub>17</sub>BrFNO<sub>4</sub>S: C, 47.45; H, 3.98; N, 3.26; found C, 47.51; H, 3.89; N, 3.57.

***N*-(5-Bromo-2-((3,3-dimethyloxiran-2-yl)methoxy)phenyl)-2,4-difluorobenzenesulfonamide (5p)**

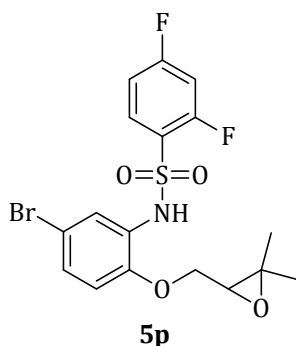

Following the **general procedure B**, the title compound **5p** was synthesized from **12p** (216 mg, 0.5 mmol). Colorless solid (mp: 153-155 °C). Yield: 69% (155 mg). <sup>1</sup>H NMR (400 MHz, CDCl<sub>3</sub>): δ 7.92-7.86 (m, 1H), 7.64 (d, *J* = 2.3 Hz, 1H), 7.40 (br s, 1H), 7.14 (dd, *J* = 8.7, 2.3 Hz, 1H), 6.98-6.90 (m, 2H), 6.71 (d, *J* = 8.7 Hz, 1H), 4.18 (dd, *J* = 11.0, 3.7 Hz, 1H), 3.93 (dd, *J* = 11.0, 6.4 Hz, 1H), 3.04 (dd, *J* = 5.9, 3.7 Hz, 1H), 1.42 (s, 3H), 1.35 (s, 3H). Anal. calcd. for C<sub>17</sub>H<sub>16</sub>BrF<sub>2</sub>NO<sub>4</sub>S: C, 45.55; H, 3.60; N, 3.12; found C, 45.29; H, 3.68; N, 3.17.

**3. General procedure C for the double cyclization reaction:**

To a stirred solution of an appropriate epoxide substrate **5** (0.2 mmol, 1.0 equiv) in dry DMF (2.0 mL) under nitrogen was added NaH (7 mg, 0.3 mmol, 1.5 equiv). The resulting mixture was stirred at rt for 4 h. The reaction mixture was then diluted with EtOAc (10 mL)

and H<sub>2</sub>O (10 mL). The mixture was then stirred vigorously for 5 min. The organic layer was separated, dried over Na<sub>2</sub>SO<sub>4</sub> and concentrated under reduced pressure. The crude product was further purified by silica gel chromatography.

**6a,7-Dihydro-6H-benzo[b]benzo[5,6][1,4]oxazino[4,3-e][1,4,5]oxathiazepine 13,13-dioxide (1a)**

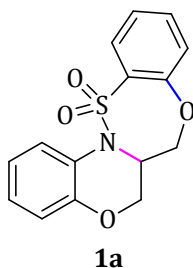

Following the **general procedure C**, the title compound **1a** was synthesized from epoxide **5a** (65 mg, 0.2 mmol). Colorless solid (mp: 149-150 °C). Yield: 85% (52 mg). <sup>1</sup>H NMR (400 MHz, CDCl<sub>3</sub>): δ 7.99 (dd, *J* = 7.8, 1.8 Hz, 1H), 7.90-7.87 (m, 1H), 7.49 (td, *J* = 7.3, 1.4 Hz, 1H), 7.26 (td, *J* = 7.3, 1.0 Hz, 1H; overlapped with residual CHCl<sub>3</sub> peak), 7.15 (dd, *J* = 7.8, 1.0 Hz, 1H), 6.93-6.89 (m, 1H), 6.84-6.80 (m, 2H), 5.08 (dq, *J* = 10.1, 2.3 Hz, 1H), 4.55 (dd, *J* = 12.8, 2.3 Hz, 1H), 4.42 (qd, *J* = 11.9, 2.7 Hz, 2H), 3.95 (dd, *J* = 13.3, 10.1 Hz, 1H). <sup>13</sup>C NMR (CDCl<sub>3</sub>, 100 MHz): δ 155.5, 144.3, 135.2, 132.9, 130.0, 124.6, 124.3, 124.1, 123.6, 122.2, 118.8, 117.8, 70.4, 65.7, 55.5. HRMS (ESI) *m/z* calcd. for C<sub>15</sub>H<sub>14</sub>NO<sub>4</sub>S [M + H]<sup>+</sup>: 304.0644, found 303.0650. Anal. calcd. for C<sub>15</sub>H<sub>13</sub>NO<sub>4</sub>S: C, 59.39; H, 4.32; N, 4.62; found: C, 59.51; H, 4.37; N, 4.53.

**10-Fluoro-6a,7-dihydro-6H-benzo[b]benzo[5,6][1,4]oxazino[4,3-e][1,4,5]oxathiazepine 13,13-dioxide (1b)**

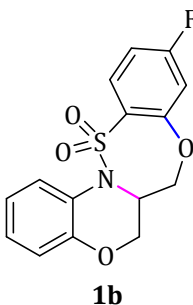

Following the **general procedure C**, the title compound **1b** was synthesized from epoxide **5b** (68 mg, 0.2 mmol). Colorless solid (mp: 154-155 °C). Yield: 87% (56 mg). <sup>1</sup>H NMR (400

MHz, CDCl<sub>3</sub>):  $\delta$  7.98 (dd,  $J$  = 8.7, 5.9 Hz, 1H), 7.85 (d,  $J$  = 8.7 Hz, 1H), 6.99-6.91 (m, 2H), 6.88-6.82 (m, 3H), 5.08-5.05 (m, 1H), 4.56 (dd,  $J$  = 12.8, 1.8 Hz, 1H), 4.42 (qd,  $J$  = 11.9, 2.3 Hz, 2H), 3.98 (dd,  $J$  = 12.8, 10.1 Hz, 1H). <sup>13</sup>C NMR (CDCl<sub>3</sub>, 100 MHz):  $\delta$  166.1 (d,  $J$  = 257.8), 157.5 (d,  $J$  = 12.5), 144.3, 131.9 (d,  $J$  = 11.5), 129.3 (d,  $J$  = 3.8), 124.5, 123.4, 122.3, 118.7, 118.0, 114.4 (d,  $J$  = 23.0), 111.9 (d,  $J$  = 22.0), 70.8, 65.7, 55.3. Anal. calcd. for C<sub>15</sub>H<sub>12</sub>FNO<sub>4</sub>S: C, 56.07; H, 3.76; N, 4.36; found: C, 56.16; H, 3.71; N, 4.31.

**12-Fluoro-6a,7-dihydro-6H-benzo[b]benzo[5,6][1,4]oxazino[4,3-e][1,4,5]oxathiazepine 13,13-dioxide (1c)**

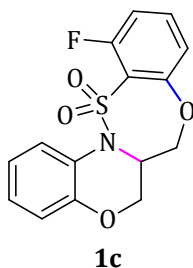

Following the **general procedure C**, the title compound **1c** was synthesized from epoxide **5c** (68 mg, 0.2 mmol). Colorless solid (mp: 144-145 °C). Yield: 85% (55 mg). <sup>1</sup>H NMR (400 MHz, CDCl<sub>3</sub>):  $\delta$  7.93 (d,  $J$  = 8.7 Hz, 1H), 7.43-7.38 (m, 1H), 7.01-6.86 (m, 5H), 5.04-5.01 (m, 1H), 4.58 (dd,  $J$  = 12.8, 2.3 Hz, 1H), 4.40 (qd,  $J$  = 11.9, 2.3 Hz, 2H), 4.03 (dd,  $J$  = 13.3, 9.6 Hz, 1H). <sup>13</sup>C NMR (CDCl<sub>3</sub>, 100 MHz):  $\delta$  160.6 (d,  $J$  = 261.7), 157.1, 144.4, 135.1 (d,  $J$  = 10.5), 124.5, 123.9, 122.5, 122.3 (d,  $J$  = 11.5), 119.8 (d,  $J$  = 2.9), 118.4, 117.9, 113.5 (d,  $J$  = 23.0), 71.2, 65.5, 55.2. HRMS (ESI)  $m/z$  calcd. for C<sub>15</sub>H<sub>13</sub>FNO<sub>4</sub>S [M + H]<sup>+</sup>: 322.0549, found 322.0546. Anal. calcd. for C<sub>15</sub>H<sub>12</sub>FNO<sub>4</sub>S: C, 56.07; H, 3.76; N, 4.36; found: C, 55.92; H, 3.81; N, 4.43.

**7,7-Dimethyl-6a,7-dihydro-6H-benzo[b]benzo[5,6][1,4]oxazino[4,3-e][1,4,5]oxathiazepine 13,13-dioxide (1d)**

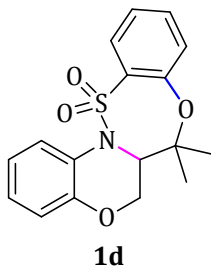

Following the **General Procedure C**, the title compound **1d** was synthesized from epoxide **5d** (70 mg, 0.2 mmol). Colorless solid (mp: 166-167 °C). Yield: 87% (58 mg). <sup>1</sup>H NMR (400 MHz, CDCl<sub>3</sub>): δ 8.00 (dd, *J* = 7.8, 1.4 Hz, 1H), 7.73-7.71 (m, 1H), 7.48 (td, 7.8, 1.4 Hz, 1H), 7.29-7.26 (m, 1H; overlapped with the residual CHCl<sub>3</sub> peak), 7.08 (d, *J* = 8.2 Hz, 1H), 6.90-6.79 (m, 3H), 4.97-4.96 (m, 1H), 4.54 (dd, *J* = 12.3, 1.4 Hz, 1H), 4.44 (dd, *J* = 12.4, 3.7 Hz, 1H), 1.66 (s, 3H), 0.91 (s, 3H). <sup>13</sup>C NMR (CDCl<sub>3</sub>, 100 MHz): δ 152.5, 144.2, 135.2, 134.4, 128.1, 126.6, 125.7, 124.2, 123.5, 121.9, 117.4, 117.2, 82.5, 65.4, 61.2, 27.8, 21.6. Anal. calcd. for C<sub>17</sub>H<sub>17</sub>NO<sub>4</sub>S: C, 61.61; H, 5.17; N, 4.23; found: C, 61.76; H, 5.21; N, 4.15.

**10-Fluoro-7,7-dimethyl-6a,7-dihydro-6H-benzo[*b*]benzo[5,6][1,4]oxazino[4,3-*e*][1,4,5]oxathiazepine 13,13-dioxide (1e)**

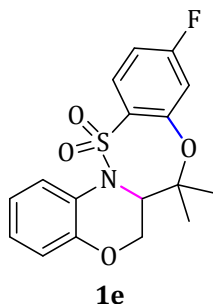

Following the **general procedure C**, the title compound **1e** was synthesized from epoxide **5e** (74 mg, 0.2 mmol). Colorless solid (mp: 153-154 °C). Yield: 86% (61 mg). <sup>1</sup>H NMR (400 MHz, CDCl<sub>3</sub>): δ 7.99 (dd, *J* = 8.7, 6.4 Hz, 1H), 7.71-7.68 (m, 1H), 6.99 (td, *J* = 8.2, 2.3 Hz, 1H), 6.91-6.87 (m, 1H), 6.83-6.79 (m, 3H), 4.95 (d, *J* = 1.8 Hz, 1H), 4.54 (dd, *J* = 12.4, 1.4 Hz, 1H), 4.44 (dd, *J* = 11.9, 3.2 Hz, 1H), 1.66 (s, 3H), 0.95 (s, 3H). <sup>13</sup>C NMR (CDCl<sub>3</sub>, 100 MHz): δ 165.8 (d, *J* = 255.9), 154.6 (d, *J* = 12.5), 144.1, 131.7 (d, *J* = 2.9), 129.8 (d, *J* = 11.5), 125.5, 123.7, 122.0, 117.5, 117.1, 114.4 (d, *J* = 23.0), 111.6 (d, *J* = 22.0), 83.7, 65.4, 61.0, 27.7, 21.7. HRMS (ESI) *m/z* calcd. for C<sub>17</sub>H<sub>17</sub>FNO<sub>4</sub>S [M + H]<sup>+</sup>: 350.0862, found 350.0866. Anal. calcd. for C<sub>17</sub>H<sub>16</sub>FNO<sub>4</sub>S: C, 58.44; H, 4.62; N, 4.01; found: C, 58.64; H, 4.55; N, 4.08.

**12-Fluoro-7,7-dimethyl-6a,7-dihydro-6H-benzo[*b*]benzo[5,6][1,4]oxazino[4,3-*e*][1,4,5]oxathiazepine 13,13-dioxide (1f)**

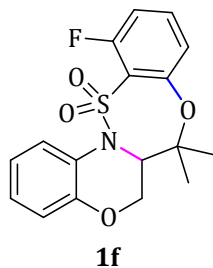

Following the **General Procedure C**, the title compound **1f** was synthesized from epoxide **5f** (74 mg, 0.2 mmol). Colorless solid (mp: 147-148 °C). Yield: 89% (62 mg). <sup>1</sup>H NMR (400 MHz, CDCl<sub>3</sub>): δ 7.77 (dd, *J* = 7.8, 1.4 Hz, 1H), 7.41 (td, *J* = 8.2, 5.9 Hz, 1H), 7.01 (t, *J* = 8.7 Hz, 1H), 6.93-6.80 (m, 4H), 4.95 (d, *J* = 1.4 Hz, 1H), 4.52 (dd, *J* = 12.4, 1.4 Hz, 1H), 4.43 (dd, *J* = 12.4, 3.2 Hz, 1H), 1.65 (s, 3H), 0.96 (s, 3H). <sup>13</sup>C NMR (CDCl<sub>3</sub>, 100 MHz): δ 159.5 (d, *J* = 260.7), 154.2, 144.0, 134.2 (d, *J* = 11.5), 125.5, 124.5 (d, *J* = 11.5), 123.8, 122.5 (d, *J* = 2.9), 122.1, 117.5, 117.2, 113.4 (d, *J* = 23.0), 83.4, 65.1, 61.1, 27.8, 21.6. <sup>19</sup>F NMR (376.87 MHz, CDCl<sub>3</sub>): δ -111.7. HRMS (ESI) *m/z* calcd. for C<sub>17</sub>H<sub>17</sub>FNO<sub>4</sub>S [M + H]<sup>+</sup>: 350.0862, found 350.0856. Anal. calcd. for C<sub>17</sub>H<sub>16</sub>FNO<sub>4</sub>S: C, 58.44; H, 4.62; N, 4.01; found: C, 58.32; H, 4.65; N, 4.09.

**2-Methyl-6a,7-dihydro-6H-benzo[*b*]benzo[5,6][1,4]oxazino[4,3-*e*][1,4,5]oxathiazepine 13,13-dioxide (1g)**

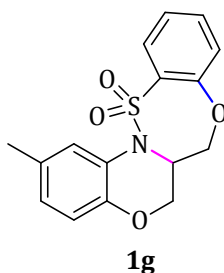

Following the **general procedure C**, the title compound **1g** was synthesized from epoxide **5g** (68 mg, 0.2 mmol). Colorless solid (mp: 109-110 °C). Yield: 83% (53 mg). <sup>1</sup>H NMR (400 MHz, CDCl<sub>3</sub>): δ 7.98 (dd, *J* = 8.7, 5.9 Hz, 1H), 7.69 (s, 1H), 7.50 (td, *J* = 7.8, 1.4 Hz, 1H), 7.29-7.26 (m, 1H), 7.16 (d, *J* = 8.2 Hz, 1H), 6.72 (s, 2H), 5.07-5.04 (m, 1H), 4.53 (dd, *J* = 12.8, 1.8 Hz, 1H), 4.38 (qd, *J* = 11.9, 2.3 Hz, 2H), 3.94 (dd, *J* = 12.8, 10.1 Hz, 1H), 2.20 (s, 3H). <sup>13</sup>C NMR (CDCl<sub>3</sub>, 100 MHz): δ 155.6, 142.1, 135.2, 133.0, 131.7, 129.9, 124.9, 124.5, 124.1, 123.1, 119.1, 117.4, 70.4, 65.7, 55.5. HRMS (ESI) *m/z* calcd. for C<sub>16</sub>H<sub>16</sub>NO<sub>4</sub>S [M + H]<sup>+</sup>: 318.0800, found 318.0805. Anal. calcd. for C<sub>16</sub>H<sub>15</sub>NO<sub>4</sub>S: C, 60.55; H, 4.76; N, 4.41; found: C, 60.72; H, 4.69; N, 4.46.

**10-Fluoro-2-methyl-6a,7-dihydro-6H-benzo[b]benzo[5,6][1,4]oxazino[4,3-e][1,4,5]oxathiazepine 13,13-dioxide (1h)**

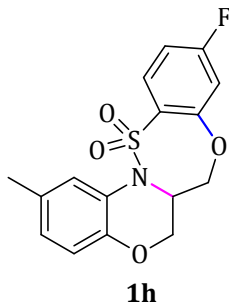

Following the **general procedure C**, the title compound **1h** was synthesized from epoxide **5h** (72 mg, 0.2 mmol). Colorless solid (mp: 115-116 °C). Yield: 85% (57 mg). <sup>1</sup>H NMR (400 MHz, CDCl<sub>3</sub>): δ 7.98 (dd, *J* = 8.7, 5.9 Hz, 1H), 7.66 (s, 1H), 6.98 (td, *J* = 8.7, 2.7 Hz, 1H), 6.87 (dd, *J* = 9.2, 2.3 Hz, 1H), 6.74 (s, 2H), 5.06-5.03 (m, 1H), 4.55 (dd, *J* = 12.8, 1.8 Hz, 1H), 4.38 (qd, *J* = 11.9, 2.3 Hz, 2H), 3.97 (dd, *J* = 12.8, 10.1 Hz, 1H), 2.21 (s, 3H). <sup>13</sup>C NMR (CDCl<sub>3</sub>, 100 MHz): δ 166.1 (d, *J* = 256.9), 157.5 (d, *J* = 12.5), 142.1, 131.77, 131.73 (d, *J* = 10.5), 129.3 (d, *J* = 3.8), 125.1, 122.9, 119.0, 117.6, 112.0 (d, *J* = 23.0), 111.9 (d, *J* = 22.0), 70.8, 65.6, 55.3, 21.1. <sup>19</sup>F NMR (376.87 MHz, CDCl<sub>3</sub>): δ -101.3. HRMS (ESI) *m/z* calcd. for C<sub>16</sub>H<sub>15</sub>FNO<sub>4</sub>S [M + H]<sup>+</sup>: 336.0706, found 336.0707. Anal. calcd. for C<sub>16</sub>H<sub>14</sub>FNO<sub>4</sub>S: C, 57.30; H, 4.21; N, 4.18; found: C, 57.46; H, 4.32; N, 4.22.

**3,7,7-Trimethyl-6a,7-dihydro-6H-benzo[b]benzo[5,6][1,4]oxazino[4,3-e][1,4,5]oxathiazepine 13,13-dioxide (1i)**

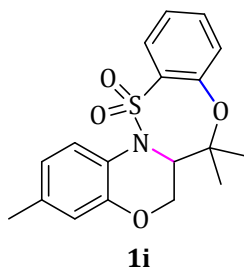

Following the **general procedure C**, the title compound **1i** was synthesized from epoxide **5i** (73 mg, 0.2 mmol). Colorless solid (mp: 175-176 °C). Yield: 88% (61 mg). <sup>1</sup>H NMR (400 MHz, CDCl<sub>3</sub>): δ 7.97 (dd, *J* = 7.8, 1.4 Hz, 1H), 7.57 (d, *J* = 9.2 Hz, 1H), 7.45 (td, *J* = 7.8, 1.4 Hz, 1H), 7.26-7.22 (m, 1H), 7.05 (d, *J* = 8.2 Hz, 1H), 6.59-6.58 (m, 2H), 4.90 (d, *J* = 1.4 Hz, 1H), 4.49 (dd, *J* = 12.4, 1.4 Hz, 1H), 4.39 (dd, *J* = 12.4, 3.7 Hz, 1H), 2.16 (s, 3H), 1.62 (s, 3H), 0.89 (s, 3H). <sup>13</sup>C NMR (CDCl<sub>3</sub>, 100 MHz): δ 152.5, 143.9, 135.3, 134.3, 133.4, 128.1, 126.6, 124.2,

123.1, 122.5, 117.8, 116.9, 82.5, 65.5, 61.2, 27.8, 21.7, 20.4. HRMS (ESI)  $m/z$  calcd. for  $C_{18}H_{20}NO_4S$   $[M + H]^+$ : 346.1113, found 346.1118. Anal. calcd. for  $C_{18}H_{19}NO_4S$ : C, 62.59; H, 5.54; N, 4.06; found: C, 62.76; H, 5.59; N, 4.16.

**10-Fluoro-3,7,7-trimethyl-6a,7-dihydro-6H-benzo[b]benzo[5,6][1,4]oxazino[4,3-e][1,4,5]oxathiazepine 13,13-dioxide (1j)**

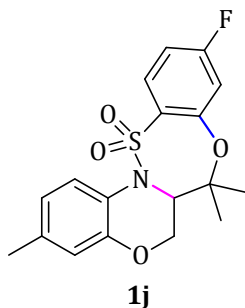

Following the **general procedure C**, the title compound **1j** was synthesized from epoxide **5k** (77 mg, 0.2 mmol). Colorless solid (mp: 179-180 °C). Yield: 87% (63 mg).  $^1H$  NMR (400 MHz,  $CDCl_3$ ):  $\delta$  7.97 (dd,  $J = 8.7, 6.4$  Hz, 1H), 7.56 (d,  $J = 9.2$  Hz, 1H), 6.98 (td,  $J = 8.7, 2.7$  Hz, 1H), 6.80 (dd,  $J = 9.1, 2.3$  Hz, 1H), 6.63-6.61 (m, 2H), 4.91 (d,  $J = 1.8$  Hz, 1H), 4.51 (dd,  $J = 11.9, 1.4$  Hz, 1H), 4.41 (dd,  $J = 11.9, 3.2$  Hz, 1H), 2.19 (s, 3H), 1.65 (s, 3H), 0.95 (s, 3H).  $^{13}C$  NMR ( $CDCl_3$ , 100 MHz):  $\delta$  165.7 (d,  $J = 256.9$ ), 154.7 (d,  $J = 12.5$ ), 143.9, 133.6, 131.8 (d,  $J = 3.8$ ), 129.7 (d,  $J = 10.8$ ), 122.9, 122.6, 117.9, 116.8, 114.3 (d,  $J = 22.3$ ), 111.5 (d,  $J = 22.3$ ), 83.6, 65.4, 61.0, 27.7, 21.7, 20.4.  $^{19}F$  NMR (376.87 MHz,  $CDCl_3$ ):  $\delta$  -102.8. HRMS (ESI)  $m/z$  calcd. for  $C_{18}H_{19}FNO_4S$   $[M + H]^+$ : 364.1019, found 364.1021. Anal. calcd. for  $C_{18}H_{18}FNO_4S$ : C, 59.49; H, 4.99; N, 3.85; found: C, 59.31; H, 4.85; N, 3.96.

**12-Fluoro-3,7,7-trimethyl-6a,7-dihydro-6H-benzo[b]benzo[5,6][1,4]oxazino[4,3-e][1,4,5]oxathiazepine 13,13-dioxide (1k)**

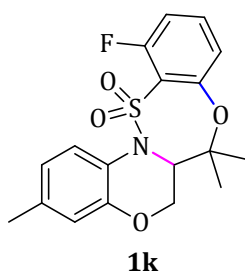

Following the **general procedure C**, the title compound **1k** was synthesized from epoxide **5k** (77 mg, 0.2 mmol). Colorless solid (mp: 182-183 °C). Yield: 87% (63 mg).  $^1H$  NMR (400



MHz, CDCl<sub>3</sub>):  $\delta$  7.63 (d,  $J$  = 8.2 Hz, 1H), 7.39 (td,  $J$  = 8.2, 5.9 Hz, 1H), 7.00 (t,  $J$  = 9.1 Hz, 1H), 6.86 (d,  $J$  = 8.2 Hz, 1H), 6.67-6.63 (m, 2H), 4.91 (d,  $J$  = 1.8 Hz, 1H), 4.49 (dd,  $J$  = 12.4, 0.9 Hz, 1H), 4.41 (dd,  $J$  = 12.4, 3.7 Hz, 1H), 2.20 (s, 3H), 1.63 (s, 3H), 0.96 (s, 3H). <sup>13</sup>C NMR (CDCl<sub>3</sub>, 100 MHz):  $\delta$  159.4 (d,  $J$  = 260.7), 154.1, 143.8, 134.1 (d,  $J$  = 10.8), 133.7, 124.5 (d,  $J$  = 11.5), 122.9, 122.7, 122.5 (d,  $J$  = 3.1), 117.8, 116.9, 113.3 (d,  $J$  = 23.1), 83.3, 65.2, 61.1, 27.8, 21.7, 20.4. <sup>19</sup>F NMR (376.87 MHz, CDCl<sub>3</sub>):  $\delta$  -111.8. HRMS (ESI)  $m/z$  calcd. for C<sub>18</sub>H<sub>19</sub>FNO<sub>4</sub>S [M + H]<sup>+</sup>: 364.1019, found 364.1017. Anal. calcd. for C<sub>18</sub>H<sub>18</sub>FNO<sub>4</sub>S: C, 59.49; H, 4.99; N, 3.85; found: C, 59.65; H, 4.89; N, 3.81.

**10-Bromo-3,7,7-trimethyl-6a,7-dihydro-6H-benzo[b]benzo[5,6][1,4]oxazino[4,3-e][1,4,5]oxathiazepine 13,13-dioxide (11)**

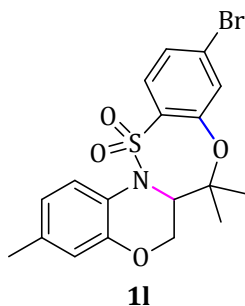

Following the **general procedure C**, the title compound **11** was synthesized from epoxide **5l** (89 mg, 0.2 mmol). Colorless solid (mp: 198-199 °C). Yield: 89% (75 mg). <sup>1</sup>H NMR (400 MHz, CDCl<sub>3</sub>):  $\delta$  7.84 (d,  $J$  = 8.2, 6.4 Hz, 1H), 7.55 (d,  $J$  = 9.2, 6.4 Hz, 1H), 7.42 (dd,  $J$  = 8.2, 1.8 Hz, 1H), 7.27 (m, 1H), 6.63-6.61 (m, 2H), 4.91 (d,  $J$  = 1.8 Hz, 1H), 4.51 (dd,  $J$  = 12.4, 1.4 Hz, 1H), 4.41 (dd,  $J$  = 11.9, 3.2 Hz, 1H), 2.20 (s, 3H), 1.64 (s, 3H), 0.94 (s, 3H). <sup>13</sup>C NMR (CDCl<sub>3</sub>, 100 MHz):  $\delta$  153.2, 143.9, 134.5, 133.7, 129.8, 128.9, 128.1, 127.5, 122.8, 122.6, 117.9, 116.8, 83.4, 65.4, 61.1, 27.7, 21.8, 20.4. Anal. calcd. for C<sub>18</sub>H<sub>18</sub>BrNO<sub>4</sub>S: C, 50.95; H, 4.28; N, 3.30; found: C, 50.79; H, 4.15; N, 3.37.

**2-Methoxy-7,7-dimethyl-6a,7-dihydro-6H-benzo[b]benzo[5,6][1,4]oxazino[4,3-e][1,4,5]oxathiazepine 13,13-dioxide (1m)**

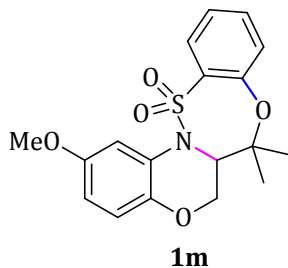

Following the **general procedure C**, the title compound **1m** was synthesized from epoxide **5m** (76 mg, 0.2 mmol). Colorless solid (mp: 137-138 °C). Yield: 86% (62 mg). <sup>1</sup>H NMR (400 MHz, CDCl<sub>3</sub>): δ 7.99 (dd, *J* = 7.8, 6.4 Hz, 1H), 7.49 (td, *J* = 7.8, 1.8 Hz, 1H), 7.38 (d, *J* = 2.7 Hz, 1H), 7.29-7.25 (m, 1H), 7.09 (d, *J* = 8.2 Hz, 1H), 6.72 (d, *J* = 8.7 Hz, 1H), 6.45 (dd, *J* = 9.1, 2.7 Hz, 1H), 4.93 (d, *J* = 1.4 Hz, 1H), 4.50 (dd, *J* = 11.9, 1.4 Hz, 1H), 4.37 (dd, *J* = 11.9, 3.2 Hz, 1H), 3.71 (s, 3H), 1.65 (s, 3H), 0.92 (s, 3H). <sup>13</sup>C NMR (CDCl<sub>3</sub>, 100 MHz): δ 154.0, 152.5, 138.2, 135.1, 134.4, 127.9, 126.7, 125.8, 124.2, 117.6, 108.8, 103.4, 82.6, 65.3, 61.3, 55.5, 27.6, 21.6. HRMS (ESI) *m/z* calcd. for C<sub>18</sub>H<sub>20</sub>NO<sub>5</sub>S [M + H]<sup>+</sup>: 362.1062, found 362.1222. Anal. calcd. for C<sub>18</sub>H<sub>19</sub>NO<sub>5</sub>S: C, 59.82; H, 5.30; N, 3.88; found: C, 60.07; H, 5.22; N, 3.92.

**10-Fluoro-2-methoxy-7,7-dimethyl-6a,7-dihydro-6H-benzo[b]benzo[5,6][1,4]oxazino[4,3-*e*][1,4,5]oxathiazepine 13,13-dioxide (1n)**

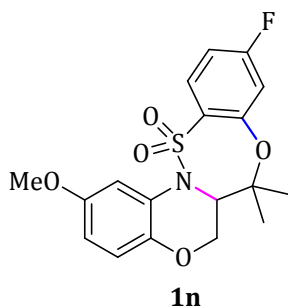

Following the **general procedure C**, the title compound **1n** was synthesized from epoxide **5n** (80 mg, 0.2 mmol). Colorless solid (mp: 145-146 °C). Yield: 87% (66 mg). <sup>1</sup>H NMR (400 MHz, CDCl<sub>3</sub>): δ 7.98 (dd, *J* = 8.7, 6.4 Hz, 1H), 7.34 (d, *J* = 2.7 Hz, 1H), 6.98 (td, *J* = 8.7, 2.3 Hz, 1H), 6.81 (dd, *J* = 9.1, 2.3 Hz, 1H), 6.73 (d, *J* = 8.7 Hz, 1H), 6.46 (dd, *J* = 8.7, 2.7 Hz, 1H), 4.91 (d, *J* = 1.4 Hz, 1H), 4.49 (dd, *J* = 12.4, 1.4 Hz, 1H), 4.37 (dd, *J* = 12.4, 3.7 Hz, 1H), 3.71 (s, 3H), 1.65 (s, 3H), 0.96 (s, 3H). <sup>13</sup>C NMR (CDCl<sub>3</sub>, 100 MHz): δ 165.8 (d, *J* = 256.9), 154.7 (d, *J* = 12.5), 154.1, 138.2, 131.7 (d, *J* = 3.8), 129.6 (d, *J* = 10.5), 125.7, 117.7, 114.4 (d, *J* = 23.0), 111.5 (d, *J* = 22.0), 108.8, 103.5, 83.8, 65.3, 61.2, 55.6, 27.6, 21.7. <sup>19</sup>F NMR (376.87 MHz, CDCl<sub>3</sub>): δ -102.5. HRMS (ESI) *m/z* calcd. for C<sub>18</sub>H<sub>19</sub>FNO<sub>5</sub>S [M + H]<sup>+</sup>: 380.0968, found

380.0972. Anal. calcd. for  $C_{18}H_{18}FNO_5S$ : C, 56.98; H, 4.78; N, 3.69; found: C, 57.75; H, 4.72; N, 3.80.

**2-Bromo-7,7-dimethyl-6a,7-dihydro-6H-benzo[*b*]benzo[5,6][1,4]oxazino[4,3-*e*][1,4,5]oxathiazepine 13,13-dioxide (1o)**

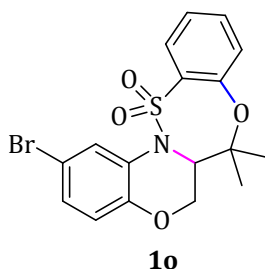

Following the **general procedure C**, the title compound **1o** was synthesized from epoxide **5o** (86 mg, 0.2 mmol). White solid (mp: 191-192 °C). Yield: 85% (70 mg).  $^1H$  NMR (400 MHz,  $CDCl_3$ ):  $\delta$  8.00 (dd,  $J = 7.8, 1.4$  Hz, 1H), 7.89 (d,  $J = 2.3$  Hz, 1H), 7.52 (td,  $J = 8.2, 1.8$  Hz, 1H), 7.31 (t,  $J = 7.8$  Hz, 1H), 7.10 (d,  $J = 7.8$  Hz, 1H), 6.98 (dd,  $J = 8.7, 2.3$  Hz, 1H), 6.68 (d,  $J = 8.7$  Hz, 1H), 4.94 (d,  $J = 1.8$  Hz, 1H), 4.54 (dd,  $J = 12.4, 1.4$  Hz, 1H), 4.38 (dd,  $J = 12.4, 3.7$  Hz, 1H), 1.65 (s, 3H), 0.91 (s, 3H).  $^{13}C$  NMR ( $CDCl_3$ , 100 MHz):  $\delta$  152.4, 143.2, 134.74, 134.71, 128.1, 126.8, 126.7, 126.3, 124.5, 120.0, 118.8, 113.9, 82.5, 65.3, 61.0, 27.7, 21.6. HRMS (ESI)  $m/z$  calcd. for  $C_{17}H_{17}BrNO_4S$  [ $M + H$ ] $^+$ : 410.0062, found 410.0069. Anal. calcd. for  $C_{17}H_{16}BrNO_4S$ : C, 49.77; H, 3.93; N, 3.41; found: C, 49.90; H, 3.99; N, 3.31.

**2-Bromo-10-fluoro-7,7-dimethyl-6a,7-dihydro-6H-benzo[*b*]benzo[5,6][1,4]oxazino[4,3-*e*][1,4,5]oxathiazepine 13,13-dioxide (1p)**

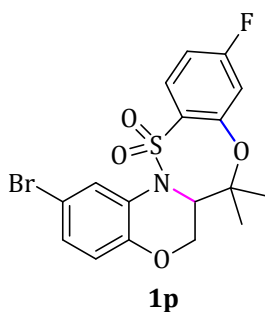

Following the **general procedure C**, the title compound **1p** was synthesized from epoxide **5p** (90 mg, 0.2 mmol). White solid (mp: 196-197 °C). Yield: 84% (72 mg).  $^1H$  NMR (400 MHz,  $CDCl_3$ ):  $\delta$  8.00 (dd,  $J = 8.7, 6.4$  Hz, 1H), 7.87 (d,  $J = 1.8$  Hz, 1H), 7.05-6.99 (m, 2H), 6.82 (dd,  $J = 9.1, 2.3$  Hz, 1H), 6.70 (d,  $J = 8.7$  Hz, 1H), 4.94 (d,  $J = 1.8$  Hz, 1H), 4.54 (dd,  $J = 11.3, 1.4$

Hz, 1H), 4.38 (dd,  $J = 11.9, 3.2$  Hz, 1H), 1.65 (s, 3H), 0.95 (s, 3H).  $^{13}\text{C}$  NMR ( $\text{CDCl}_3$ , 100 MHz):  $\delta$  166.0 (d,  $J = 256.9$ ), 154.5 (d,  $J = 12.3$ ), 143.2, 131.2 (d,  $J = 3.8$ ), 129.8 (d,  $J = 11.5$ ), 126.6, 126.5, 119.9, 118.9, 114.5 (d,  $J = 23.1$ ), 114, 111.9 (d,  $J = 22.3$ ), 83.6, 65.3, 60.9, 27.6, 21.7.  $^{19}\text{F}$  NMR (376.87 MHz,  $\text{CDCl}_3$ ):  $\delta$  -101.9. HRMS (ESI)  $m/z$  calcd. for  $\text{C}_{17}\text{H}_{16}\text{BrFNO}_4\text{S}$  [ $\text{M} + \text{H}$ ] $^+$ : 427.9967, found 427.9967. Anal. calcd. for  $\text{C}_{17}\text{H}_{15}\text{BrFNO}_4\text{S}$ : C, 47.68; H, 3.53; N, 3.27; found: C, 47.52; H, 3.64; N, 3.33.

#### 4. Synthesis of indoline-fused benzothiazepine-1,1-dioxides

##### *N*-(2-Allyl-4,5-dimethoxyphenyl)-2-fluorobenzenesulfonamide (12q)

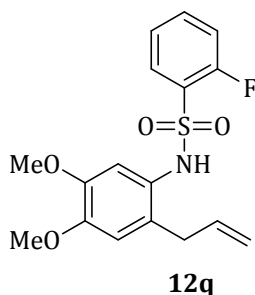

Following the steps II and III of the **general procedure A**, the title compound **12q** was synthesized from **13** (223 mg, 1.0 mmol). White solid (mp: 102-103 °C). Yield: 85% (299 mg).  $^1\text{H}$  NMR (400 MHz,  $\text{CDCl}_3$ ):  $\delta$  7.79-7.75 (m, 1H), 7.60-7.55 (m, 1H), 7.25-7.19 (m, 2H), 6.77 (s, 1H), 6.63 (s, 1H), 6.59 (s, 1H), 5.88-5.78 (m, 1H), 5.11 (dd,  $J = 10.1, 1.4$  Hz, 1H), 5.01 (dd,  $J = 16.9, 1.4$  Hz, 1H), 3.81 (s, 3H), 3.72 (s, 3H), 3.23 (d,  $J = 6.4$  Hz, 2H).  $^{13}\text{C}$  NMR ( $\text{CDCl}_3$ , 100 MHz):  $\delta$  158.8 (d,  $J = 255.9$  Hz), 147.71, 147.66, 135.9, 135.3 (d,  $J = 10.5$  Hz), 130.9, 127.9 (d,  $J = 12.5$  Hz), 126.4, 126.2, 124.5 (d,  $J = 1.9$  Hz), 116.9 (d,  $J = 22.0$  Hz), 116.6, 112.8, 109.3, 55.9, 35.5. Anal. calcd. for  $\text{C}_{17}\text{H}_{18}\text{FNO}_4\text{S}$ : C, 58.11; H, 5.16; N, 3.99; found: C, 58.26; H, 5.19; N, 3.88.

##### *N*-(2-Allyl-4,5-dimethoxyphenyl)-2,4-difluorobenzenesulfonamide (12r)

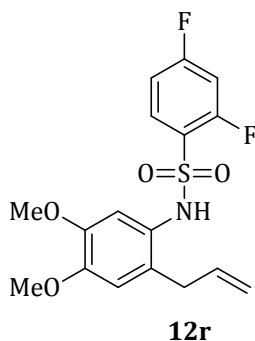

Following the steps II and III of the **general procedure A**, the title compound **7r** was synthesized from **13** (223 mg, 1.0 mmol). White solid (mp: 108-109 °C). Yield: 83% (306 mg). <sup>1</sup>H NMR (400 MHz, CDCl<sub>3</sub>): δ 7.80-7.75 (m, 1H), 6.99-6.91 (m, 2H), 6.80 (s, 1H), 6.68 (s, 1H), 6.59 (s, 1H), 5.87-5.77 (m, 1H), 5.11 (d, *J* = 10.1 Hz, 1H), 5.01 (d, *J* = 17.4 Hz, 1H), 3.81 (s, 3H), 3.75 (s, 3H), 3.20 (d, *J* = 5.9 Hz, 2H). <sup>13</sup>C NMR (CDCl<sub>3</sub>, 100 MHz): δ 165.9 (dd, *J* = 257.8, 11.5 Hz), 159.6 (dd, *J* = 257.8, 12.5 Hz), 147.8, 147.7, 135.8, 132.7 (d, *J* = 10.5 Hz), 126.2, 126.0, 124.3 (dd, *J* = 13.4, 3.8 Hz), 116.6, 112.8, 111.9 (dd, *J* = 22.0, 3.8 Hz), 109.4, 105.5 (t, *J* = 25.4 Hz), 55.9, 35.4. Anal. calcd. for C<sub>17</sub>H<sub>17</sub>F<sub>2</sub>NO<sub>4</sub>S: C, 55.28; H, 4.64; N, 3.79; found: C, 55.47; H, 4.56; N, 3.84.

### ***N*-(2-Allyl-4,5-dimethoxyphenyl)-4-bromo-2-fluorobenzenesulfonamide (12s)**

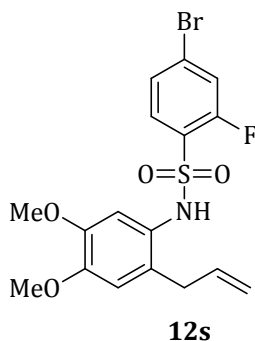

Following the steps II and III of the **general procedure A**, the title compound **7s** was synthesized from **13** (223 mg, 1.0 mmol). White solid (mp: 128-129 °C). Yield: 83% (357 mg). <sup>1</sup>H NMR (400 MHz, CDCl<sub>3</sub>): δ 7.62 (t, *J* = 7.8 Hz, 1H), 7.41 (dd, *J* = 9.1, 1.4 Hz, 1H), 7.36 (dd, *J* = 8.2, 1.4 Hz, 1H), 6.80 (s, 1H), 6.71 (br s, 1H), 6.59 (s, 1H), 5.87-5.77 (m, 1H), 5.11 (dd, *J* = 10.1, 1.4 Hz, 1H), 4.99 (dd, *J* = 16.9, 1.4 Hz, 1H), 3.82 (s, 3H), 3.76 (s, 3H), 3.20 (d, *J* = 5.9 Hz, 2H). <sup>13</sup>C NMR (CDCl<sub>3</sub>, 100 MHz): δ 158.4 (d, *J* = 259.7 Hz), 147.8, 147.7, 135.8, 131.8 (d, *J* = 2.8 Hz), 128.6 (d, *J* = 8.6 Hz), 127.9 (d, *J* = 3.8 Hz), 127.0 (d, *J* = 14.4 Hz), 126.2, 125.9, 120.6 (d, *J* = 24.9 Hz), 116.7, 112.8, 109.4, 56.0, 35.5. Anal. calcd. for C<sub>17</sub>H<sub>17</sub>BrFNO<sub>4</sub>S: C, 47.45; H, 3.98; N, 3.26; found: 47.53; H, 3.92; N, 3.35.

### ***N*-(4,5-Dimethoxy-2-(oxiran-2-ylmethyl)phenyl)-2-fluorobenzenesulfonamide (5q)**

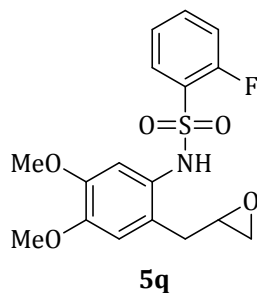

Following the **general procedure B**, the title compound **5q** was synthesized from **12q** (176 mg, 1.0 mmol). White solid (mp: 121-122 °C). Yield: 60% (110 mg). <sup>1</sup>H NMR (400 MHz, CDCl<sub>3</sub>): δ 7.88-7.84 (m, 1H), 7.54-7.49 (m, 1H), 7.20 (t, *J* = 7.8 Hz, 1H), 7.13-7.08 (m, 2H), 6.61 (s, 1H), 4.71-4.65 (m, 1H), 3.87 (s, 3H), 3.79 (s, 3H), 3.76 (d, *J* = 5.5 Hz, 2H), 3.08 (dd, *J* = 16.0, 9.6 Hz, 1H), 2.69 (dd, *J* = 15.6, 2.3 Hz, 1H), 2.23 (br s, 1H). <sup>13</sup>C NMR (CDCl<sub>3</sub>, 100 MHz): δ 158.8 (d, *J* = 256.9 Hz), 148.6, 146.9, 135.5 (d, *J* = 8.6 Hz), 133.9, 131.7, 125.6 (d, *J* = 14.4 Hz), 124.4 (d, *J* = 3.8 Hz), 122.8, 117.3 (d, *J* = 22.0 Hz), 108.0, 101.7, 64.4 (d, *J* = 3.8 Hz), 56.2 (d, *J* = 6.7 Hz), 31.3. Anal. calcd. for C<sub>17</sub>H<sub>18</sub>FNO<sub>5</sub>S: C, 55.58; H, 4.94; N, 3.81; found: C, 55.43; H, 4.99; N, 3.85.

***N*-(4,5-Dimethoxy-2-(oxiran-2-ylmethyl)phenyl)-2,4-difluorobenzenesulfonamide (5r)**

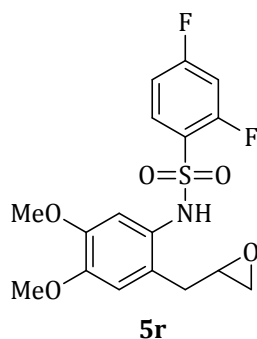

Following the **general procedure B**, the title compound **5r** was synthesized from **12r** (185 mg, 1.0 mmol). White solid (mp: 129-130 °C). Yield: 64% (119 mg). <sup>1</sup>H NMR (400 MHz, CDCl<sub>3</sub>): δ 7.87-7.81 (m, 1H), 7.08 (s, 1H), 6.92-6.80 (m, 2H), 6.61 (s, 1H), 4.63-4.58 (m, 1H), 3.83 (s, 3H), 3.77 (s, 3H), 3.74-3.69 (m, 2H), 3.05 (dd, *J* = 16.0, 9.6 Hz, 1H), 2.70 (dd, *J* = 15.6, 2.3 Hz, 1H), 2.52 (br s, 1H). <sup>13</sup>C NMR (CDCl<sub>3</sub>, 100 MHz): δ 165.8 (dd, *J* = 258.8, 11.5 Hz), 159.5 (dd, *J* = 258.8, 12.5 Hz), 148.5, 146.9, 133.3 (dd, *J* = 10.5, 1.9 Hz), 132.9, 122.8, 121.9 (dd, *J* = 15.3, 3.8 Hz), 112.9 (dd, *J* = 22.0, 3.8 Hz), 108.0, 105.7 (t, *J* = 25.9 Hz), 101.6, 64.3 (d,

$J = 3.8$  Hz), 56.1 (d,  $J = 8.6$  Hz), 31.1. Anal. calcd. for  $C_{17}H_{17}F_2NO_5S$ : C, 52.98; H, 4.45; N, 3.63; found: C, 53.11; H, 4.54; N, 3.69.

**2,3-Dimethoxy-12a,13-dihydro-12H-benzo[2,3][1,4,5]oxathiazepino[5,6-*a*]indole 6,6-dioxide (1q)**

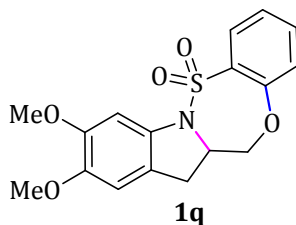

Following the **General Procedure C**, the title compound **1q** was synthesized from epoxide **5q** (73 mg, 0.2 mmol). White solid (mp: 158-159 °C). Yield: 90% (62 mg).  $^1H$  NMR (400 MHz,  $CDCl_3$ ):  $\delta$  7.97 (dd,  $J = 7.8, 1.4$  Hz, 1H), 7.44 (d,  $J = 7.8, 1.4$  Hz, 1H), 7.23 (t,  $J = 7.3$  Hz, 1H), 7.10 (d,  $J = 8.2, 1.4$  Hz, 1H), 7.04 (s, 1H), 6.70 (s, 1H), 4.98-4.94 (m, 1H), 4.54 (dd,  $J = 12.8, 2.3$  Hz, 1H), 3.83-3.78 (m, 7H), 3.39 (dd,  $J = 15.6, 9.2$  Hz, 1H), 2.64 (d,  $J = 15.6$  Hz, 1H).  $^{13}C$  NMR ( $CDCl_3$ , 100 MHz):  $\delta$  156.1, 148.9, 145.6, 134.5, 133.9, 133.5, 129.0, 124.2, 123.1, 120.1, 109.0, 98.8, 73.5, 62.9, 56.4, 56.1, 30.9. HRMS (ESI)  $m/z$  calcd. for  $C_{17}H_{18}NO_5S$  [ $M + H$ ] $^+$ : 348.0906, found 348.0909. Anal. calcd. for  $C_{17}H_{17}NO_5S$ : C, 58.78; H, 4.93; N, 4.03; found: C, 58.94; H, 4.96; N, 4.10.

**9-fluoro-2,3-dimethoxy-12a,13-dihydro-12H-benzo[2,3][1,4,5]oxathiazepino[5,6-*a*]indole 6,6-dioxide (1r)**

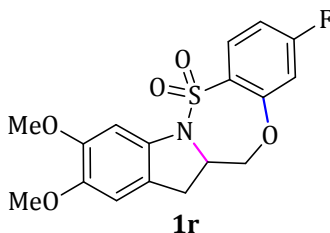

Following the **General Procedure C**, the title compound **1p** was synthesized from epoxide **5r** (77 mg, 0.2 mmol). White solid (mp: 162-163 °C). Yield: 88% (65 mg).  $^1H$  NMR (400 MHz,  $CDCl_3$ ):  $\delta$  7.97 (dd,  $J = 8.7, 6.4$  Hz, 1H), 7.01 (s, 1H), 6.94 (td,  $J = 8.7, 2.3$  Hz, 1H), 6.80 (dd,  $J = 9.1, 2.3$  Hz, 1H), 6.71 (s, 1H), 4.95-4.91 (m, 1H), 4.64 (dd,  $J = 13.3, 2.7$  Hz, 1H), 3.90-3.85 (m, 7H), 3.41 (dd,  $J = 15.6, 9.6$  Hz, 1H), 2.72 (d,  $J = 15.6$  Hz, 1H). HRMS (ESI)  $m/z$  calcd.

for  $C_{17}H_{17}FNO_5S$   $[M + H]^+$ : 366.0811, found 366.0810. Anal. calcd. for  $C_{17}H_{16}FNO_5S$ : C, 55.88; H, 4.41; N, 3.83; found: C, 55.78; H, 4.39; N, 3.88.

### 9-Bromo-2,3-dimethoxy-12a,13-dihydro-12*H*-benzo[2,3][1,4,5]oxathiazepino[5,6-*a*]indole 6,6-dioxide (**1s**)

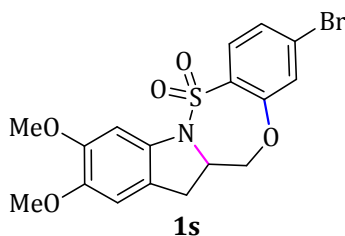

Following the **General Procedure C**, the title compound **1s** was synthesized from epoxide **5s** (89 mg, 0.2 mmol). White solid (mp: 176-177 °C). Yield: 90% (77 mg).  $^1H$  NMR (400 MHz,  $CDCl_3$ ):  $\delta$  7.82 (d,  $J = 8.2$  Hz, 1H), 7.37 (dd,  $J = 8.2, 1.8$  Hz, 1H), 7.28-7.27 (m, 1H; overlapped with the residual  $CHCl_3$  peak), 7.00 (s, 1H), 6.71 (s, 1H), 4.95-4.91 (m, 1H), 4.62 (dd,  $J = 12.8, 1.8$  Hz, 1H), 3.88-3.80 (m, 7H), 3.41 (dd,  $J = 16.0, 9.6$  Hz, 1H), 2.70 (d,  $J = 15.6$  Hz, 1H). Anal. calcd. for  $C_{17}H_{16}BrNO_5S$ : C, 47.90; H, 3.78; N, 3.29; found: C, 47.72; H, 3.86; N, 3.24.

### 4. Synthesis of 1,4-benzoxazine -fused benzothiazepine-1,1-dioxides using preformed epoxide building block

#### (2*S*\*,3*R*\*)-2-((2-Nitrophenoxy)methyl)-3-propyloxirane (**12**)

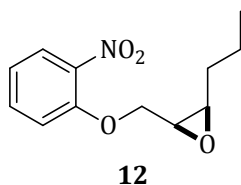

Following the first step of the **general procedure A**, the title compound **12** was synthesized from 2-nitrophenol **11a** (139 mg, 1.0 mmol, 1.0 equiv) and epoxy tosylate **7** (324 mg, 1.2 mmol, 1.2 equiv). Yellow gum. Yield: 95% (225 mg).  $^1H$  NMR (400 MHz,  $CDCl_3$ ):  $\delta$  7.85 (dd,  $J = 7.8, 0.9$  Hz, 1H), 7.57-7.53 (m, 1H), 7.17 (d,  $J = 8.2$  Hz, 1H), 6.70 (t,  $J = 7.8$  Hz, 1H), 4.32 (dd,  $J = 11.0, 4.1$  Hz, 1H), 4.24 (dd,  $J = 11.0, 5.9$  Hz, 1H), 3.38 (q,  $J = 5.5$  Hz, 1H), 3.13-3.11 (m, 1H), 1.63-1.47 (m, 4H), 0.98 (t,  $J = 7.3$  Hz, 3H). Anal. calcd. for  $C_{12}H_{15}NO_4$ : C, 60.75; H, 6.37; N, 5.90; found: C, 60.64; H, 6.33; N, 5.83.



**(6aR\*,7R\*)-7-Propyl-6a,7-dihydro-6H-benzo[b]benzo[5,6][1,4]oxazino[4,3-e][1,4,5]oxathiazepine 13,13-dioxide (1t)**

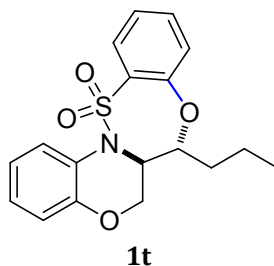

To a stirred solution of substrate **14** (200 mg, 0.84 mmol) and 10% Pd-C (25 mg) in MeOH (3 mL) was added triethylsilane (0.402 mL, 2.52 mmol) under a nitrogen-filled balloon. After 30 min, the mixture was filtered through celite and the solvent was removed in vacuo. The crude product thus obtained was dissolved in pyridine (3 mL) at 0 °C. A solution of 2-fluorobenzenesulfonyl chloride (163 mg, 0.84 mmol) was then added. The mixture was stirred for 12 h at room temperature. The reaction was quenched by adding 5N HCl solution at 0 °C. The mixture was extracted with CH<sub>2</sub>Cl<sub>2</sub> (20 mL). The organic layer was separated, washed with brine, dried (MgSO<sub>4</sub>), filtered, and evaporated under reduced pressure. The resulting residue was dissolved in dry DMF (2.0 mL) under nitrogen atmosphere and NaH (23 mg, 1.00 mmol) was then added to it. The resulting mixture was stirred at rt for 4 h. The reaction mixture was then diluted with EtOAc (10 mL) and H<sub>2</sub>O (10 mL). The mixture was then stirred vigorously for 5 min. The organic layer was separated, dried over Na<sub>2</sub>SO<sub>4</sub> and concentrated under reduced pressure. The crude product was further purified by silica gel chromatography to isolate **1t** as colorless solid. Yield: 72% (209 mg). <sup>1</sup>H NMR (400 MHz, CDCl<sub>3</sub>): δ 7.98 (dd, *J* = 7.8, 0.9 Hz, 1H), 7.74 (d, *J* = 8.2 Hz, 1H), 7.45 (td, *J* = 7.8, 0.9 Hz, 1H), 7.25-7.22 (m, 1H), 7.09 (d, *J* = 8.2 Hz, 1H), 6.89-6.76 (m, 3H), 4.84 (d, *J* = 8.7 Hz, 1H), 4.51 (dd, *J* = 11.9, 1.8 Hz, 1H), 4.35 (dd, *J* = 11.9, 1.8 Hz, 1H), 3.38 (td, *J* = 9.6, 2.7 Hz, 1H), 1.89-1.72 (m, 3H), 1.59-1.50 (m, 1H), 1.00 (t, *J* = 7.1 Hz, 3H). <sup>13</sup>C NMR (CDCl<sub>3</sub>, 100 MHz): δ 155.8, 144.9, 135.1, 133.7, 129.6, 124.4, 124.2, 124.02, 123.98, 122.0, 118.8, 117.6, 79.9, 65.8, 59.7, 33.6, 18.5, 13.8. Anal. calcd. for C<sub>18</sub>H<sub>19</sub>NO<sub>4</sub>S: C, 62.59; H, 5.54; N, 4.06; S, 62.76; O, 5.65; N, 4.09.

### 6. X-ray crystallography

X-ray reflections were collected on a Bruker APEX-II, CCD diffractometer using Mo K $\alpha$  ( $\lambda$  = 0.71073 Å) radiation. Data reduction was performed using Bruker SAINT Software.<sup>1</sup> Intensities for absorption were corrected using SADABS. Structures were solved and

refined using SHELXL-2014 with anisotropic displacement parameters for non-H atoms. Hydrogen atom on O was experimentally located in the crystal structure. All C–H atoms were fixed geometrically using the HFIX command in SHELX-TL.<sup>2</sup> A check of the final CIF file using PLATON did not show any missed symmetry.<sup>3,4</sup> Compound **11** is crystallized in Tetragonal space group *I*-4. Figure ESI-1 shows the The ORTEP diagram of **11** with 35% probability ellipsoid.

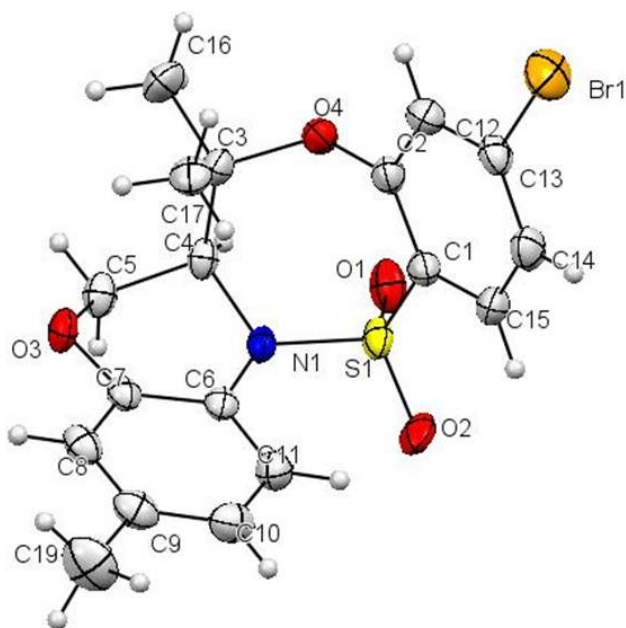

**Figure ESI-1.** ORTEP diagram of **11** with 35% probability ellipsoid.

Table ESI-1 shows the summarizes the crystallographic parameters for the structure.

Table ESI-1: Crystallographic data of **11**

| Crystal Data   |                                                     |
|----------------|-----------------------------------------------------|
| Formula unit   | C <sub>18</sub> H <sub>18</sub> NO <sub>4</sub> SBr |
| Formula wt.    | 424.29                                              |
| Crystal system | Tetragonal                                          |
| T [K]          | 100                                                 |
| <i>a</i> [Å]   | 18.5372(6)                                          |
| <i>b</i> [Å]   | 18.5372(6)                                          |
| <i>c</i> [Å]   | 10.4950(4)                                          |

|                                        |                                  |
|----------------------------------------|----------------------------------|
| $\alpha$ [°]                           | 90                               |
| $\beta$ [°]                            | 90                               |
| $\gamma$ [°]                           | 90                               |
| Volume [Å <sup>3</sup> ]               | 3606.4(3)                        |
| Space group                            | <i>I</i> -4                      |
| <i>Z</i>                               | 4                                |
| $D_{\text{calc}}$ [mg/m <sup>3</sup> ] | 1.563                            |
| $\mu$ /mm <sup>-1</sup>                | 2.418                            |
| Reflns. Collected                      | 52966                            |
| Unique reflns.                         | 3188                             |
| Observed reflns.                       | 2672                             |
| $R_1$ [ $I > 2\sigma(I)$ ], $wR_2$     | 0.0292; 0.0558                   |
| GOF                                    | 1.034                            |
| Instrument                             | Bruker APEX-II                   |
| X-ray                                  | MoK $\alpha$ ; $\lambda=0.71073$ |
| CCDC Reference No.                     | 1966259                          |

## References

1. SAINT Plus, Bruker AXS Inc.: Madison, WI, 2008; BRUKER AXS (v 6.14).
2. Bruker AXS Inc.: Madison, WI, 2008.
3. PLATON, A Multipurpose Crystallographic Tool; A. L. Spek, Utrecht University: Utrecht, Netherland, 2002.
4. A. L. Spek, *J. Appl. Crystallogr.*, 2003, **36**, 7–13.

## 6. Copies of <sup>1</sup>H and <sup>13</sup>C NMR spectra of all new compounds

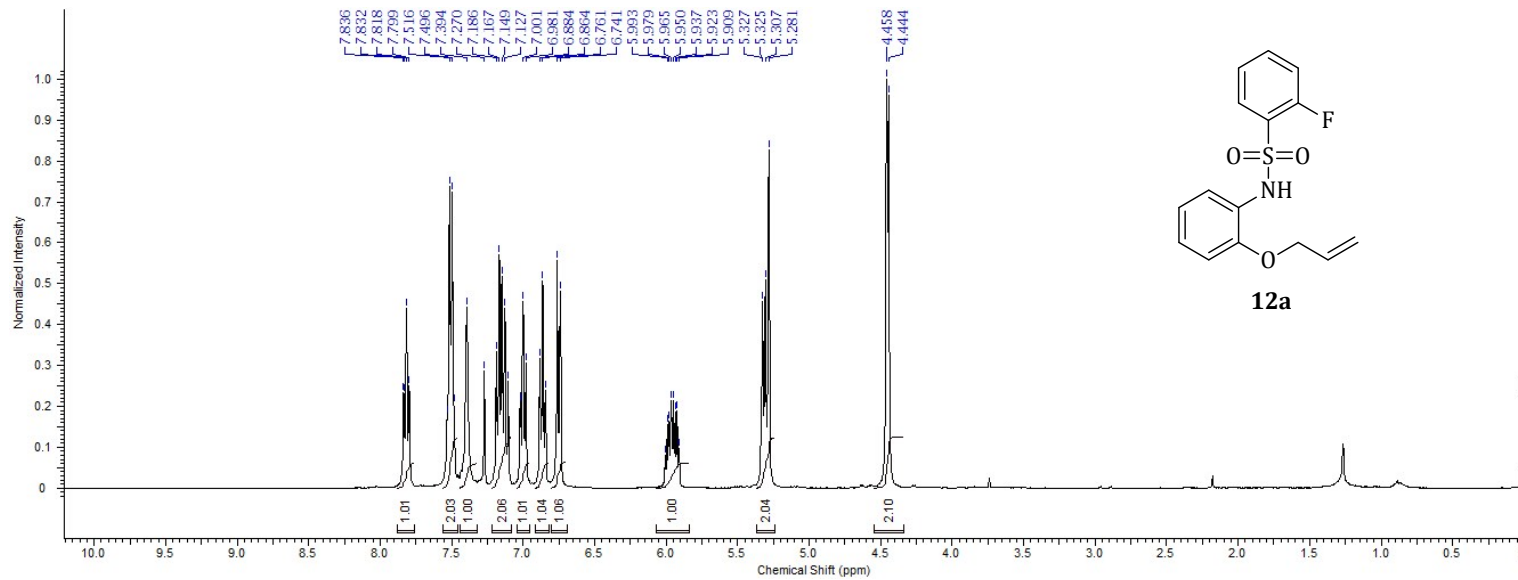

**<sup>1</sup>H NMR spectrum (400 MHz, CDCl<sub>3</sub>) of 12a**

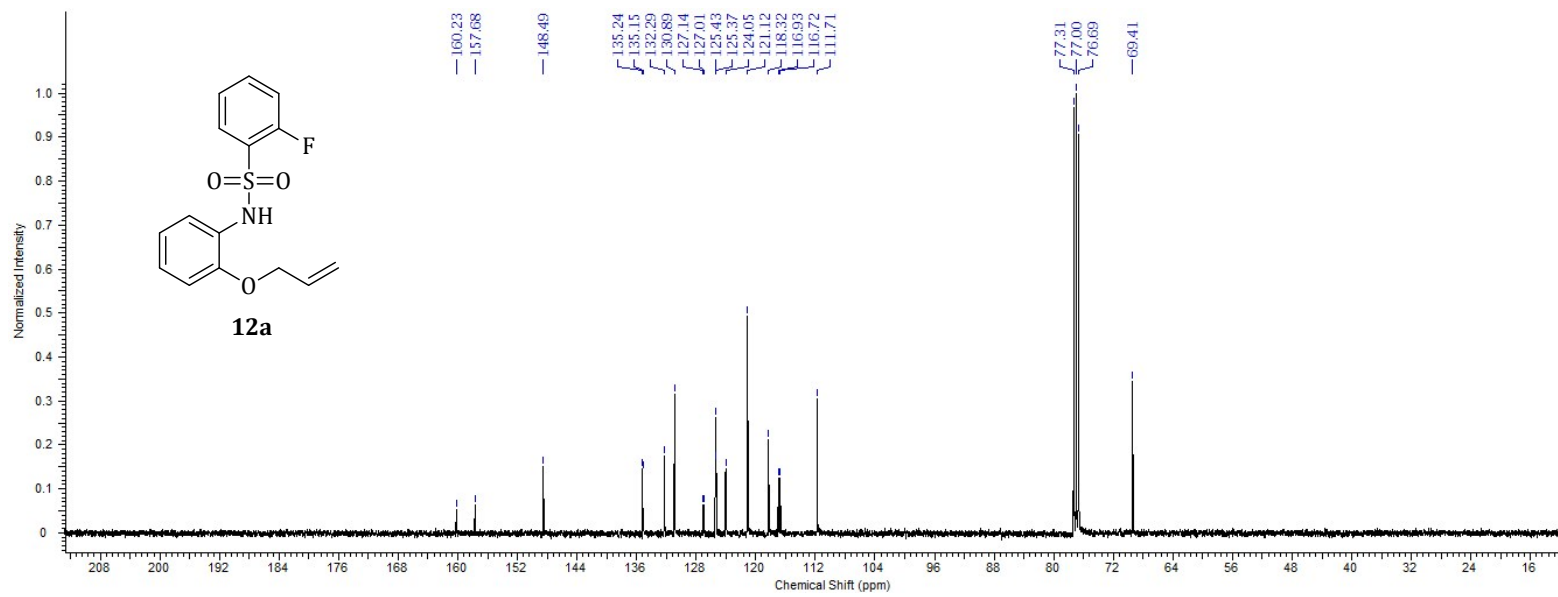

**<sup>13</sup>C NMR spectrum (100 MHz, CDCl<sub>3</sub>) of 12a**

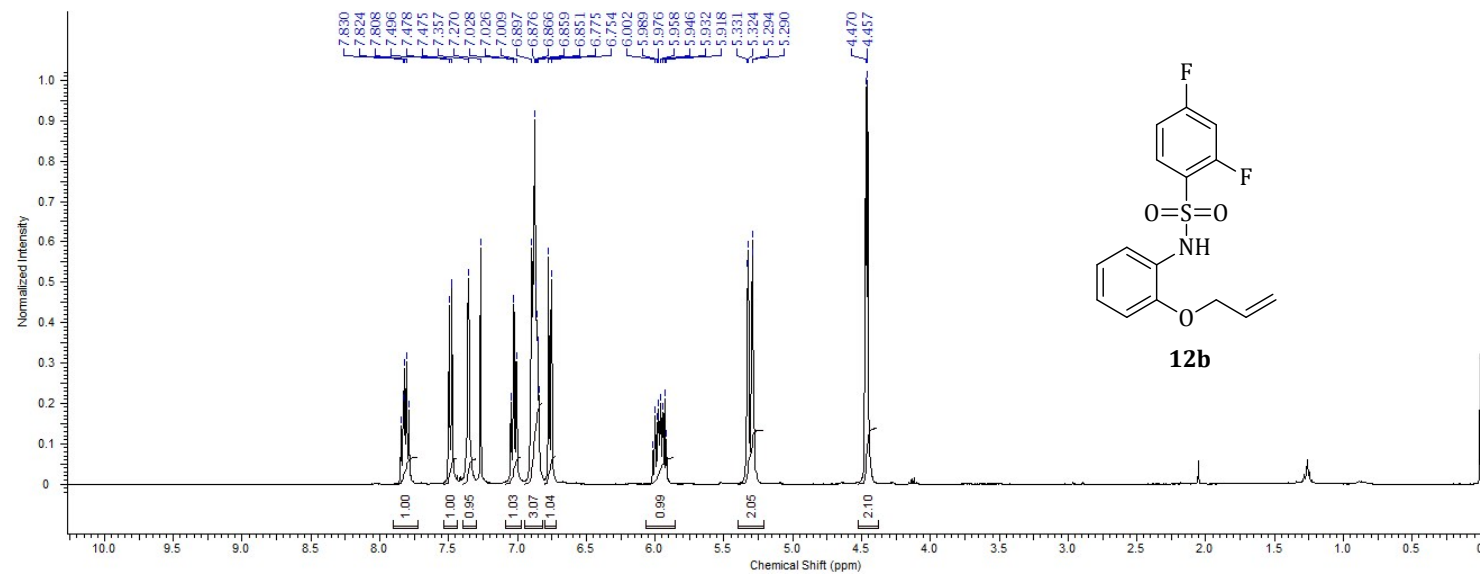

**<sup>1</sup>H NMR spectrum (400 MHz, CDCl<sub>3</sub>) of 12b**

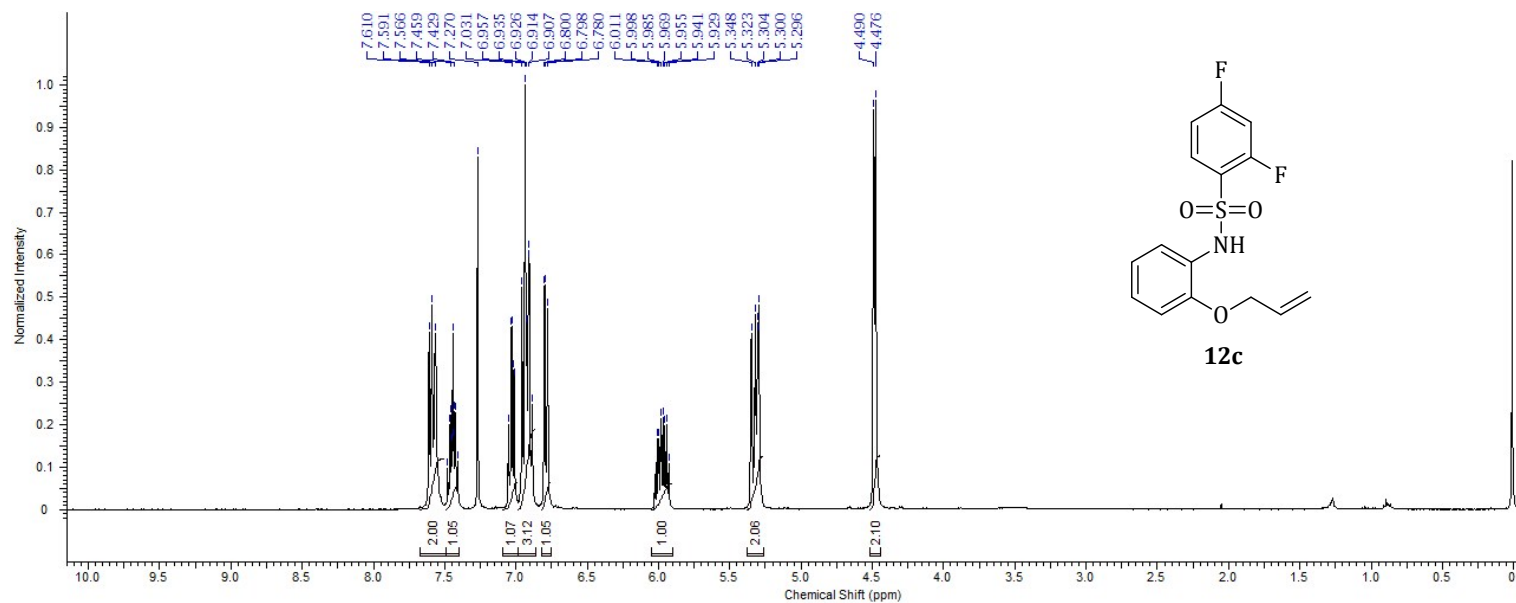

**<sup>1</sup>H NMR spectrum (400 MHz, CDCl<sub>3</sub>) of 12c**

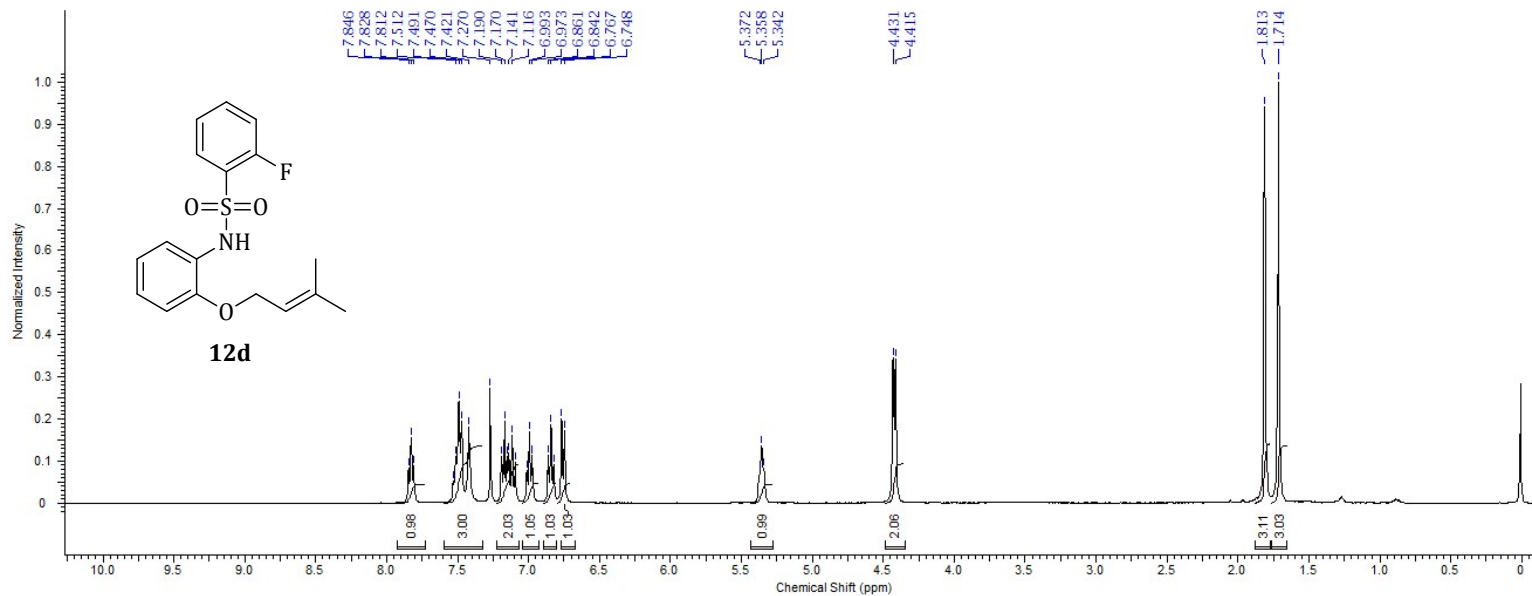

**<sup>1</sup>H NMR spectrum (400 MHz, CDCl<sub>3</sub>) of 12d**

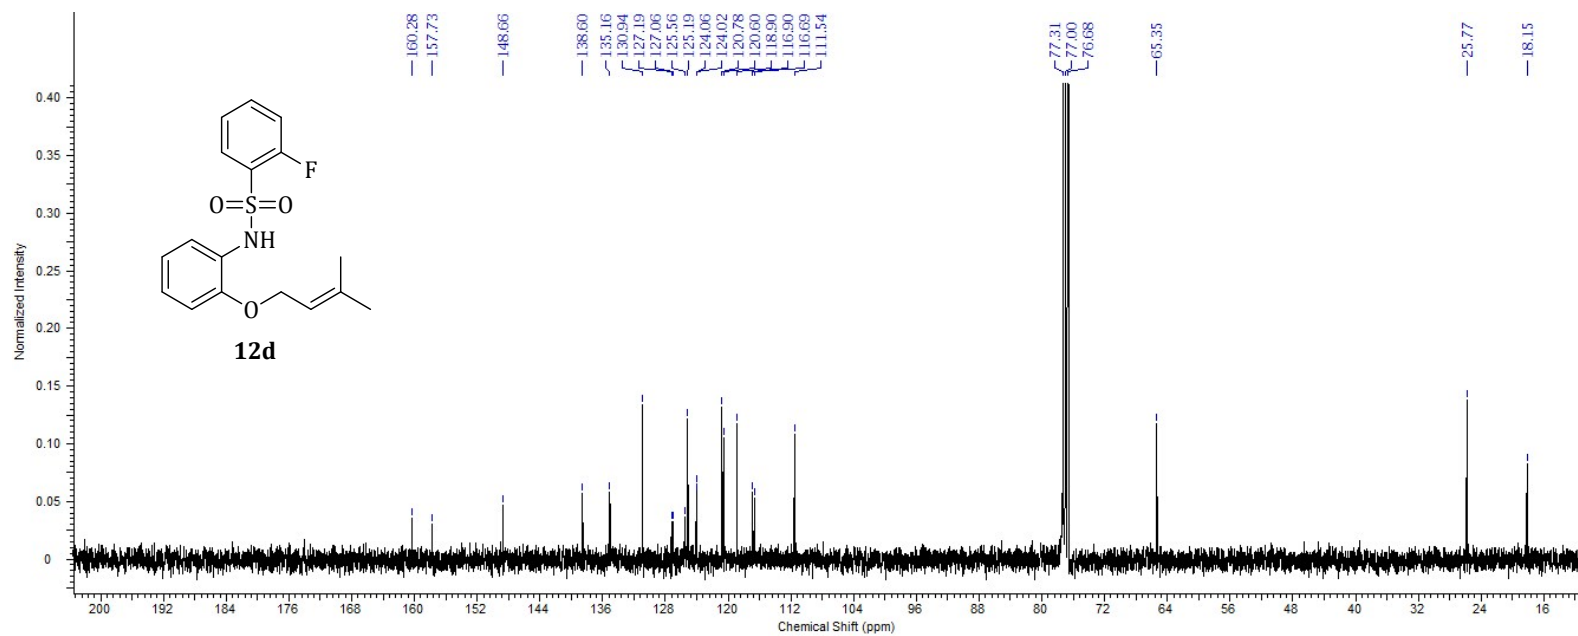

**<sup>13</sup>C NMR spectrum (100 MHz, CDCl<sub>3</sub>) of 12d**

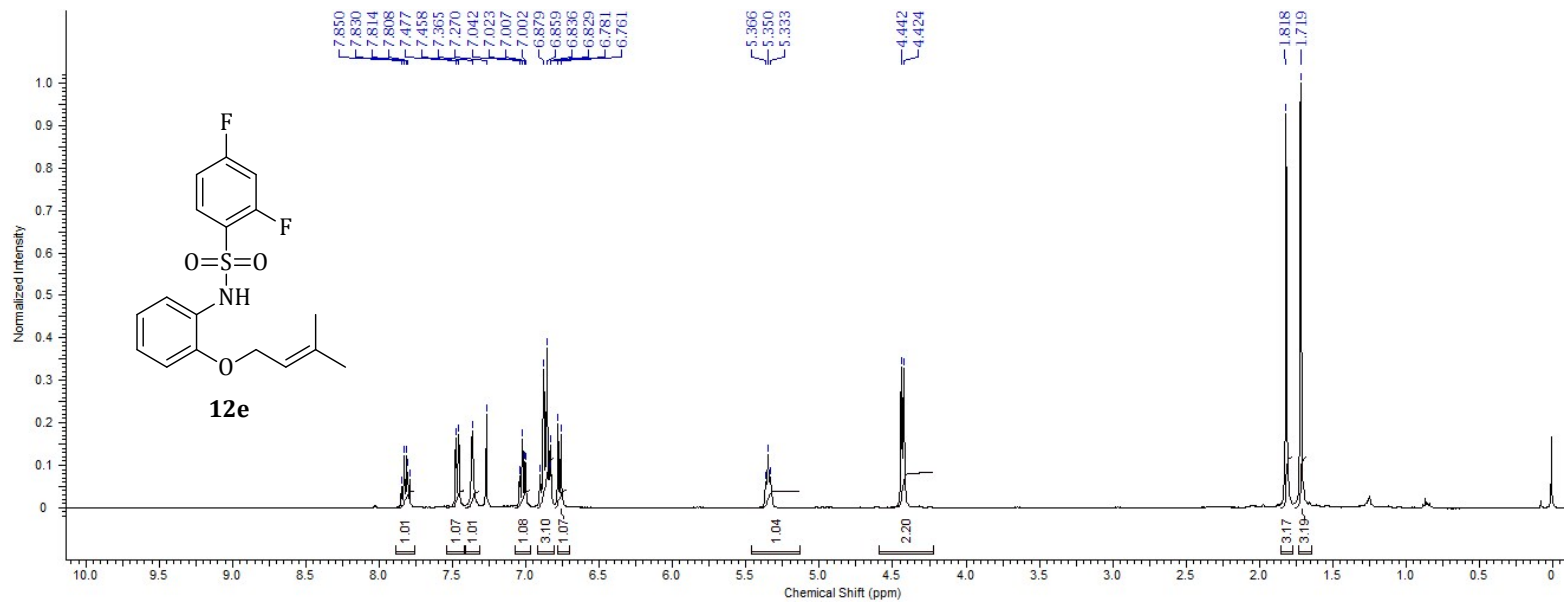

**<sup>1</sup>H NMR spectrum (400 MHz, CDCl<sub>3</sub>) of 12e**

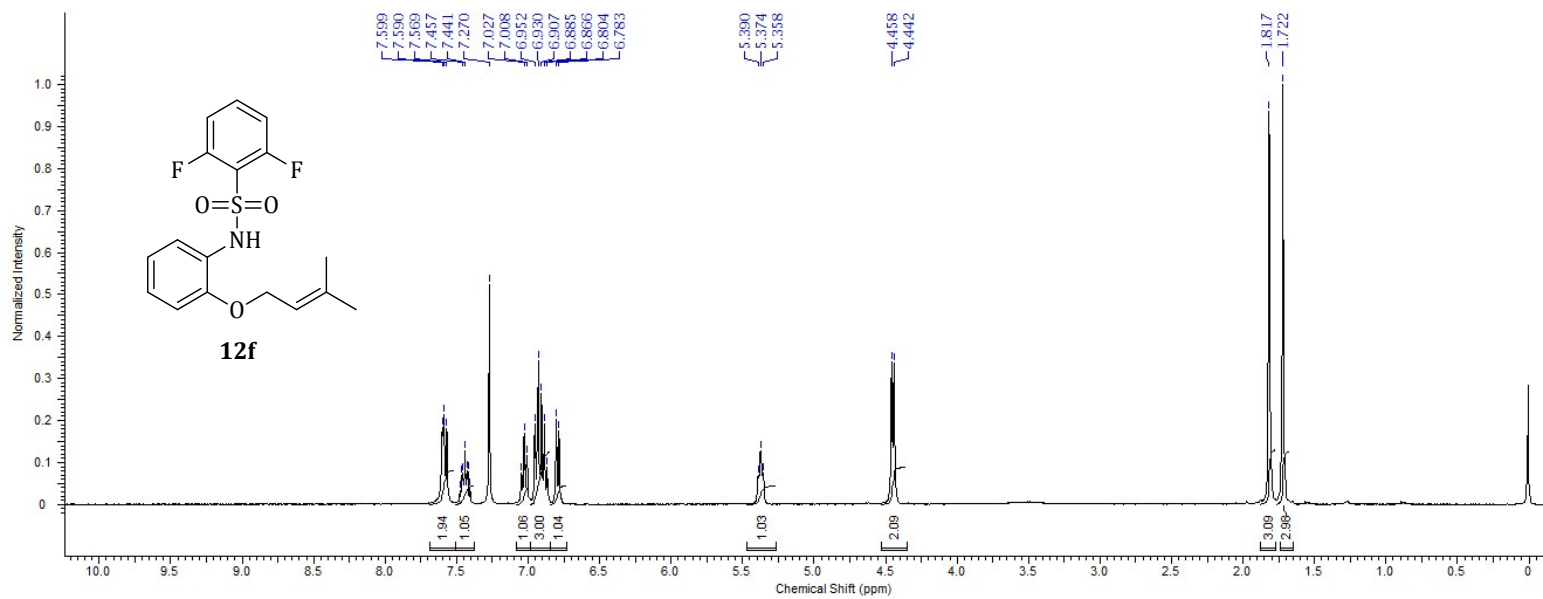

**<sup>1</sup>H NMR spectrum (400 MHz, CDCl<sub>3</sub>) of 12f**

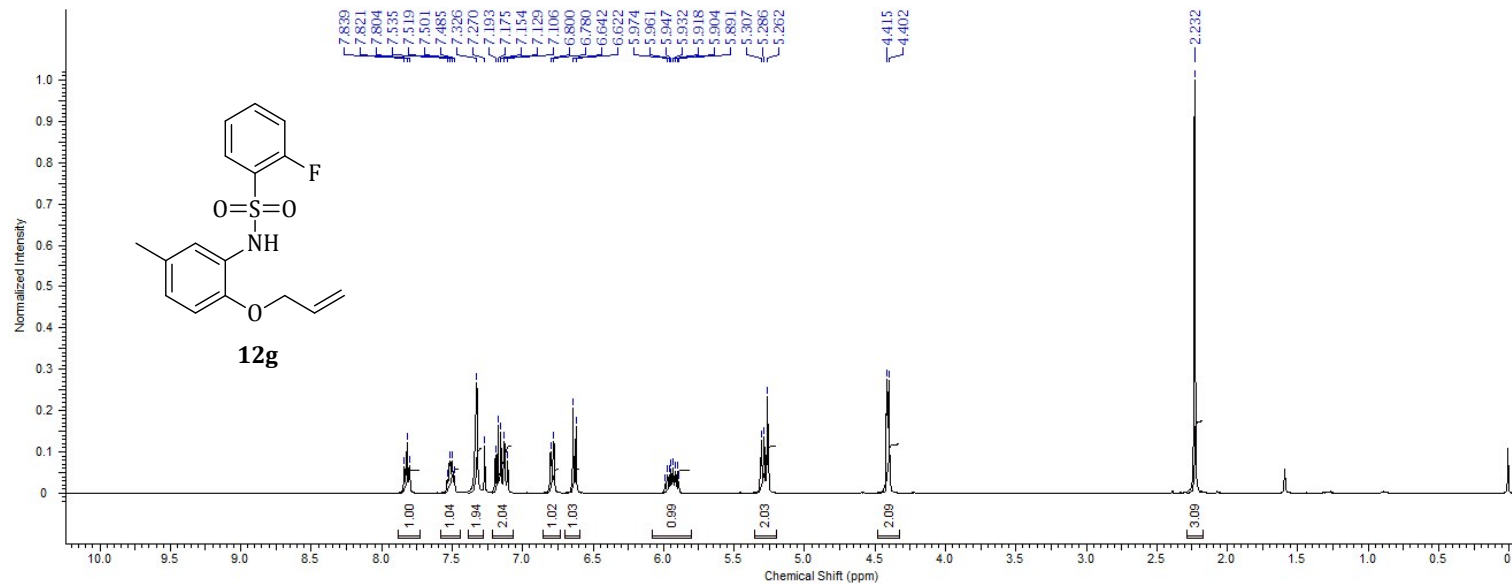

**<sup>1</sup>H NMR spectrum (400 MHz, CDCl<sub>3</sub>) of 12g**

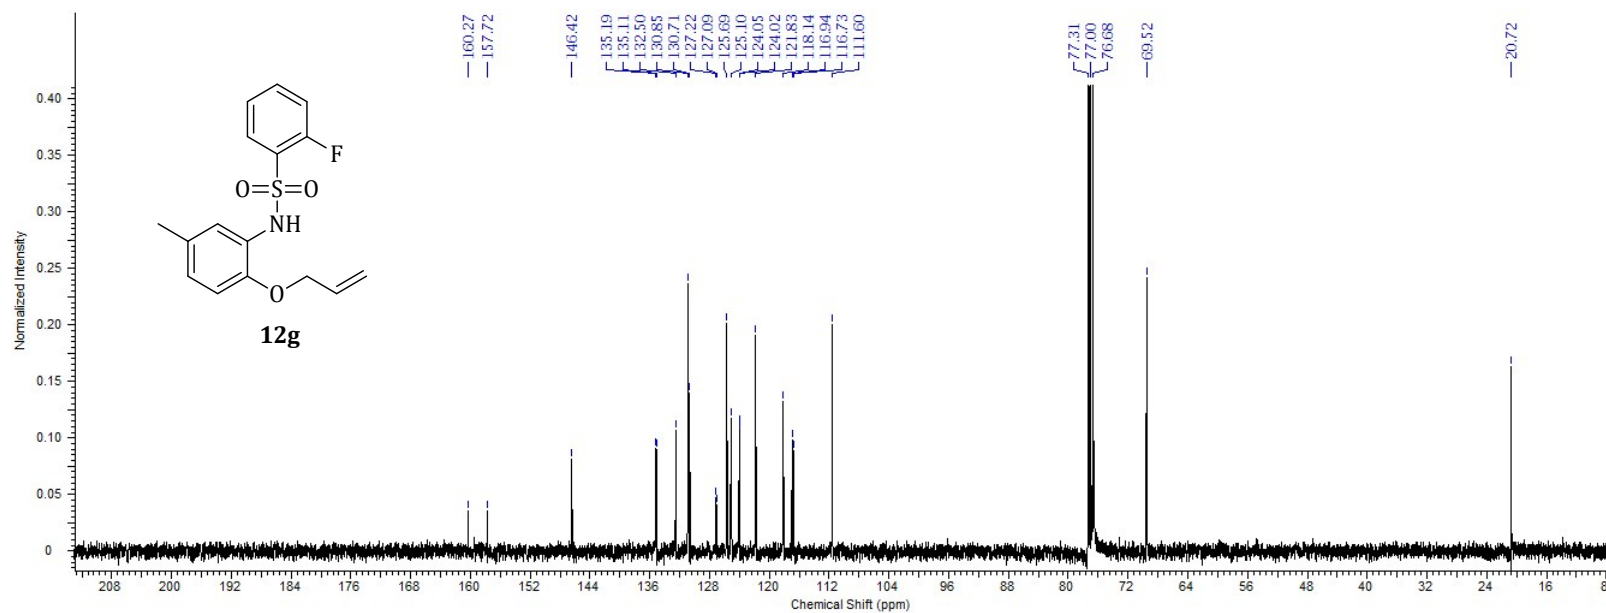

**<sup>13</sup>C NMR spectrum (100 MHz, CDCl<sub>3</sub>) of 12g**



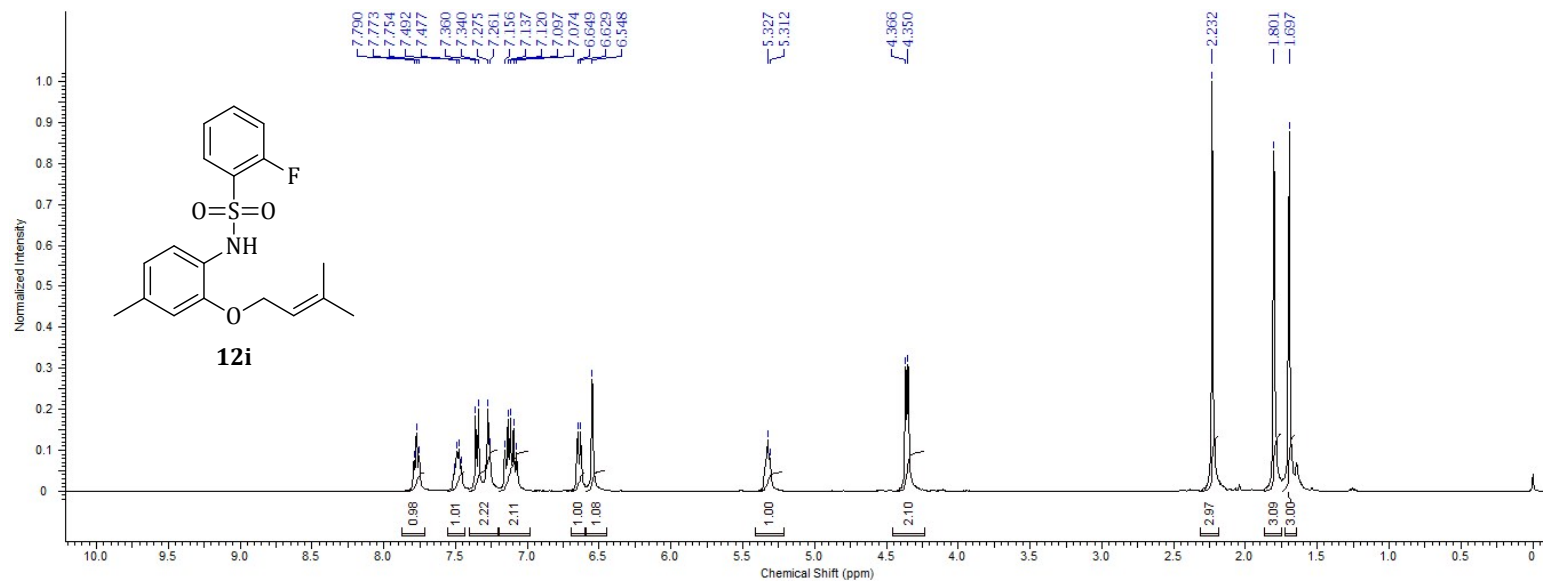

**$^1\text{H}$  NMR spectrum (400 MHz,  $\text{CDCl}_3$ ) of 12i**

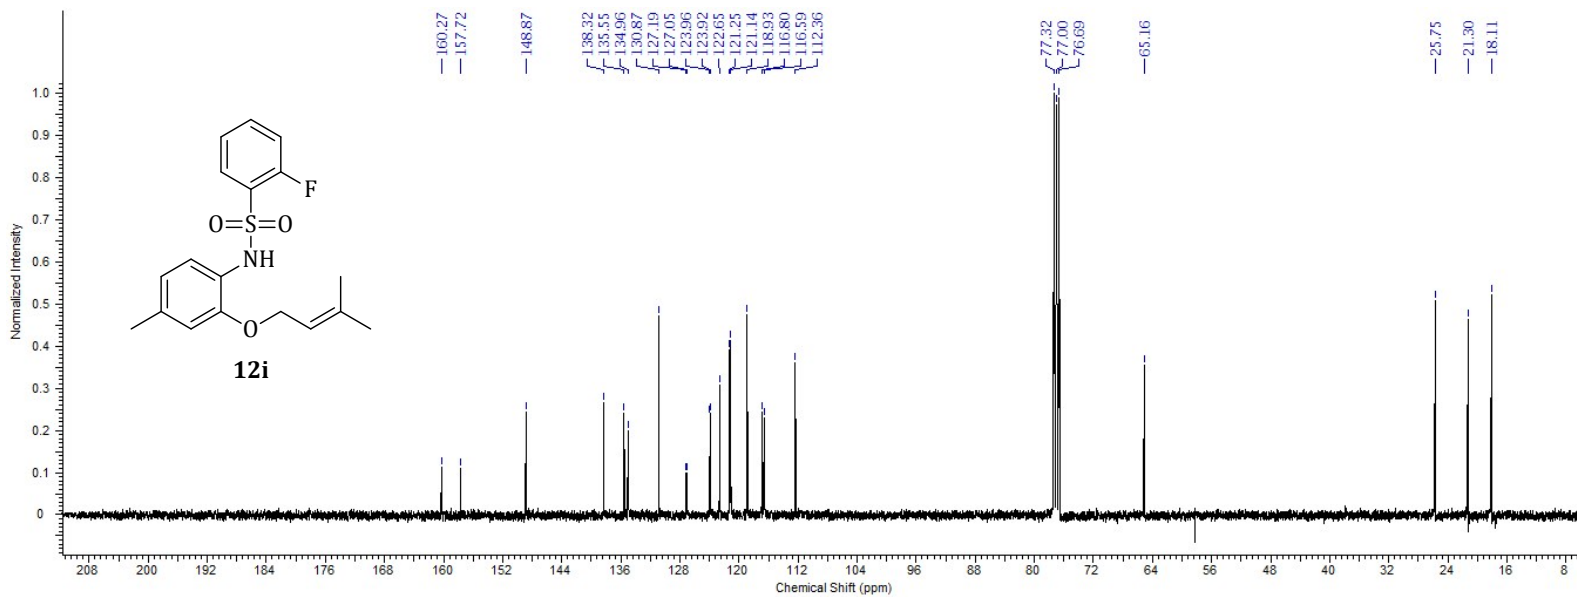

**$^{13}\text{C}$  NMR spectrum (100 MHz,  $\text{CDCl}_3$ ) of 12i**

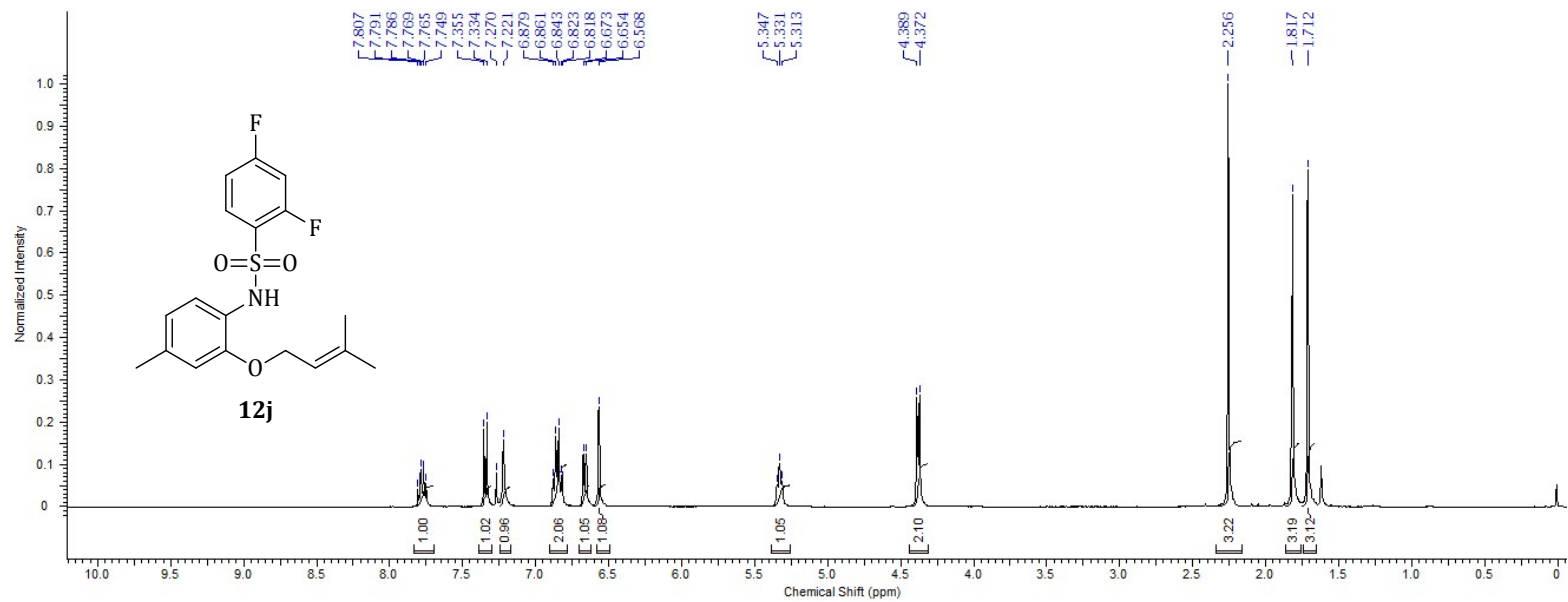

**<sup>1</sup>H NMR spectrum (400 MHz, CDCl<sub>3</sub>) of **12j****

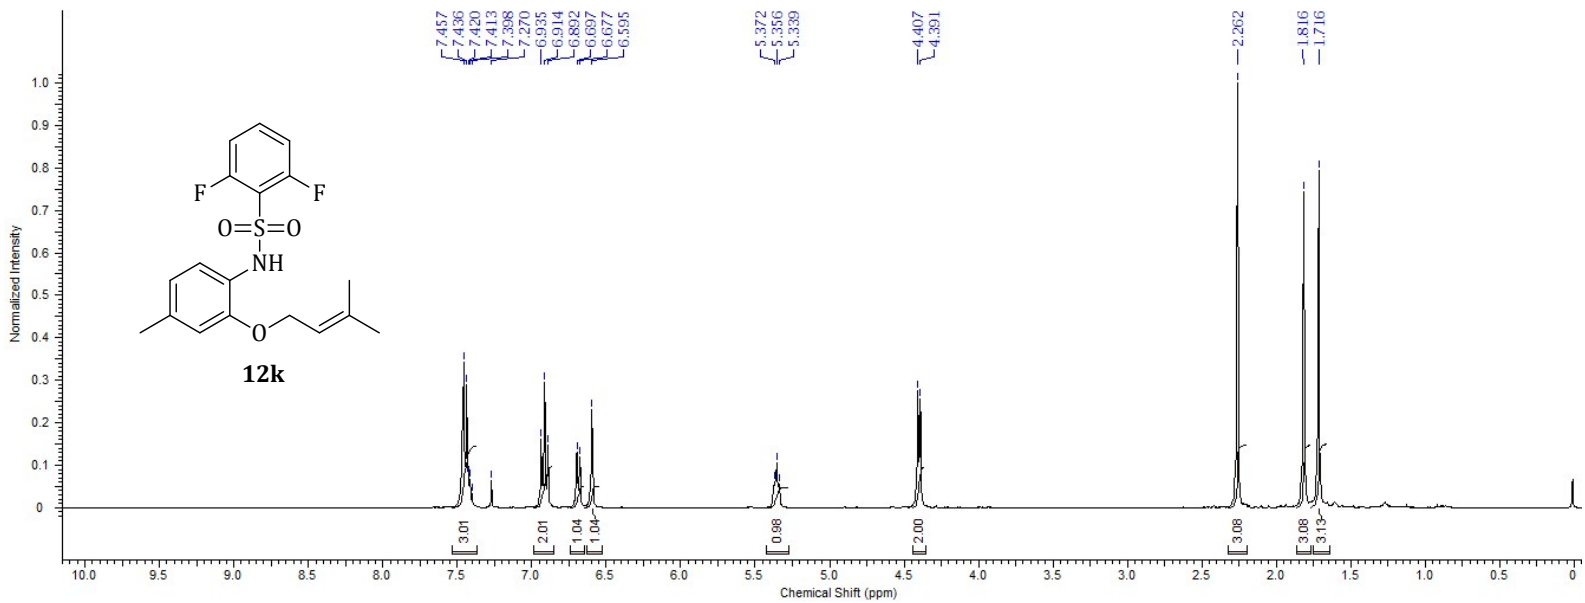

**<sup>1</sup>H NMR spectrum (400 MHz, CDCl<sub>3</sub>) of 12k**

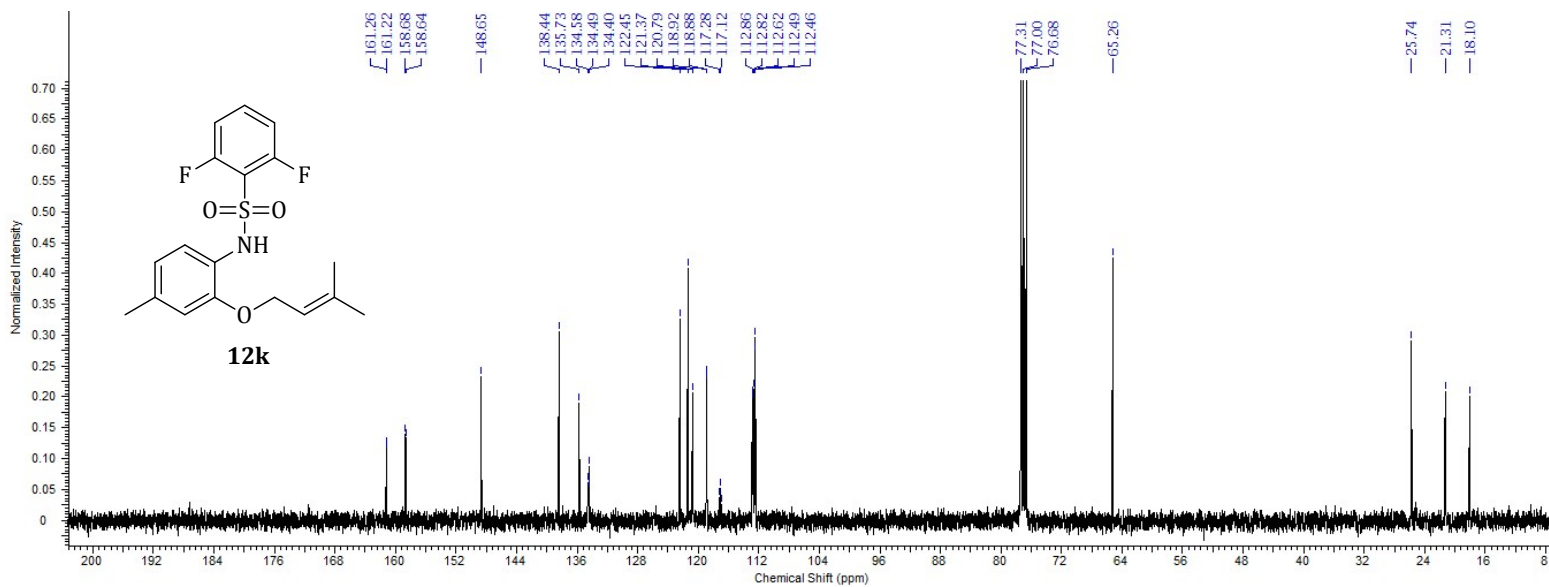

**<sup>13</sup>C NMR spectrum (100 MHz, CDCl<sub>3</sub>) of 12k**

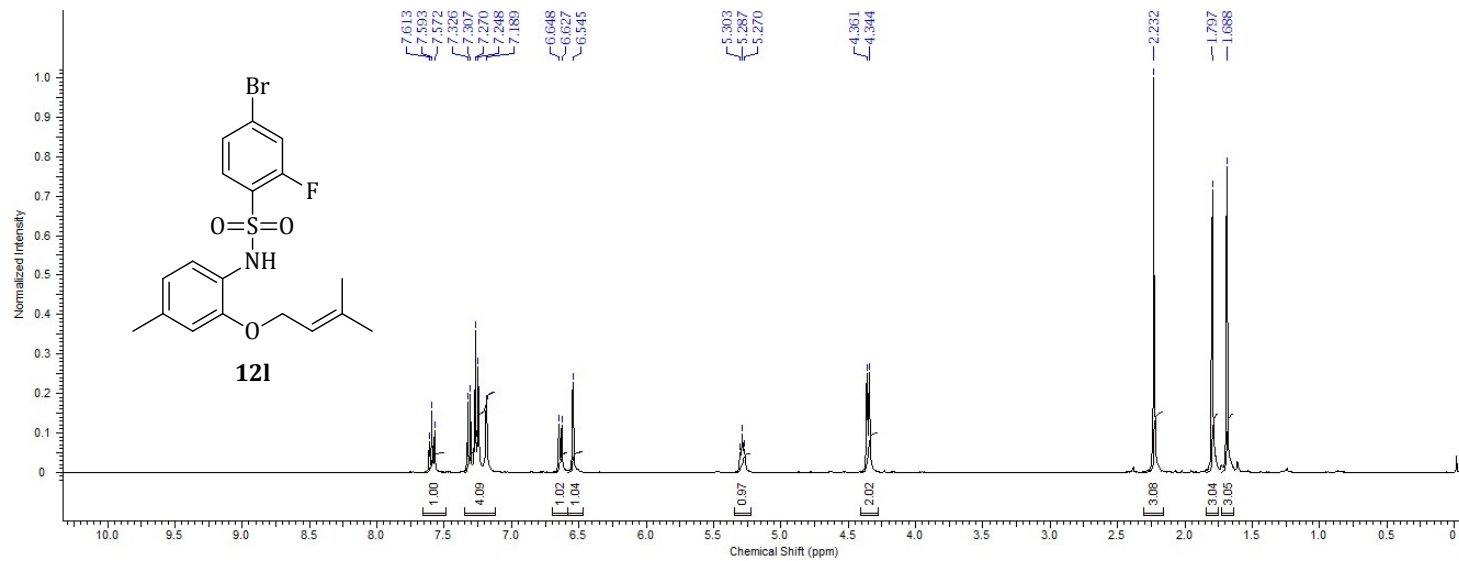

**<sup>1</sup>H NMR spectrum (400 MHz, CDCl<sub>3</sub>) of 12l**

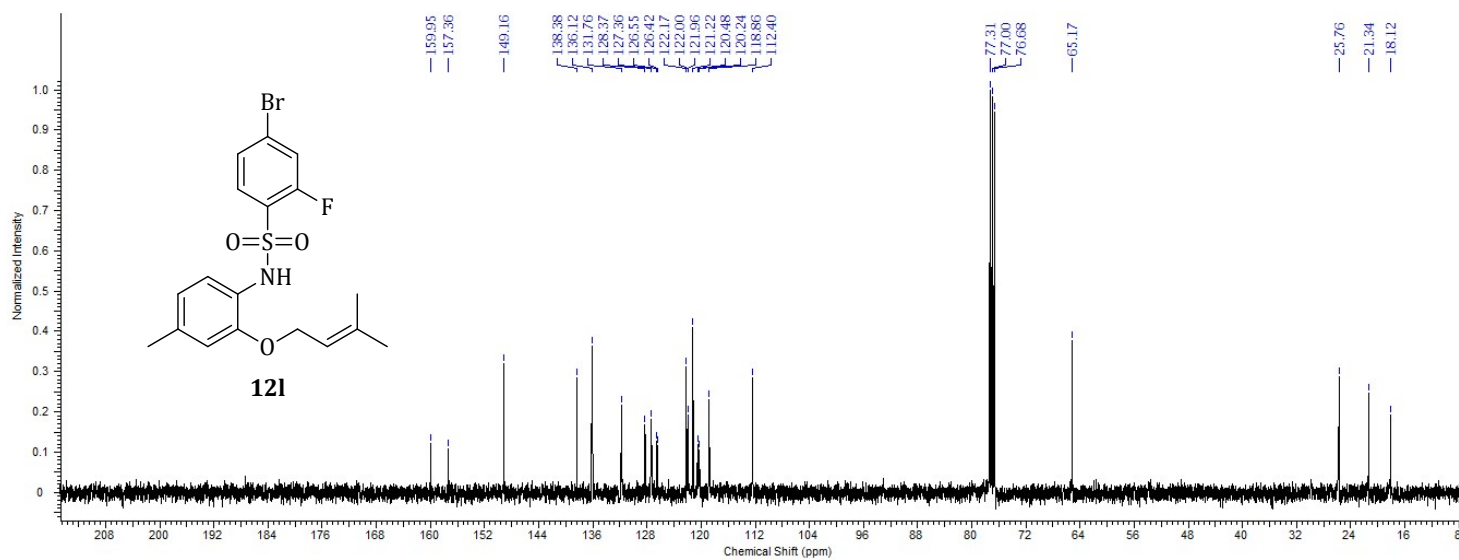

**<sup>13</sup>C NMR spectrum (100 MHz, CDCl<sub>3</sub>) of 12l**

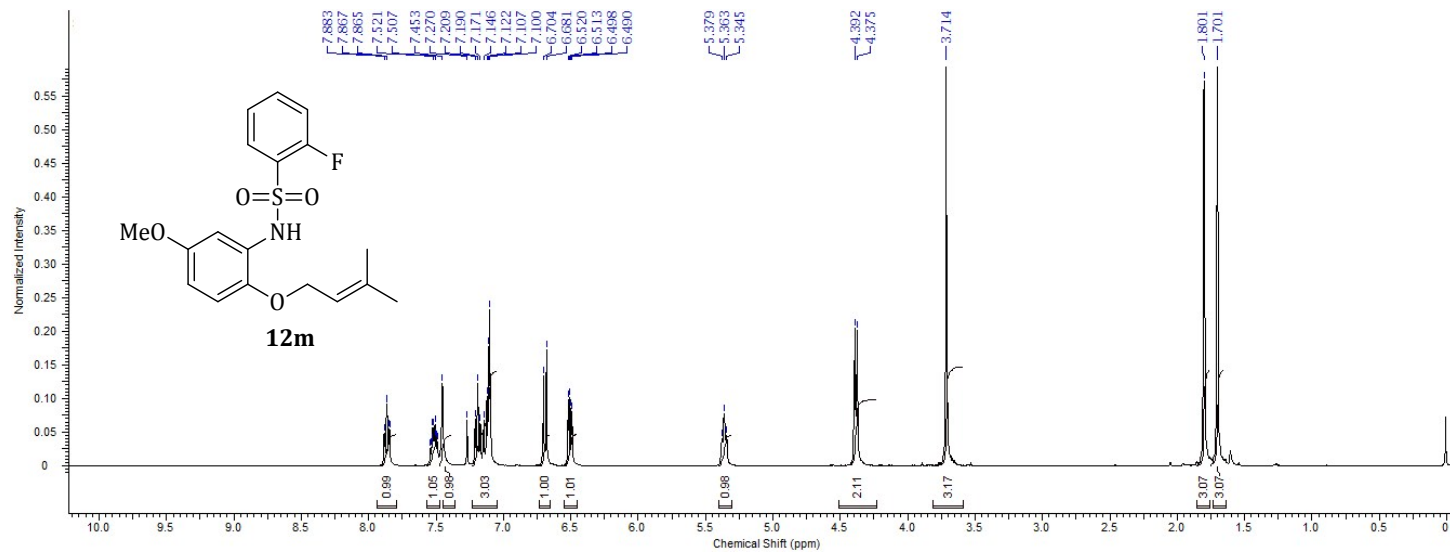

**<sup>1</sup>H NMR spectrum (400 MHz, CDCl<sub>3</sub>) of 12m**

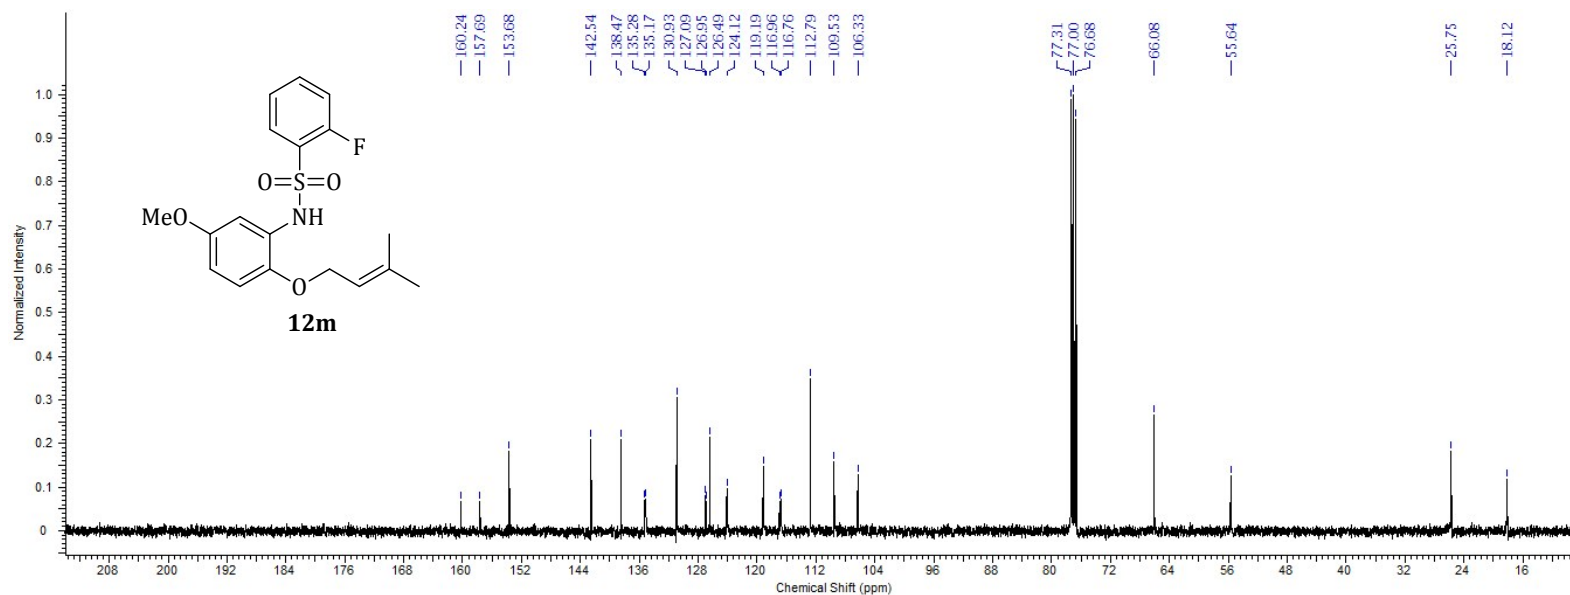

**<sup>13</sup>C NMR spectrum (100 MHz, CDCl<sub>3</sub>) of 12m**

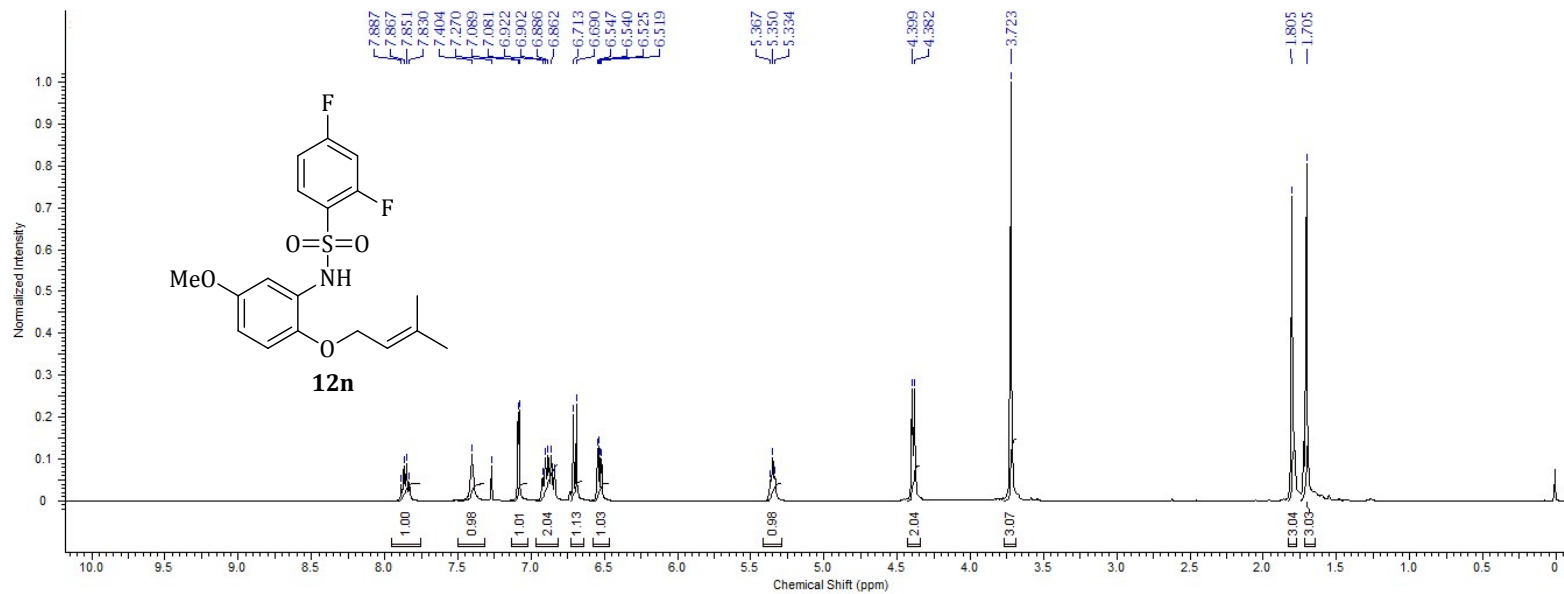

**<sup>1</sup>H NMR spectrum (400 MHz, CDCl<sub>3</sub>) of 12n**

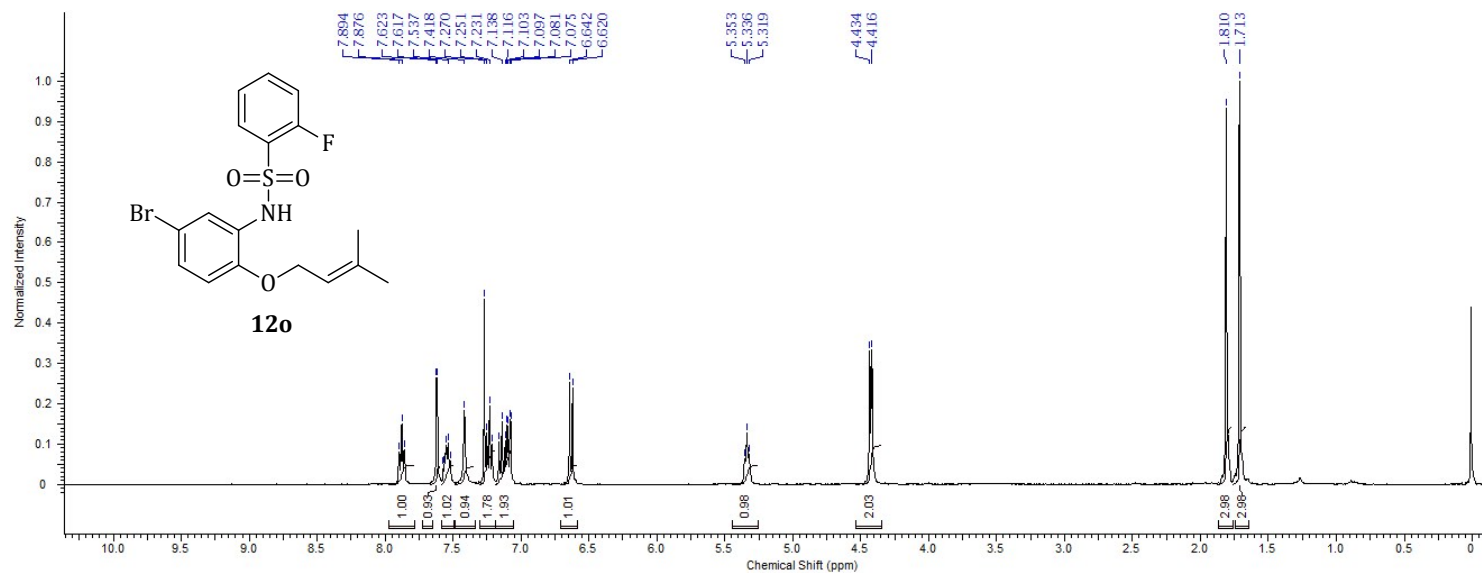

**<sup>1</sup>H NMR spectrum (400 MHz, CDCl<sub>3</sub>) of 12o**

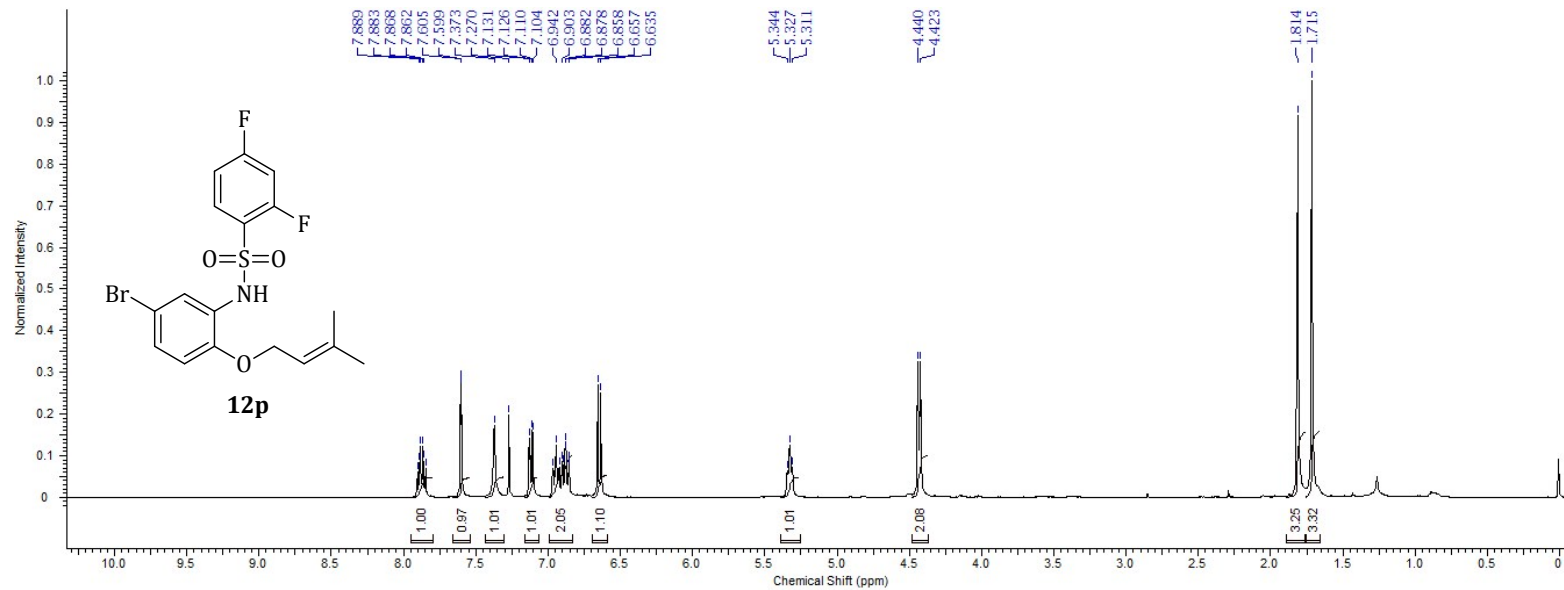

**<sup>1</sup>H NMR spectrum (400 MHz, CDCl<sub>3</sub>) of 12p**

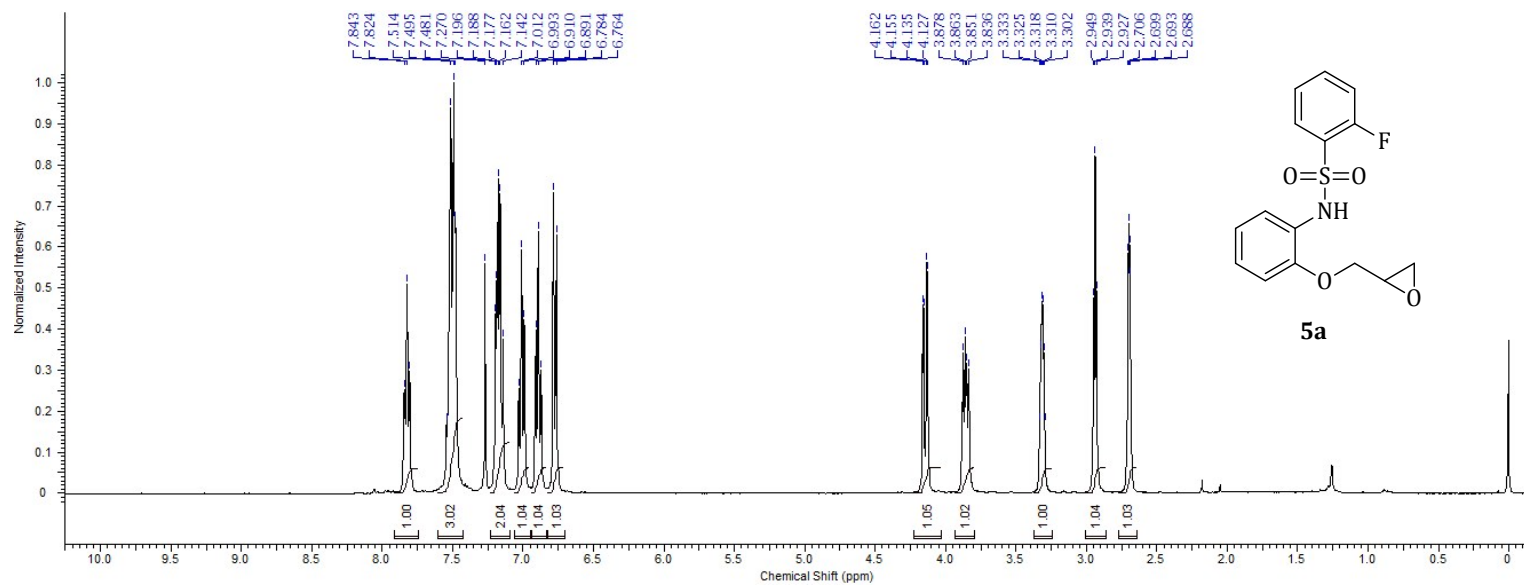

**<sup>1</sup>H NMR spectrum (400 MHz, CDCl<sub>3</sub>) of 5a**

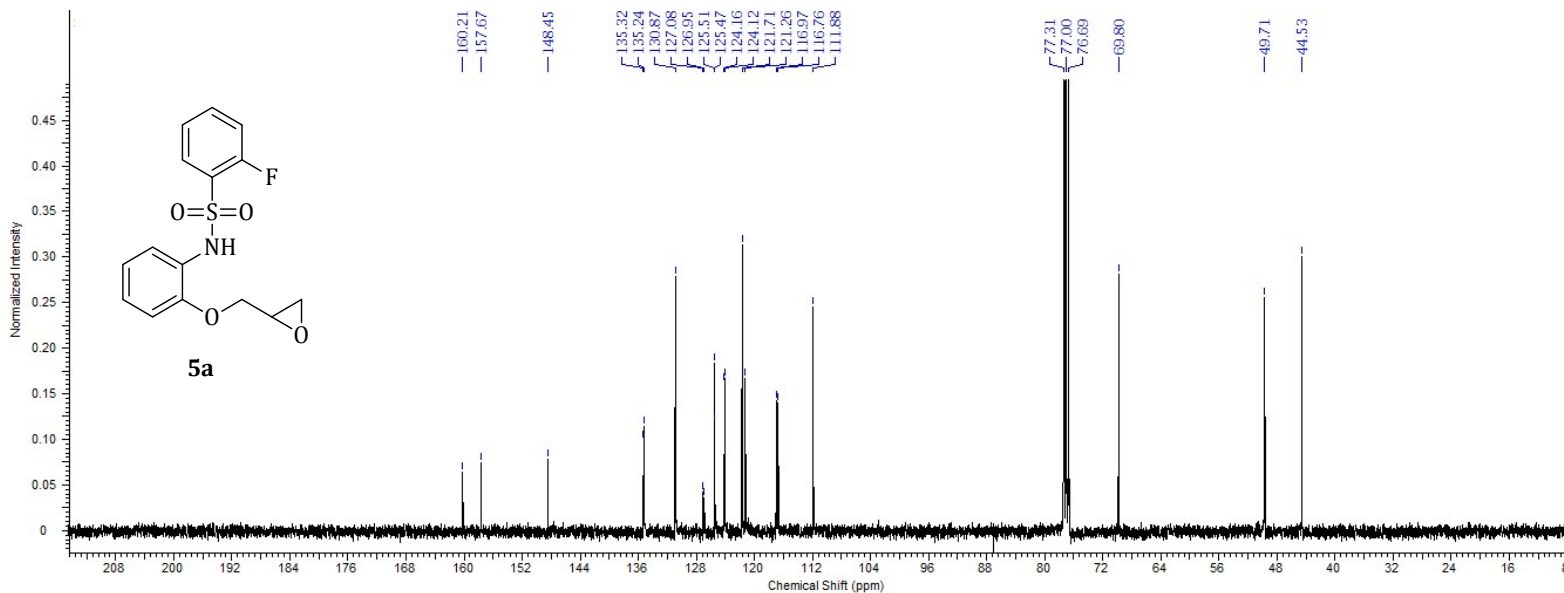

**13C NMR spectrum (100 MHz, CDCl<sub>3</sub>) of 5a**

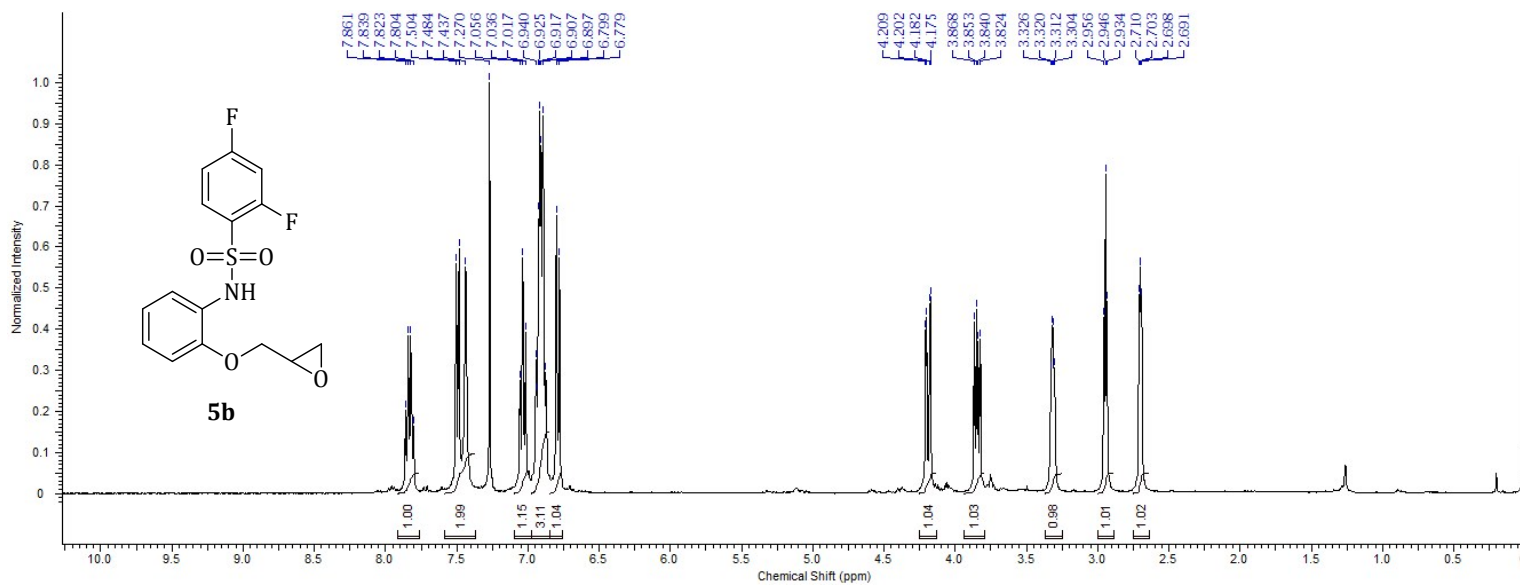

**1H NMR spectrum (400 MHz, CDCl<sub>3</sub>) of 5b**



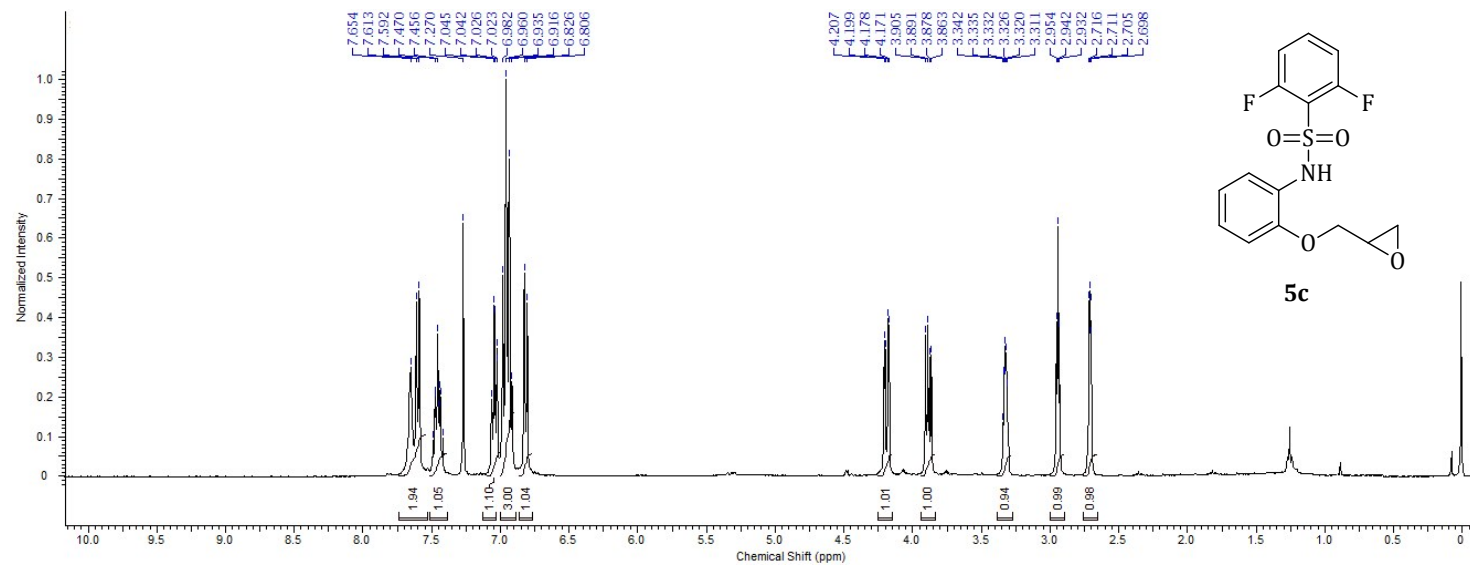

**<sup>1</sup>H NMR spectrum (400 MHz, CDCl<sub>3</sub>) of 5c**

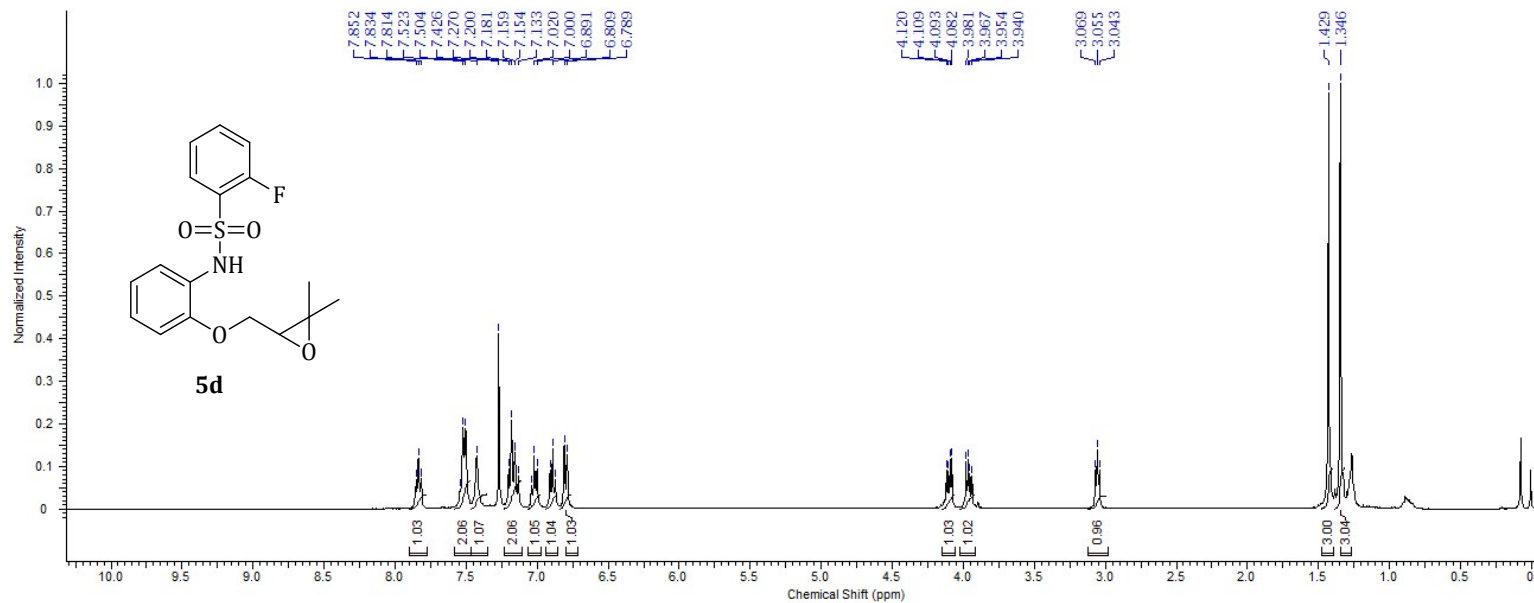

**<sup>1</sup>H NMR spectrum (400 MHz, CDCl<sub>3</sub>) of 5d**

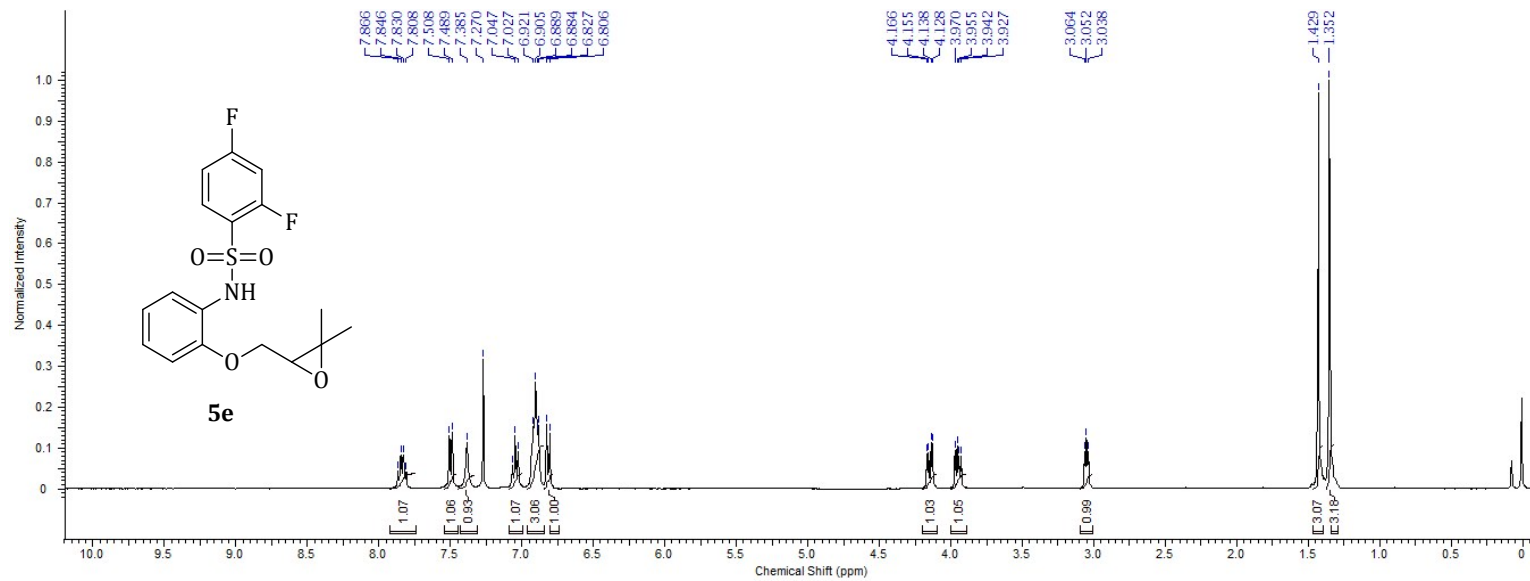

**<sup>1</sup>H NMR spectrum (400 MHz, CDCl<sub>3</sub>) of 5e**

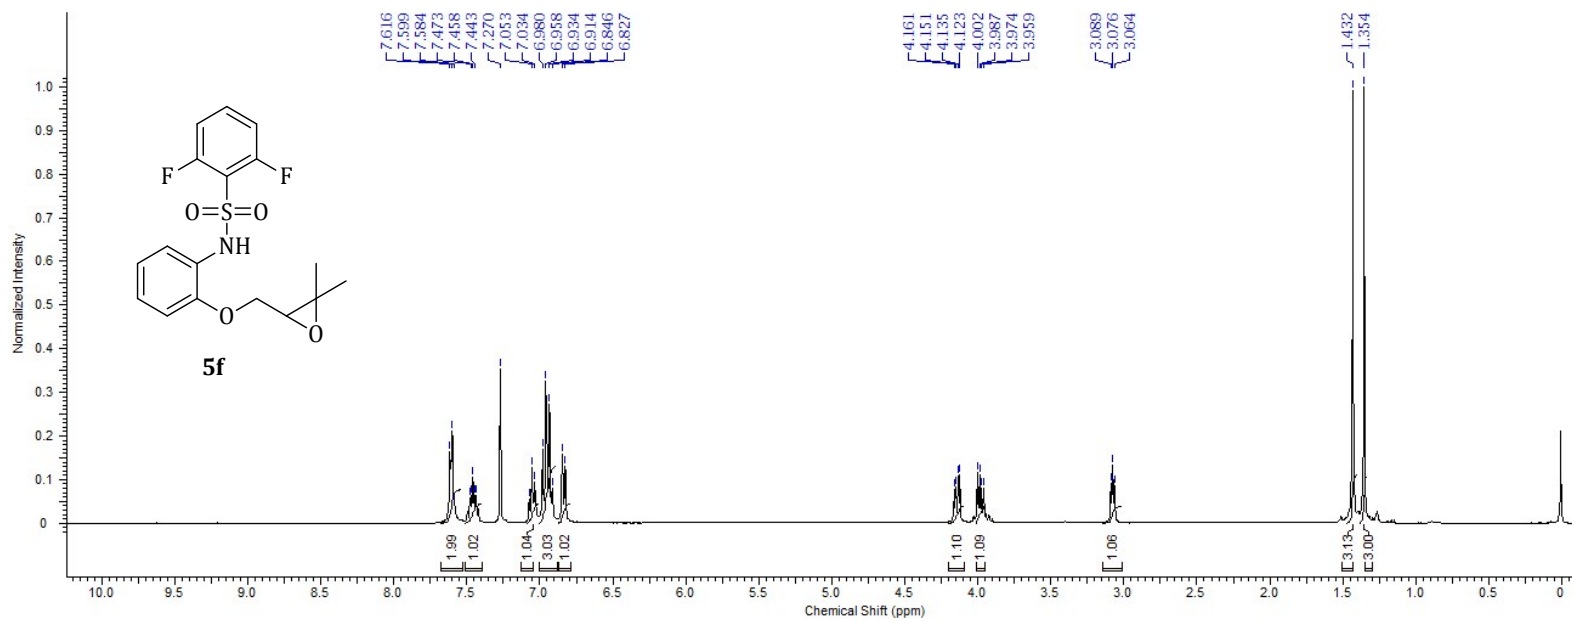

**<sup>1</sup>H NMR spectrum (400 MHz, CDCl<sub>3</sub>) of 5f**

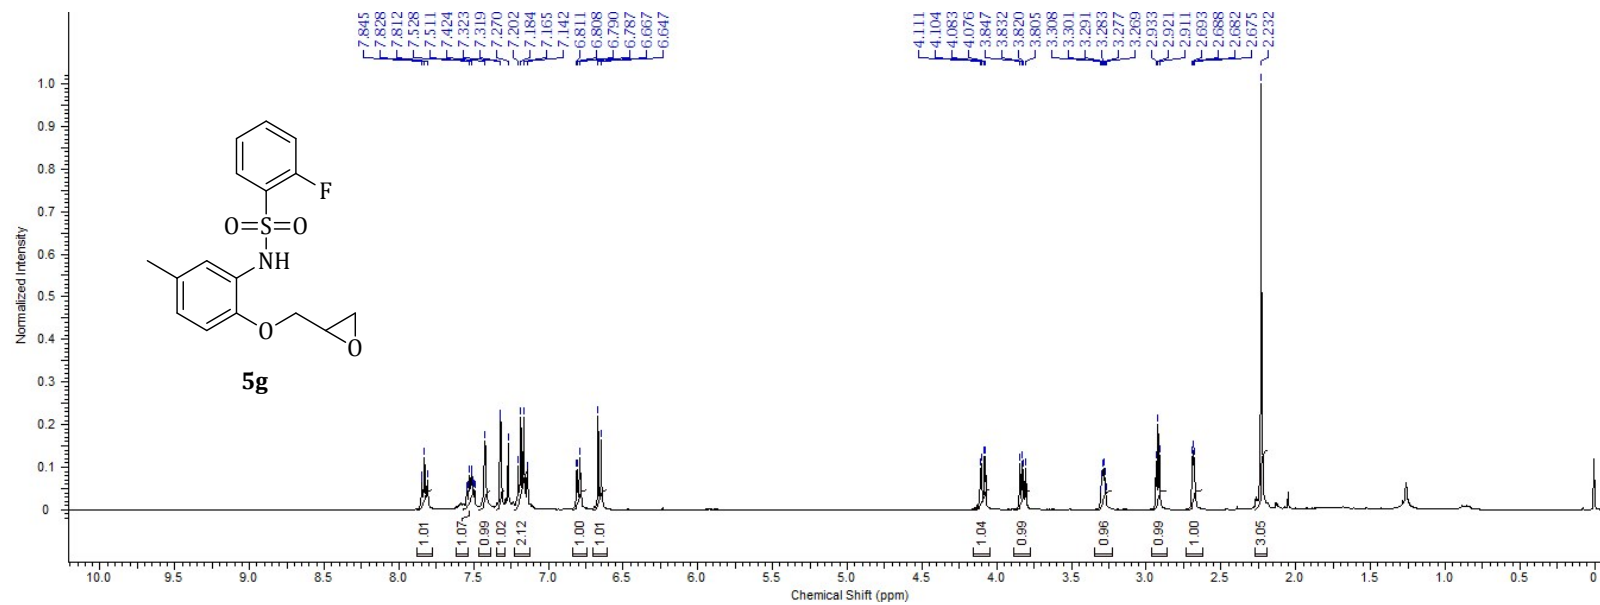

**<sup>1</sup>H NMR spectrum (400 MHz, CDCl<sub>3</sub>) of 5g**

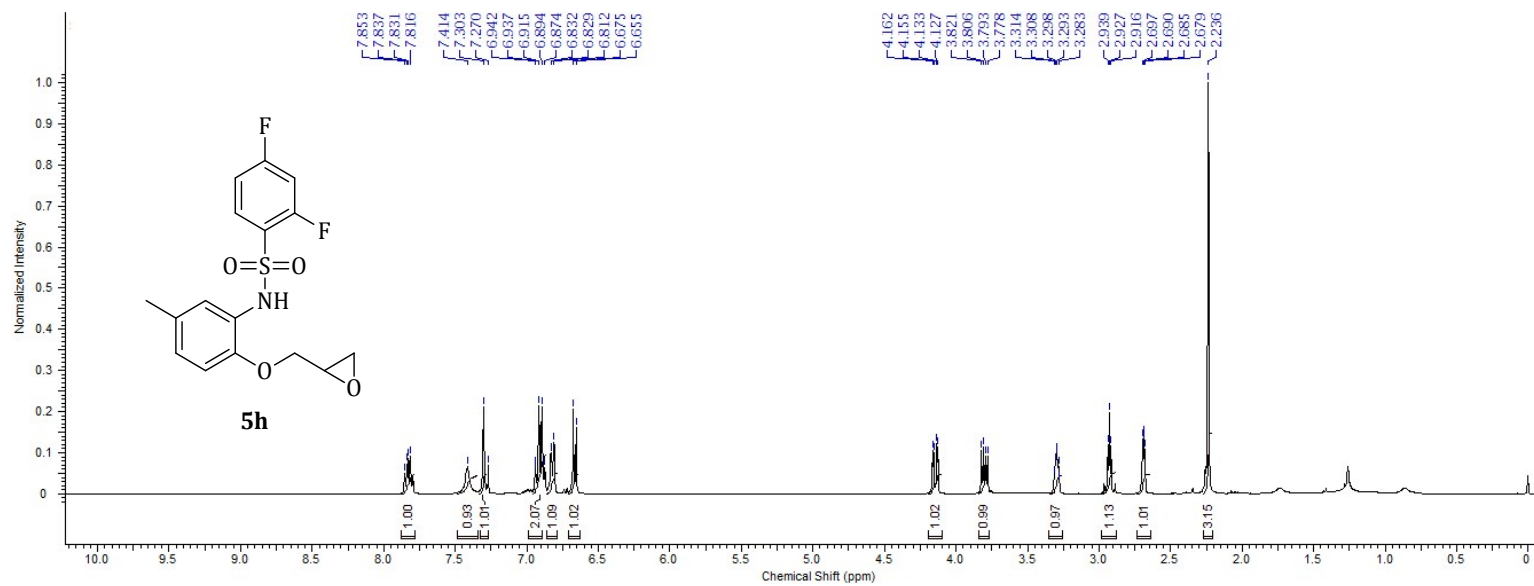

**<sup>1</sup>H NMR spectrum (400 MHz, CDCl<sub>3</sub>) of 5h**

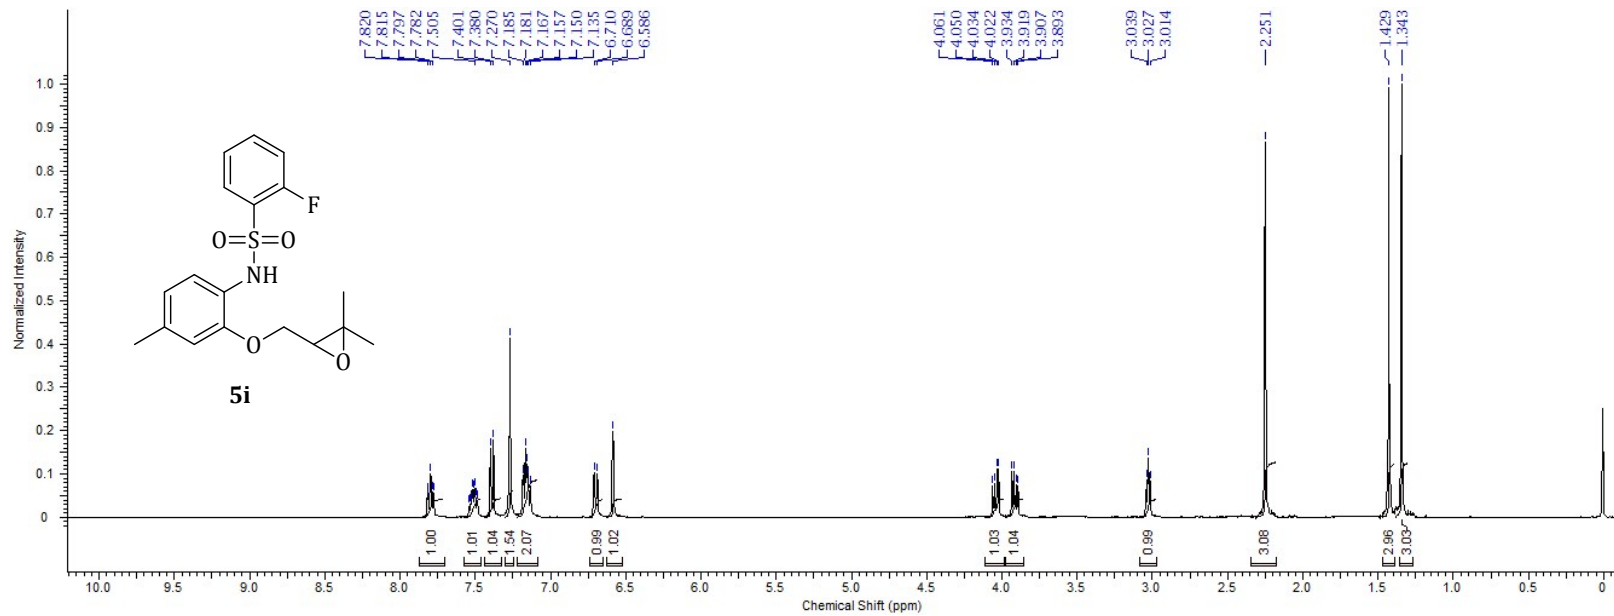

**<sup>1</sup>H NMR spectrum (400 MHz, CDCl<sub>3</sub>) of 5i**

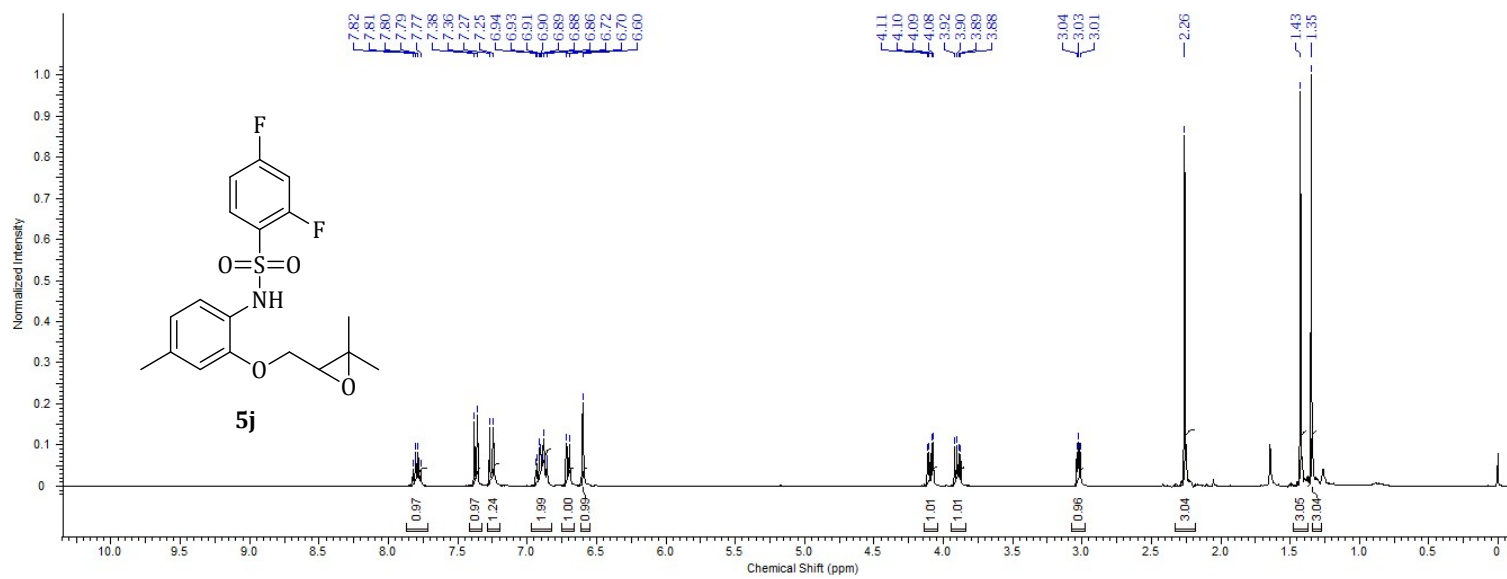

**<sup>1</sup>H NMR spectrum (400 MHz, CDCl<sub>3</sub>) of 5j**

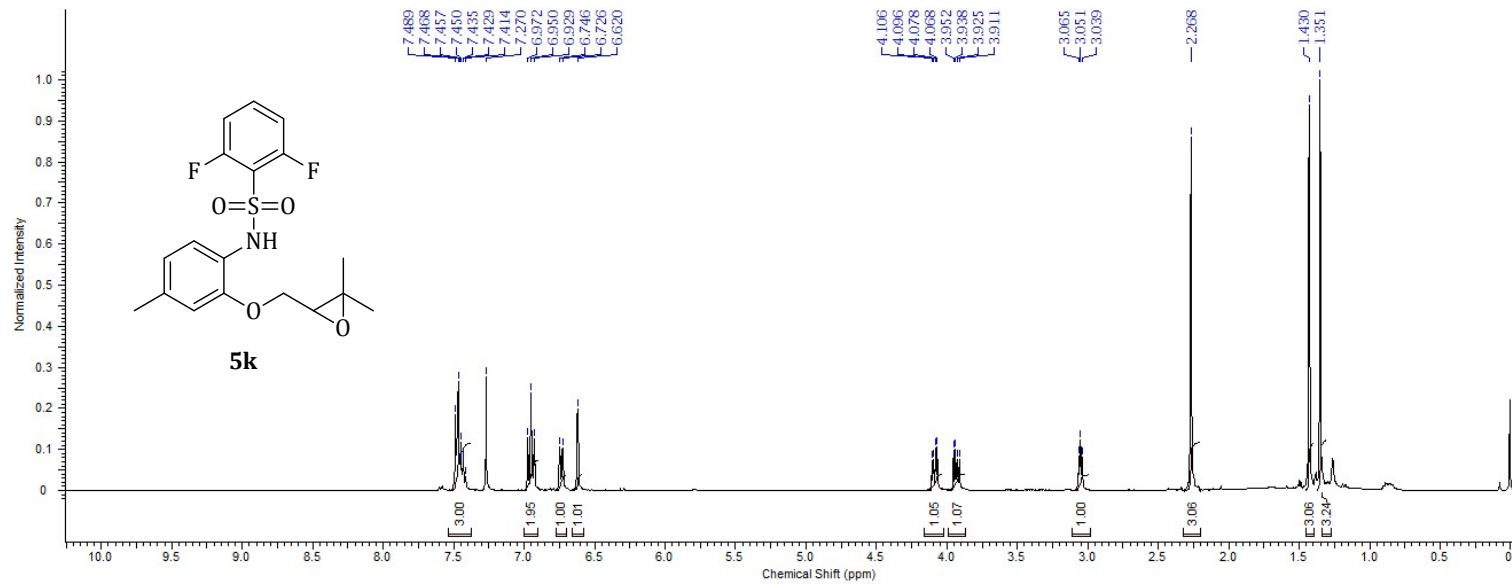

**<sup>1</sup>H NMR spectrum (400 MHz, CDCl<sub>3</sub>) of 5k**

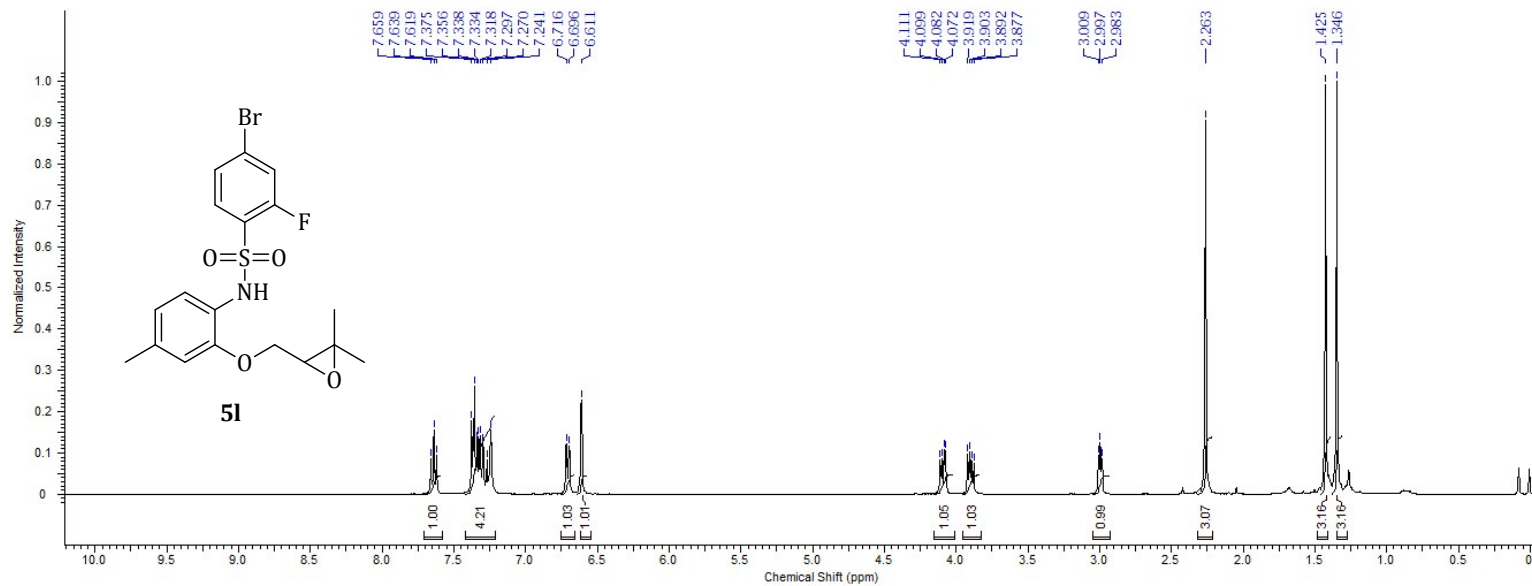

**<sup>1</sup>H NMR spectrum (400 MHz, CDCl<sub>3</sub>) of 5l**

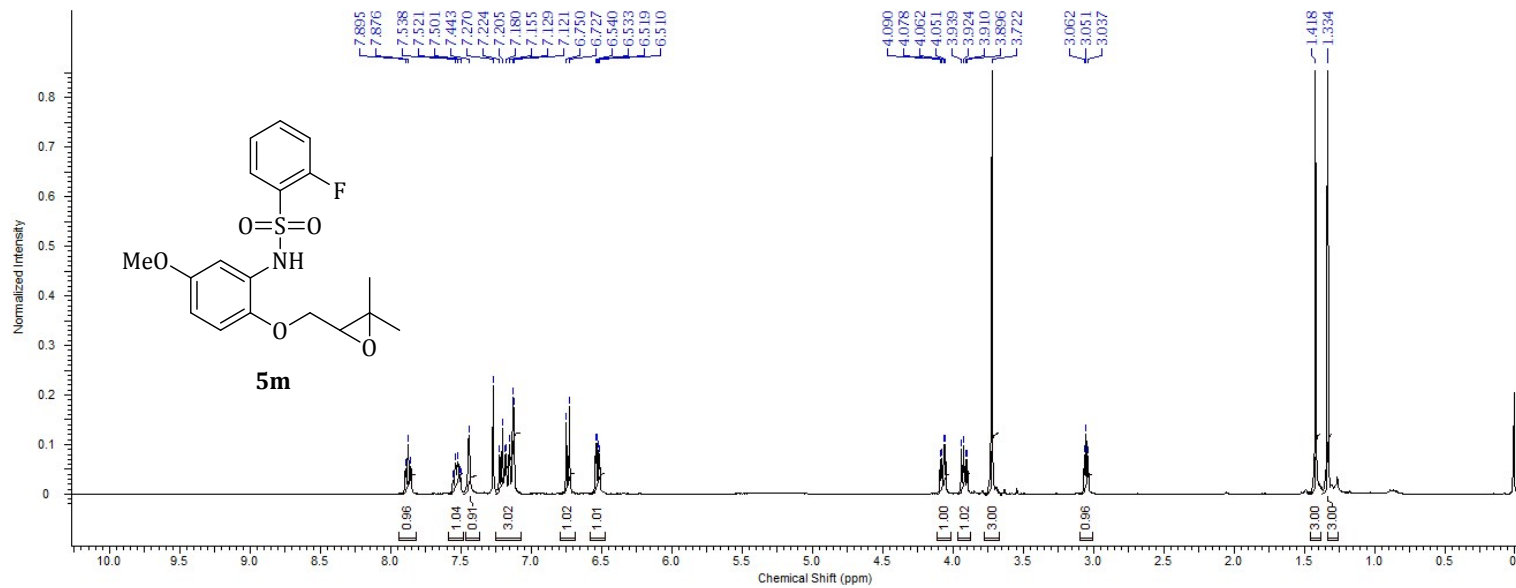

**<sup>1</sup>H NMR spectrum (400 MHz, CDCl<sub>3</sub>) of 5m**

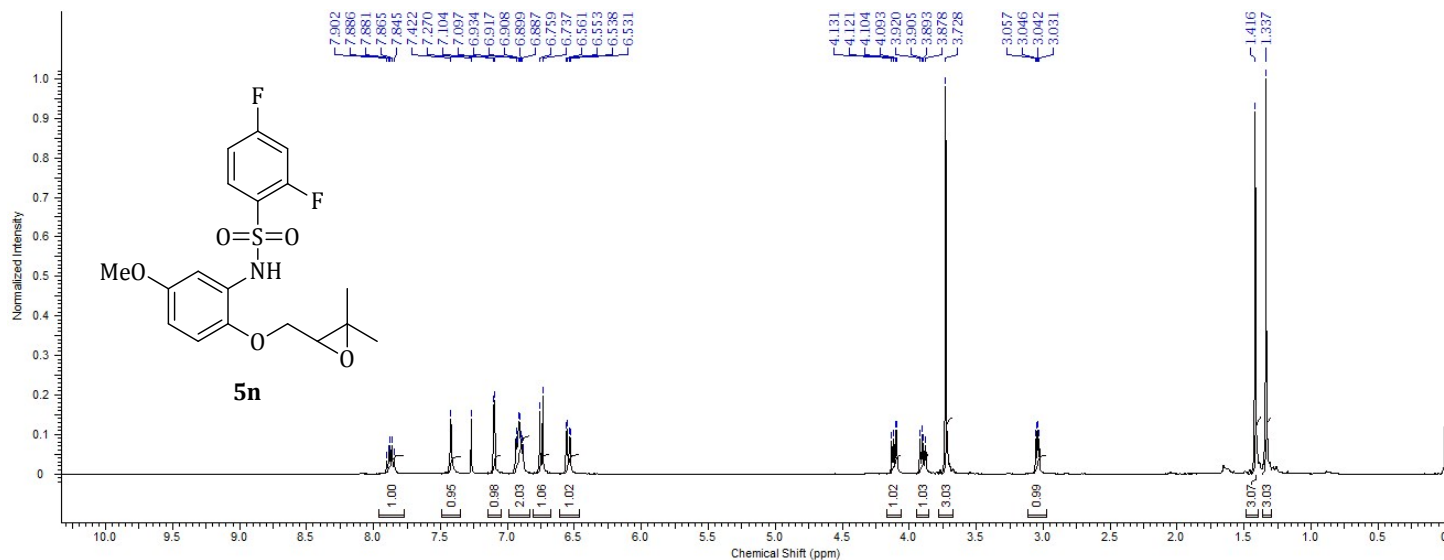

**<sup>1</sup>H NMR spectrum (400 MHz, CDCl<sub>3</sub>) of 5n**

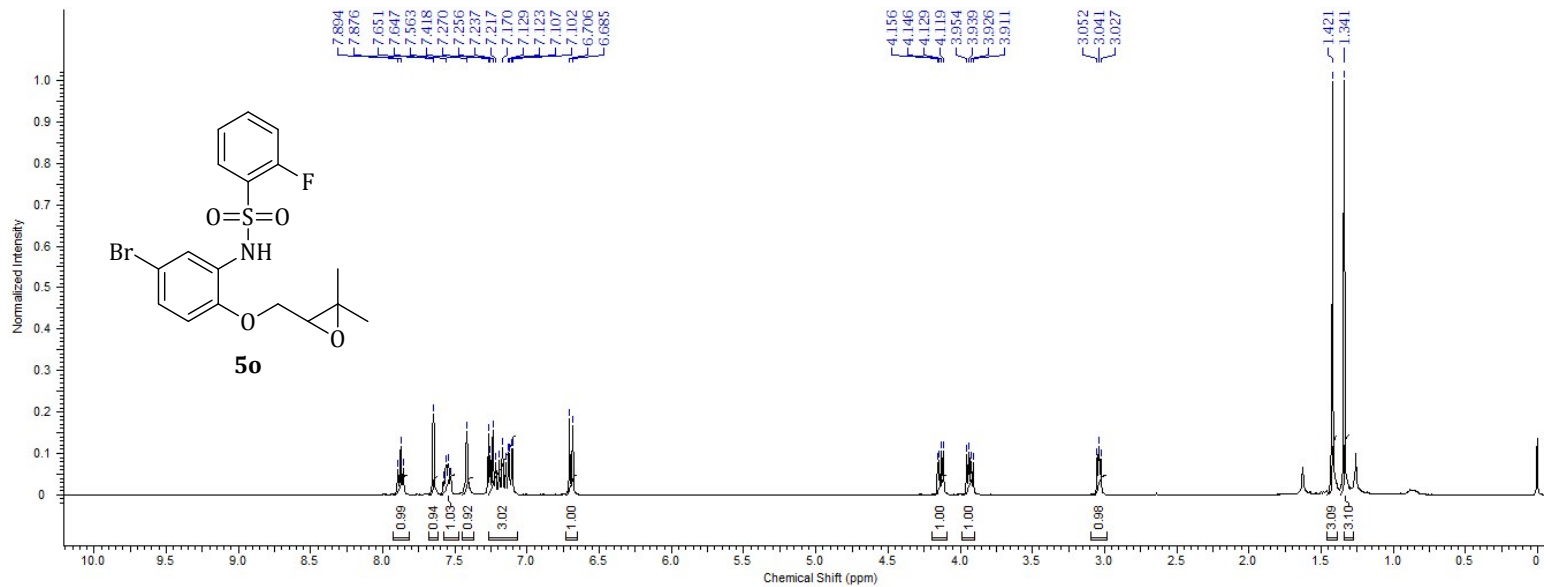

**<sup>1</sup>H NMR spectrum (400 MHz, CDCl<sub>3</sub>) of 5o**

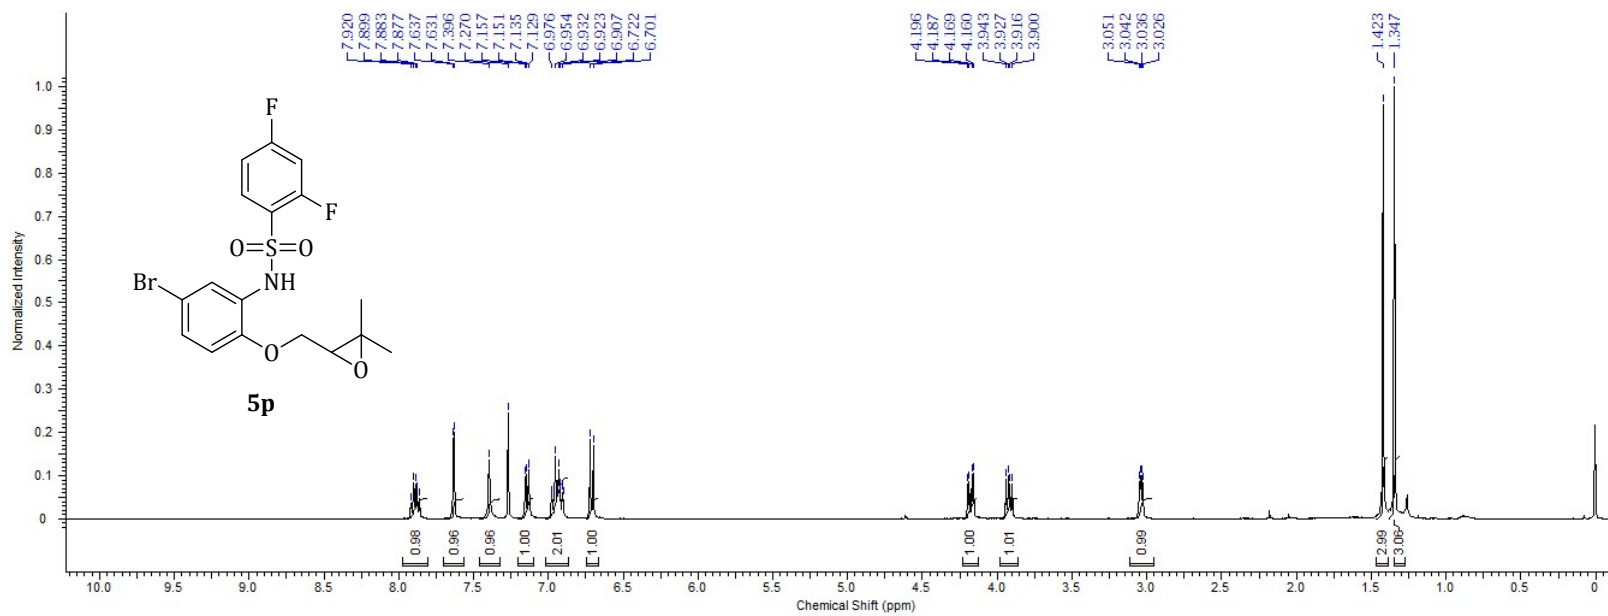

**<sup>1</sup>H NMR spectrum (400 MHz, CDCl<sub>3</sub>) of 5p**

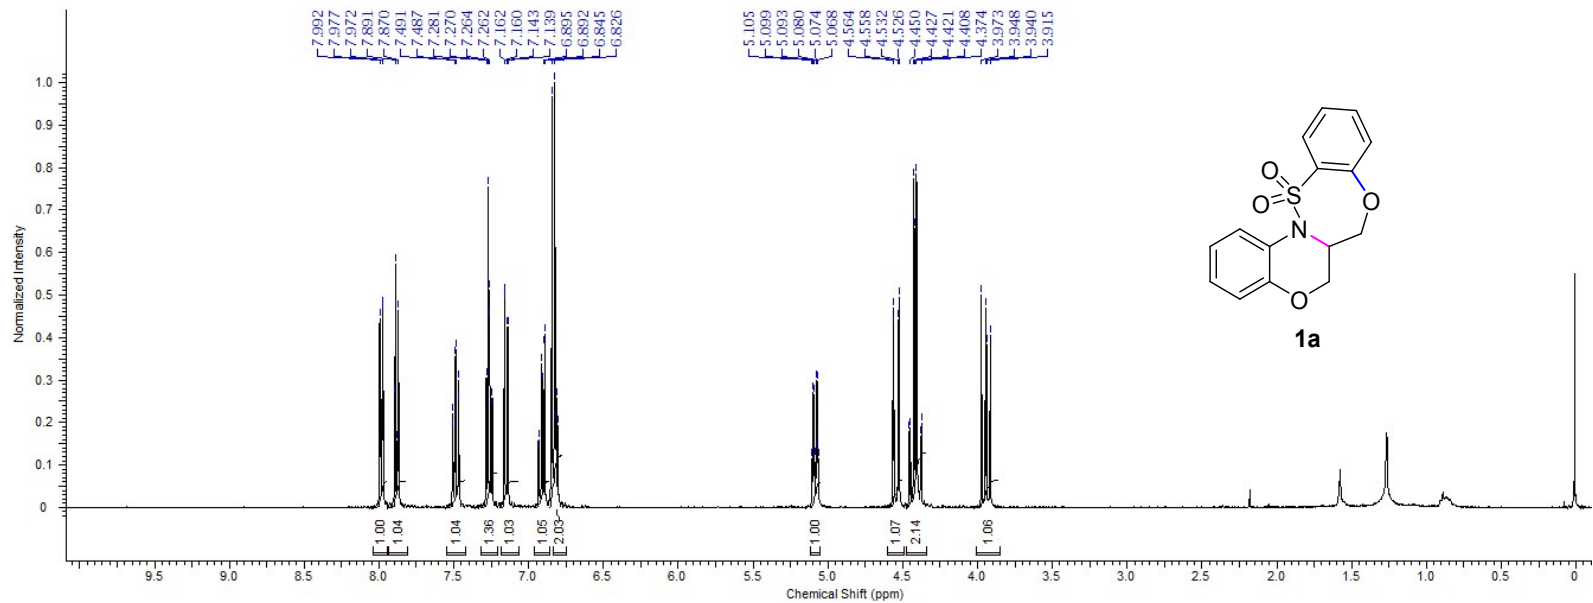

**<sup>1</sup>H NMR spectrum (400 MHz, CDCl<sub>3</sub>) of 1a**

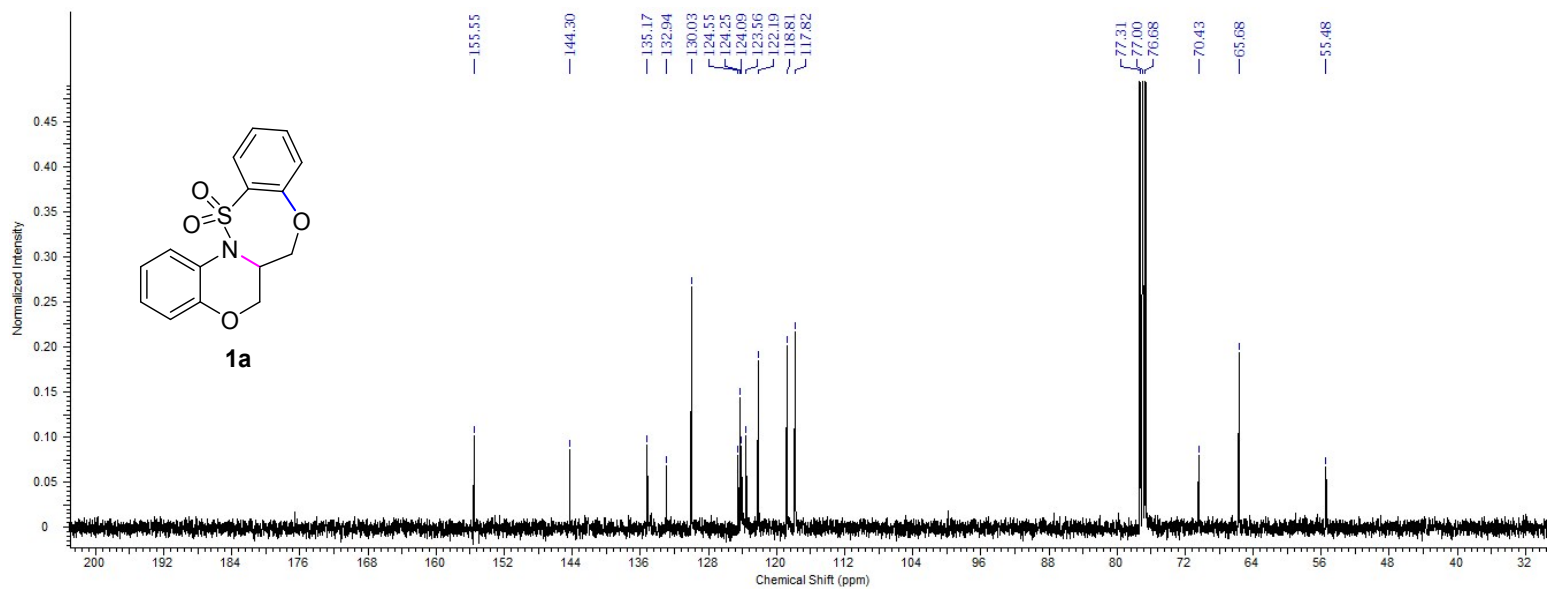

**<sup>13</sup>C NMR spectrum (100 MHz, CDCl<sub>3</sub>) of 1a**



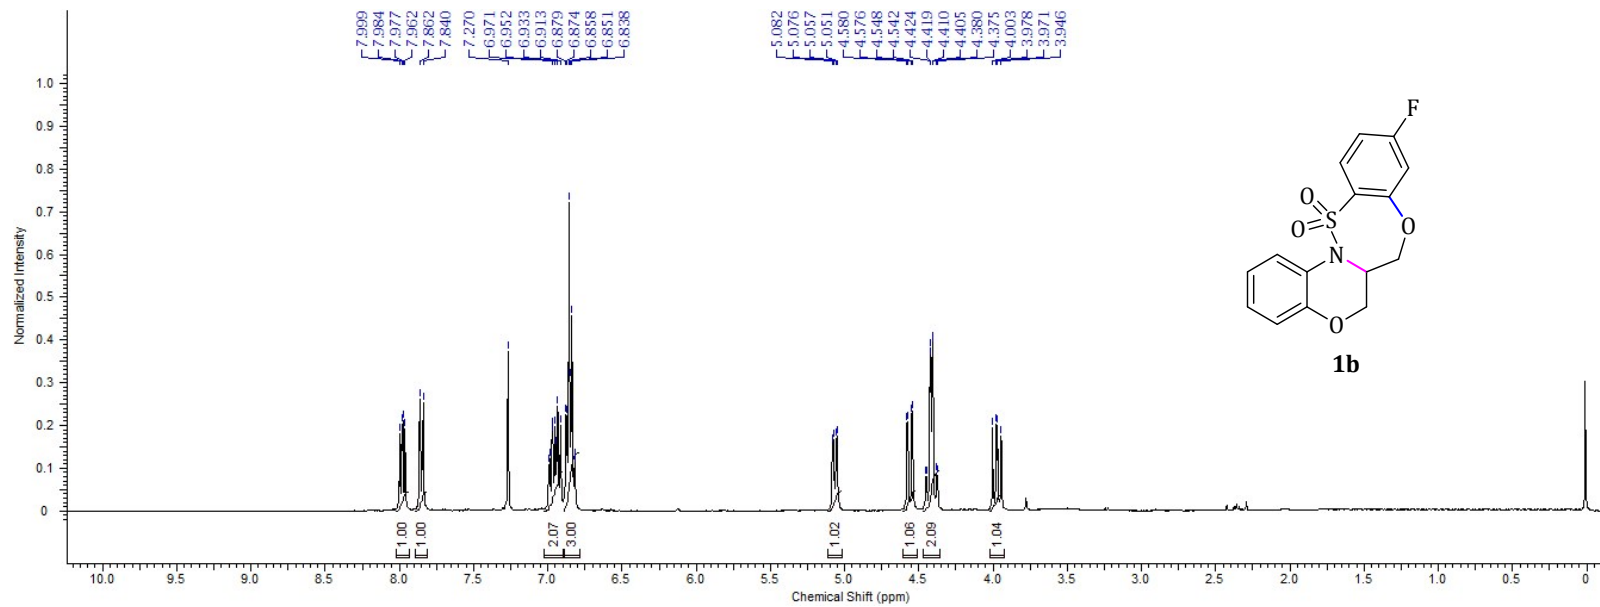

**<sup>1</sup>H NMR spectrum (400 MHz, CDCl<sub>3</sub>) of 1b**

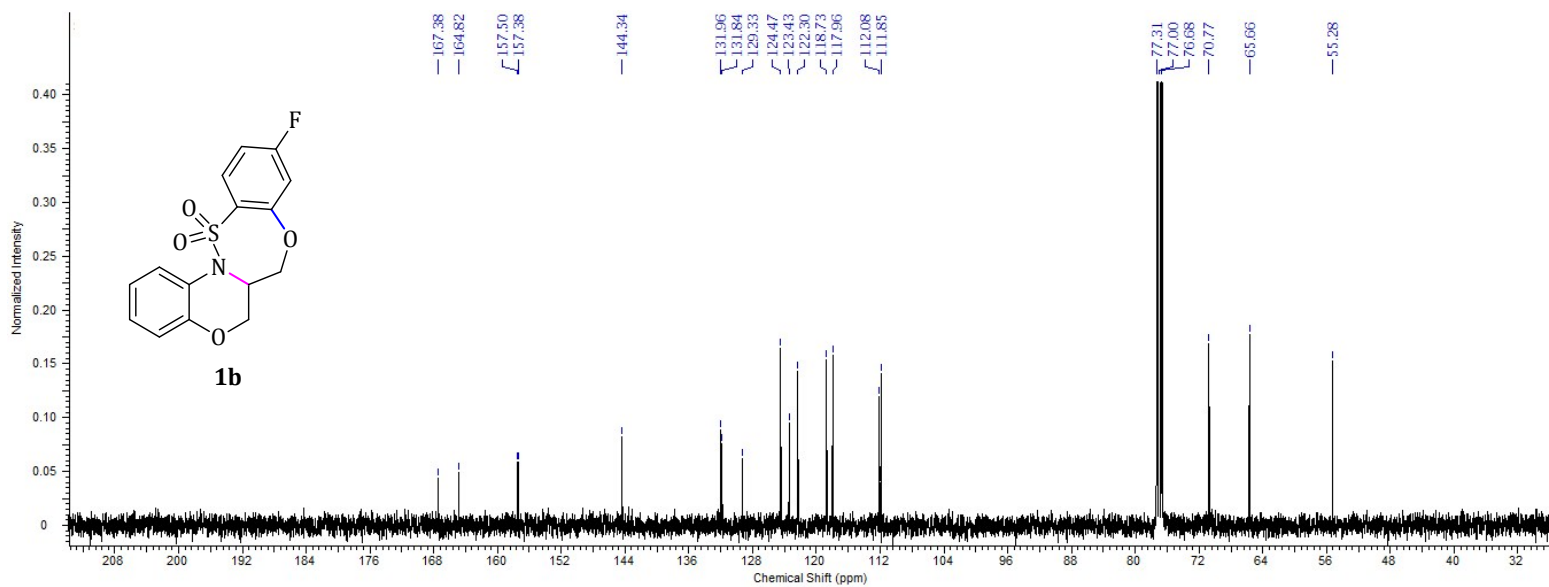

**<sup>13</sup>C NMR spectrum (100 MHz, CDCl<sub>3</sub>) of 1b**

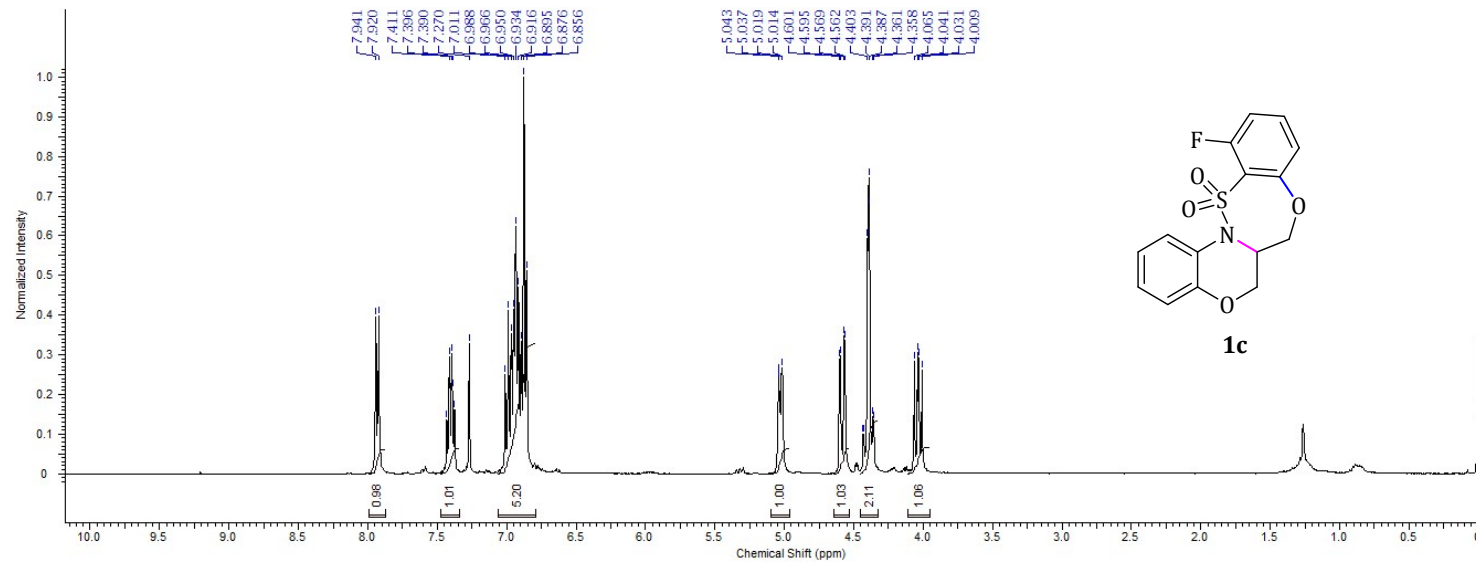

**<sup>1</sup>H NMR spectrum (400 MHz, CDCl<sub>3</sub>) of 1c**

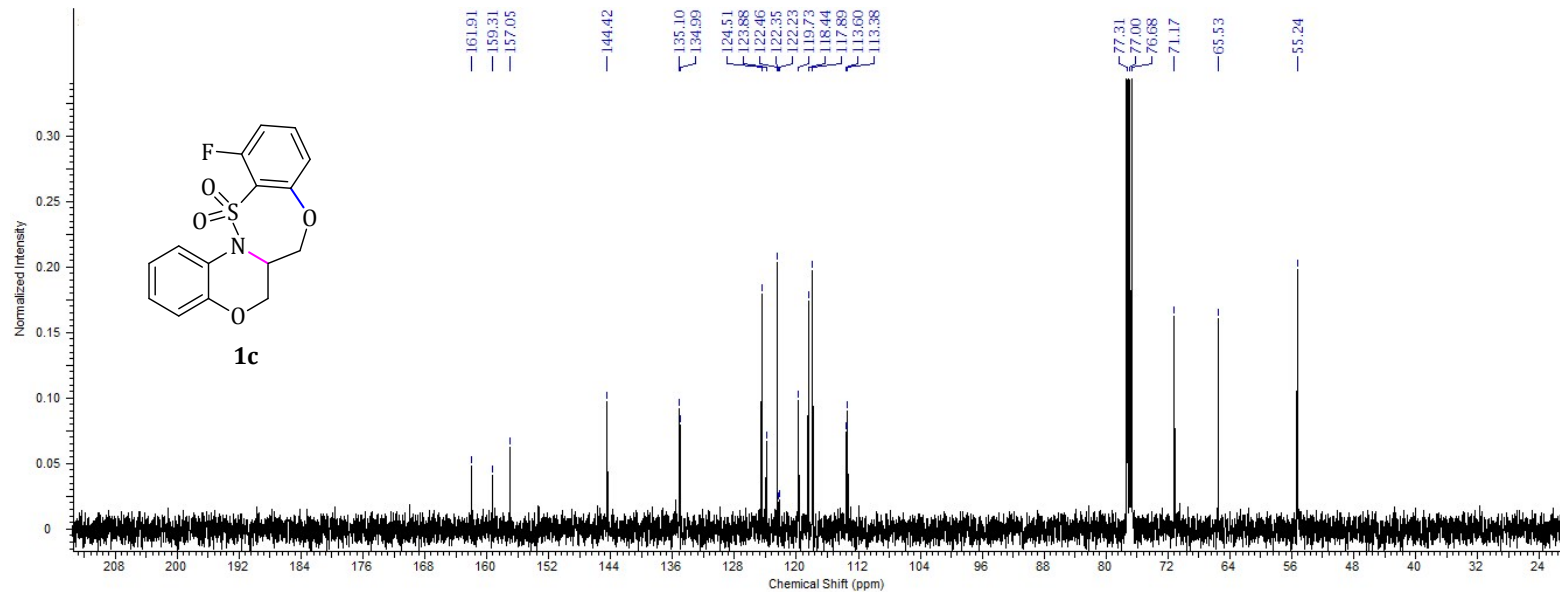

**<sup>13</sup>C NMR spectrum (100 MHz, CDCl<sub>3</sub>) of 1c**

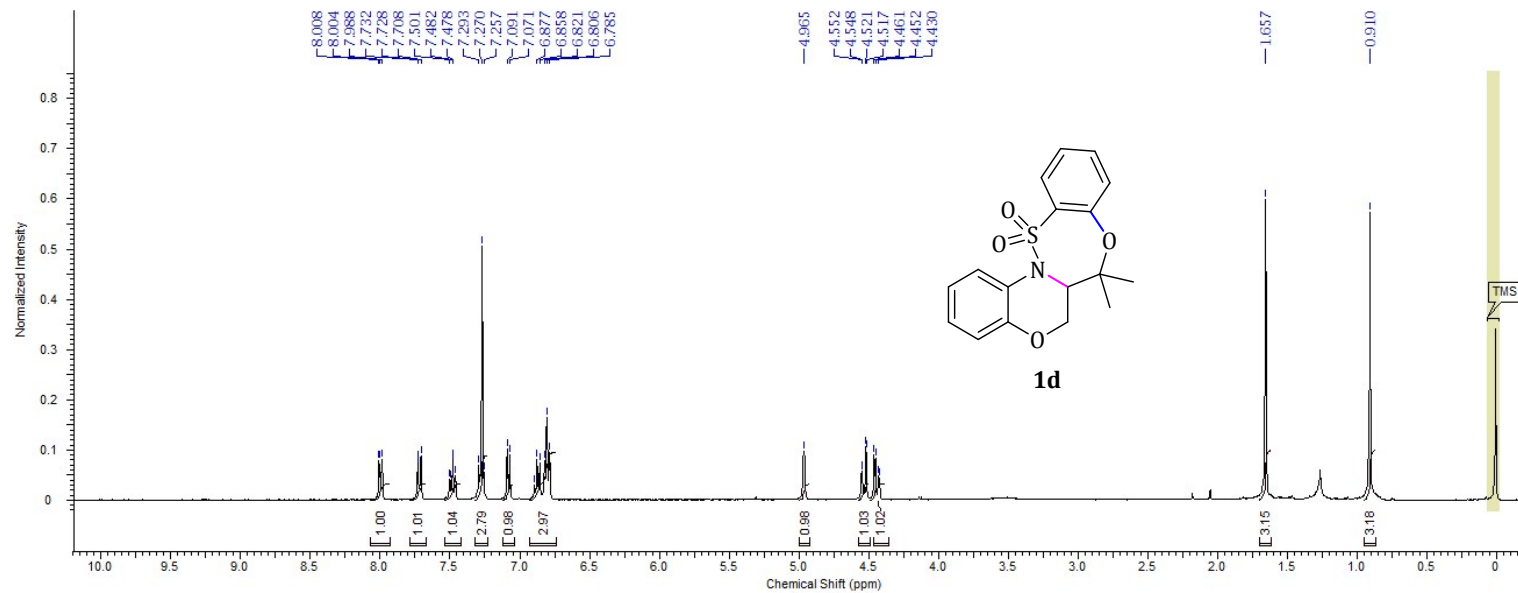

**<sup>1</sup>H NMR spectrum (400 MHz, CDCl<sub>3</sub>) of 1d**

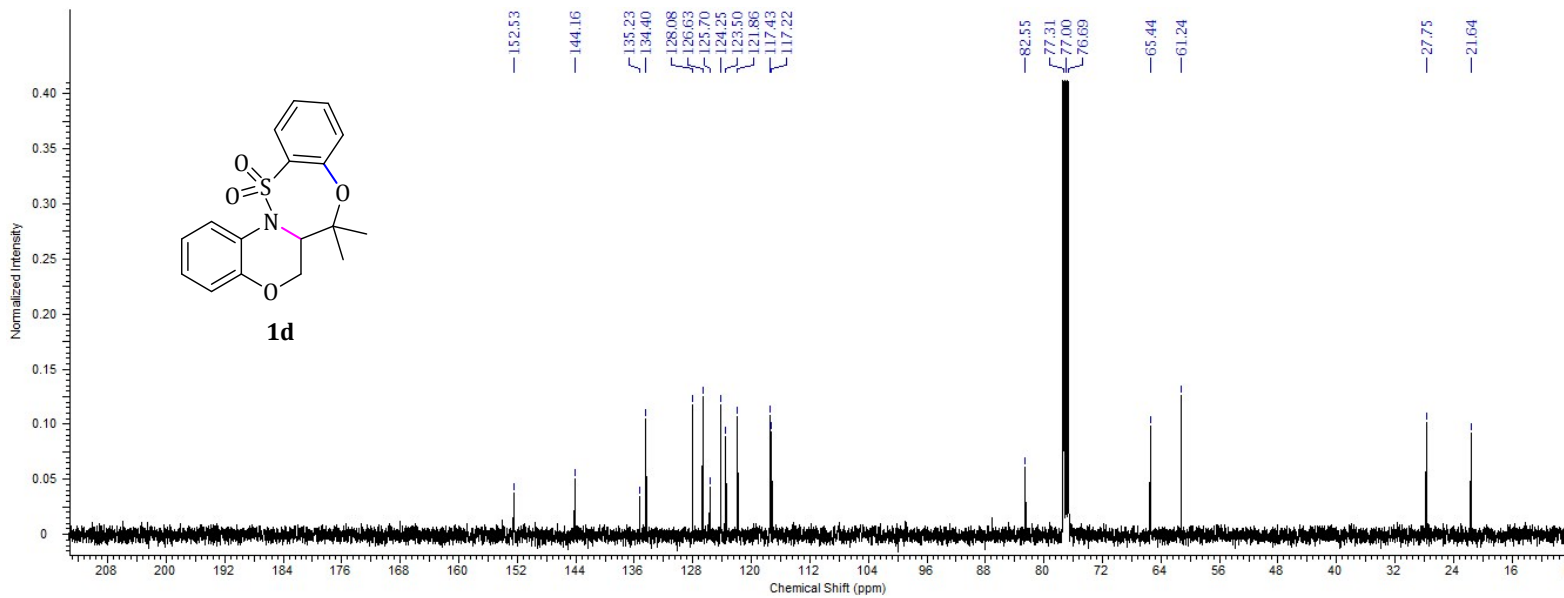

**<sup>13</sup>C NMR spectrum (100 MHz, CDCl<sub>3</sub>) of 1d**

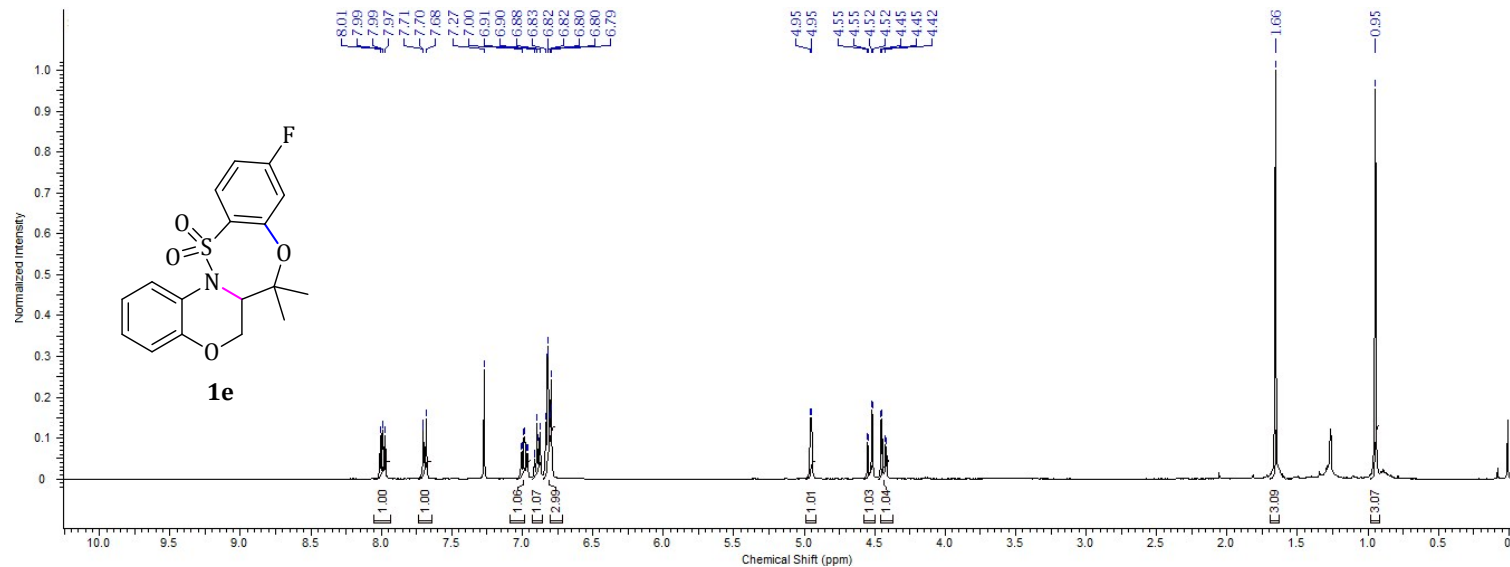

**<sup>1</sup>H NMR spectrum (400 MHz, CDCl<sub>3</sub>) of **1e****

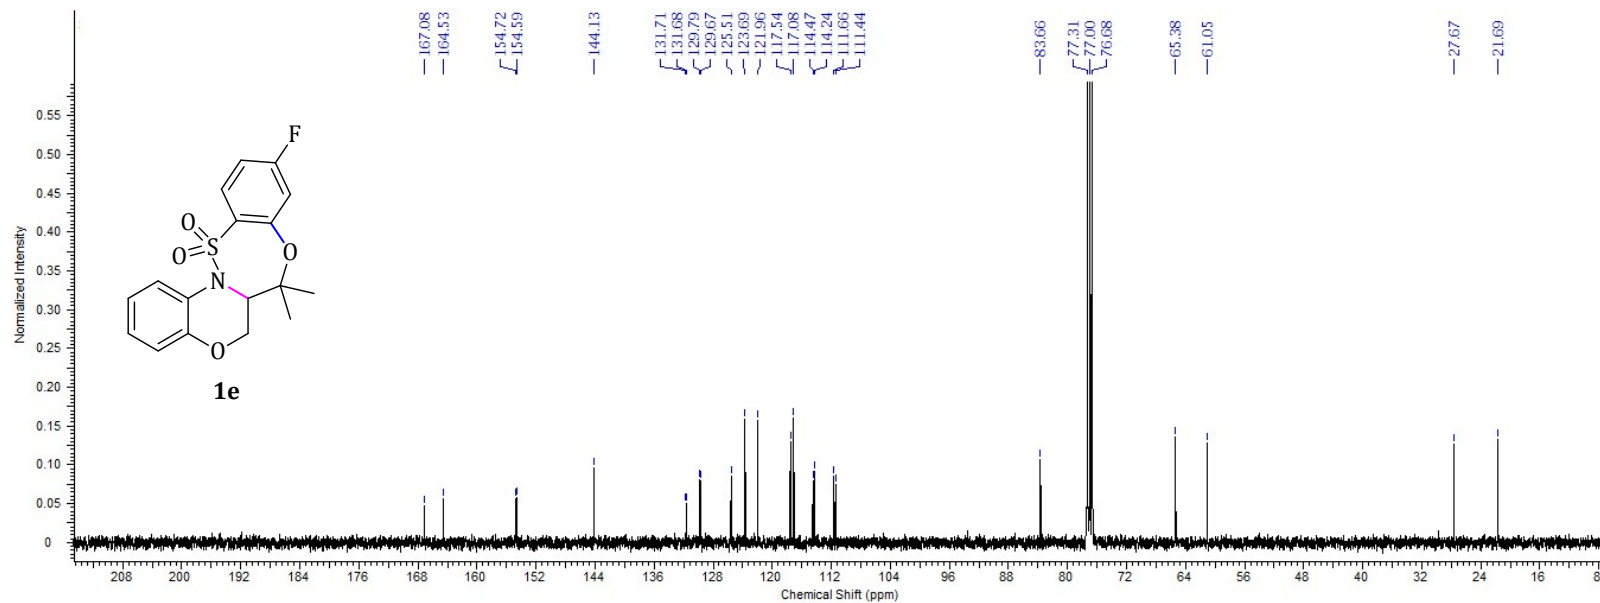

**<sup>13</sup>C NMR spectrum (100 MHz, CDCl<sub>3</sub>) of **1e****

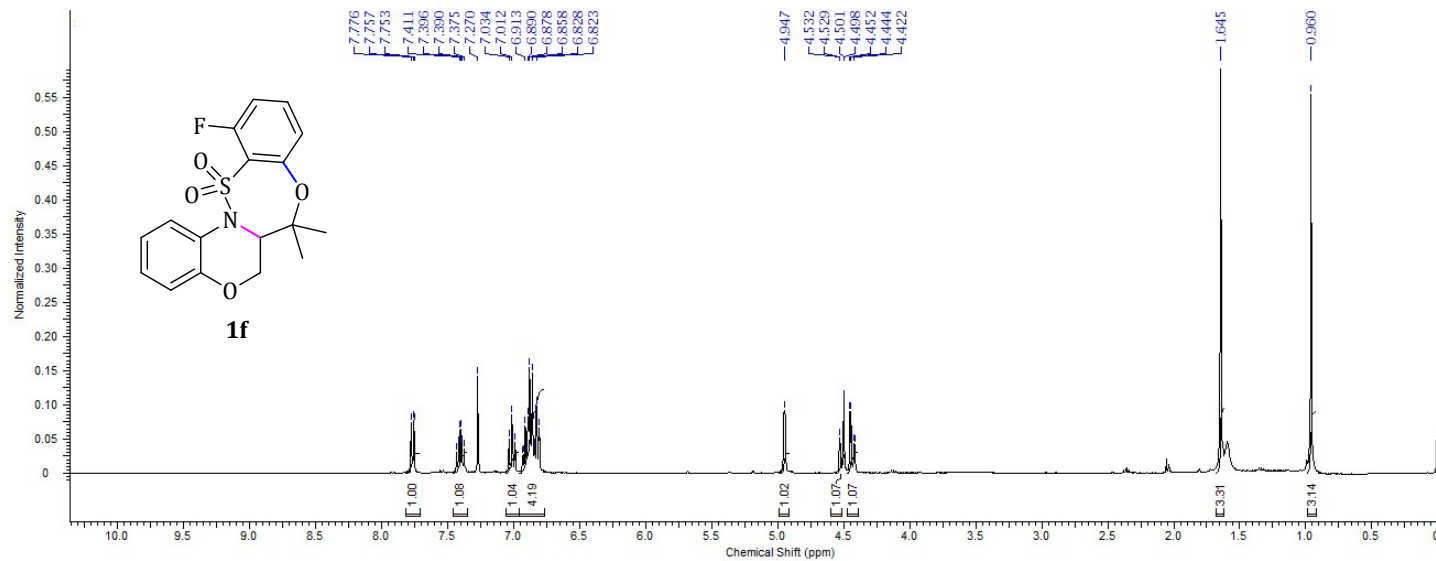

**<sup>1</sup>H NMR spectrum (400 MHz, CDCl<sub>3</sub>) of 1f**

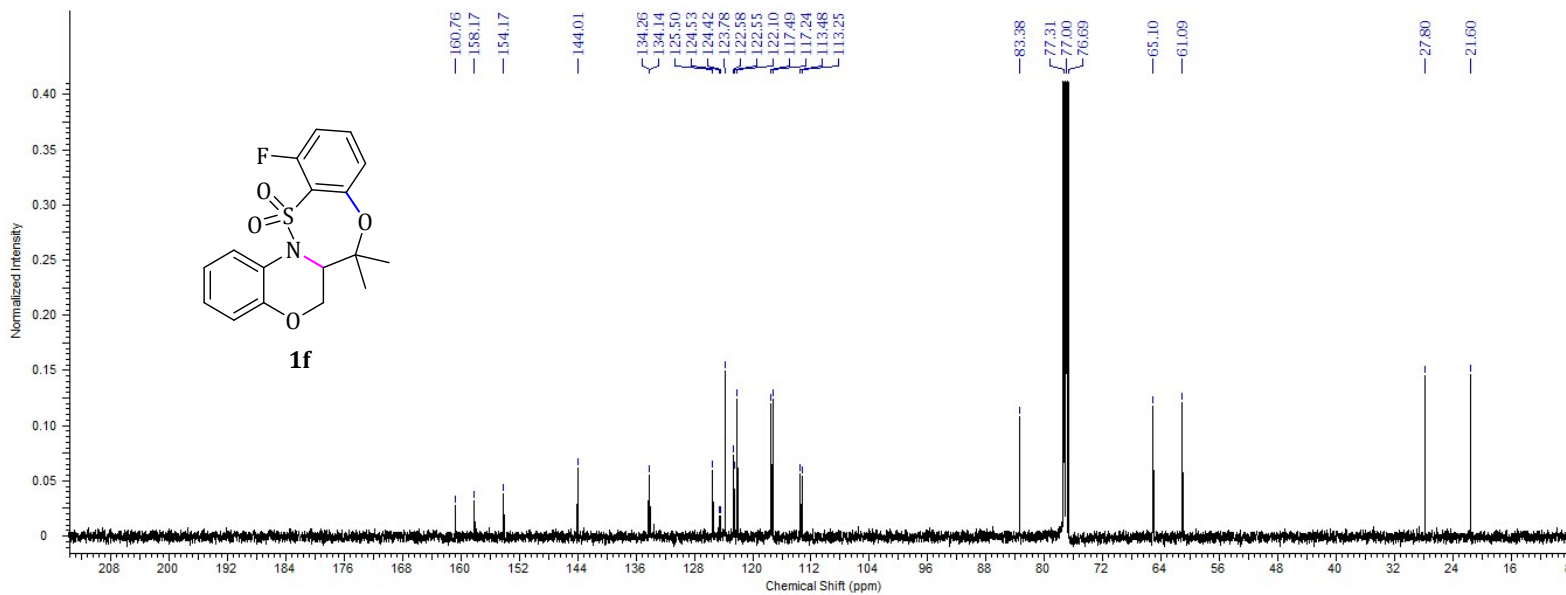

**<sup>13</sup>C NMR spectrum (100 MHz, CDCl<sub>3</sub>) of 1f**

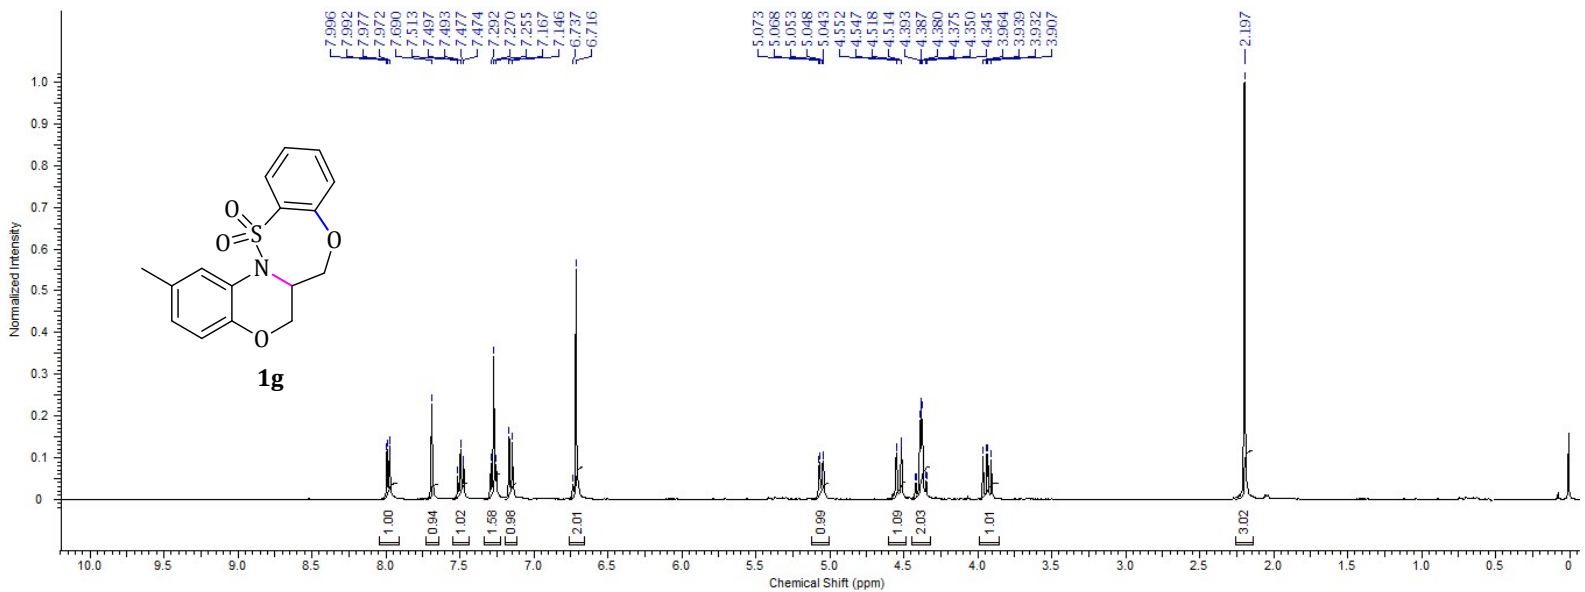

**<sup>1</sup>H NMR spectrum (400 MHz, CDCl<sub>3</sub>) of 1g**

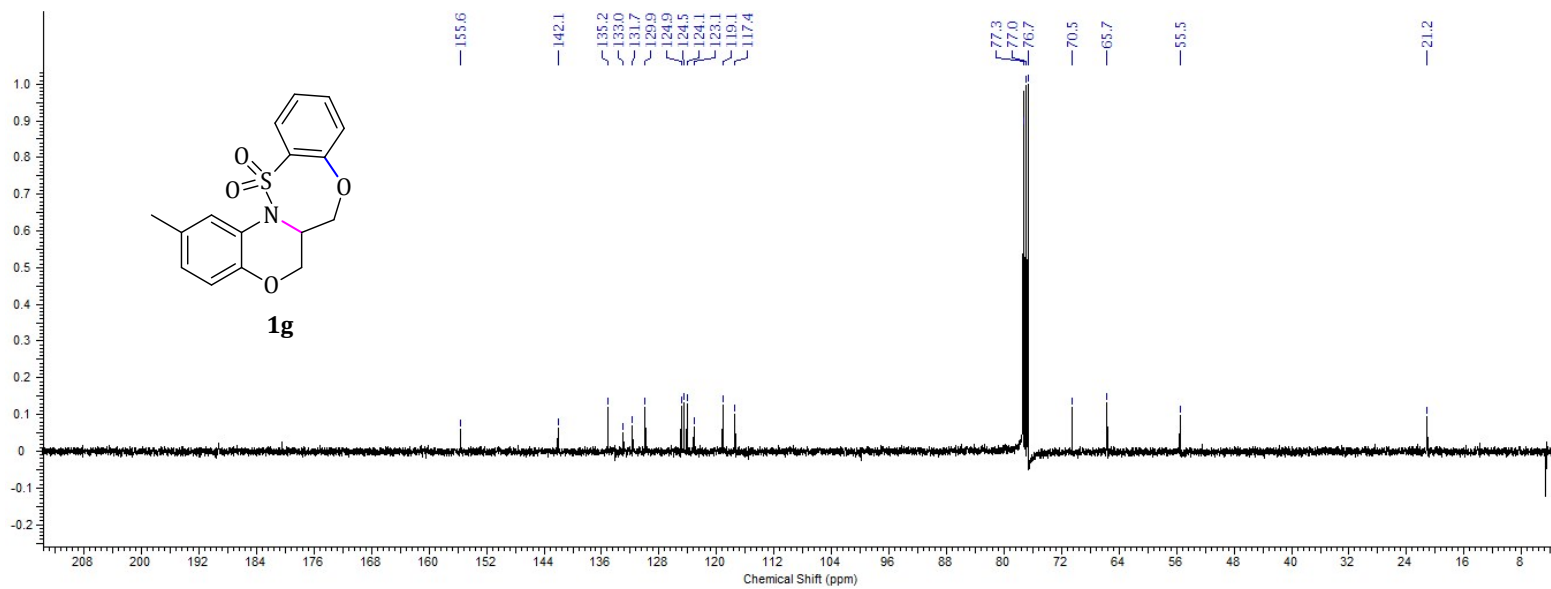

**<sup>13</sup>C NMR spectrum (100 MHz, CDCl<sub>3</sub>) of 1g**

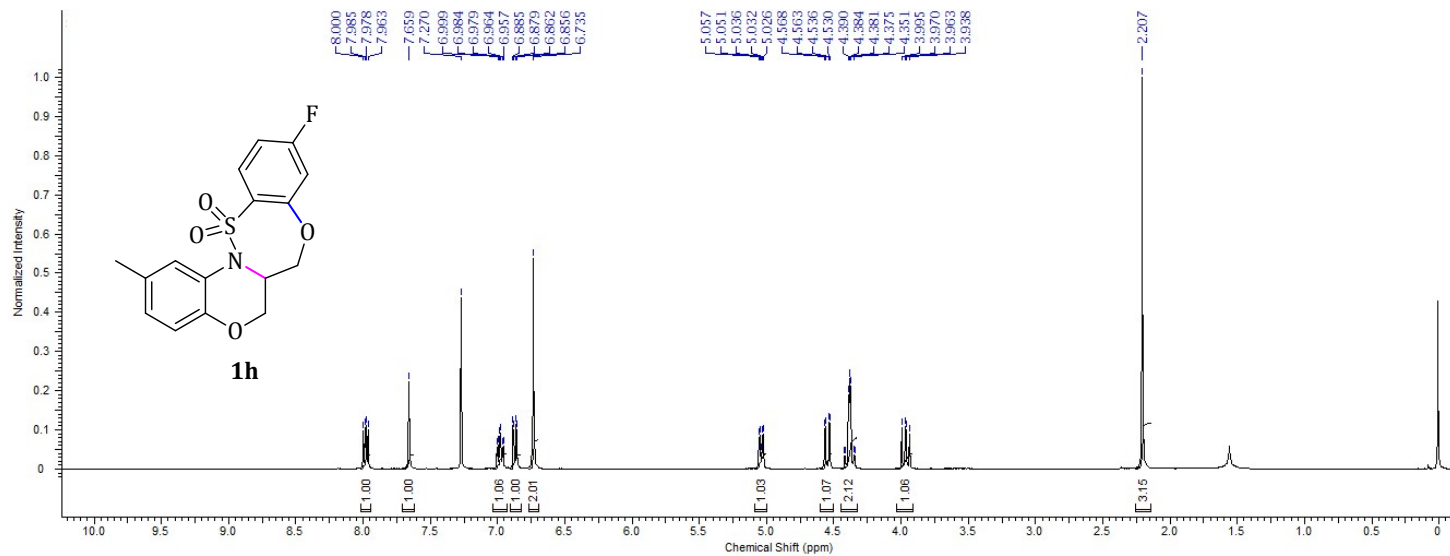

**<sup>1</sup>H NMR spectrum (400 MHz, CDCl<sub>3</sub>) of 1h**

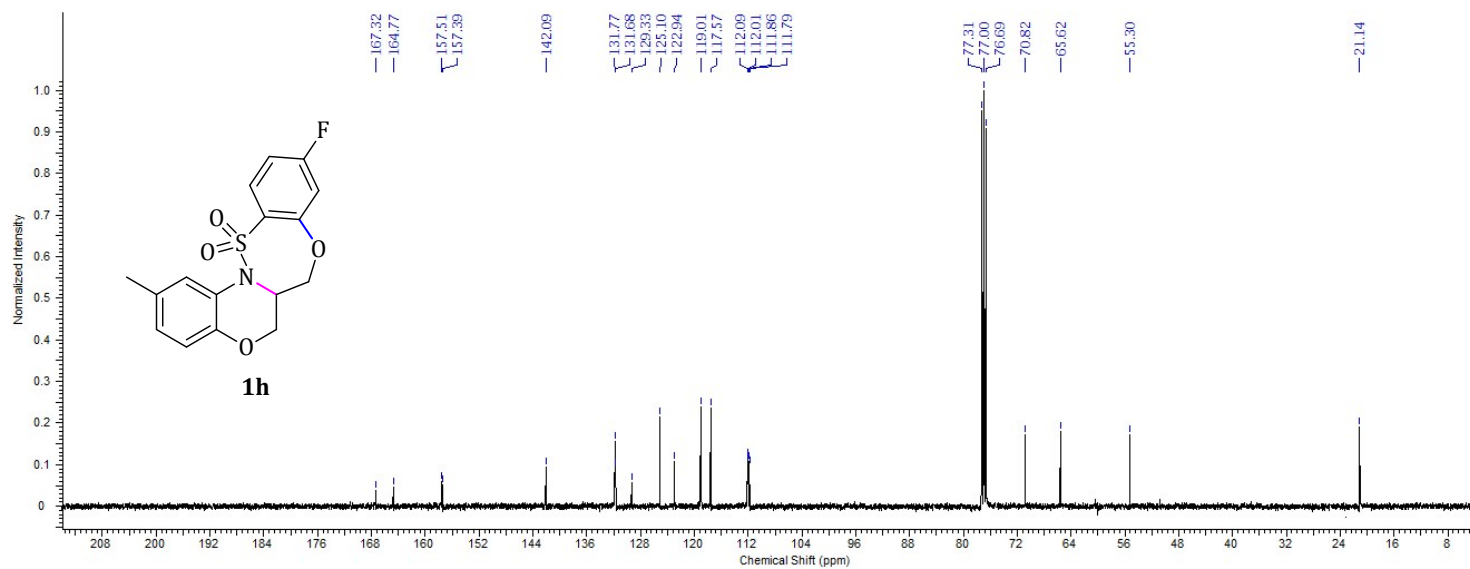

**<sup>13</sup>C NMR spectrum (100 MHz, CDCl<sub>3</sub>) of 1h**

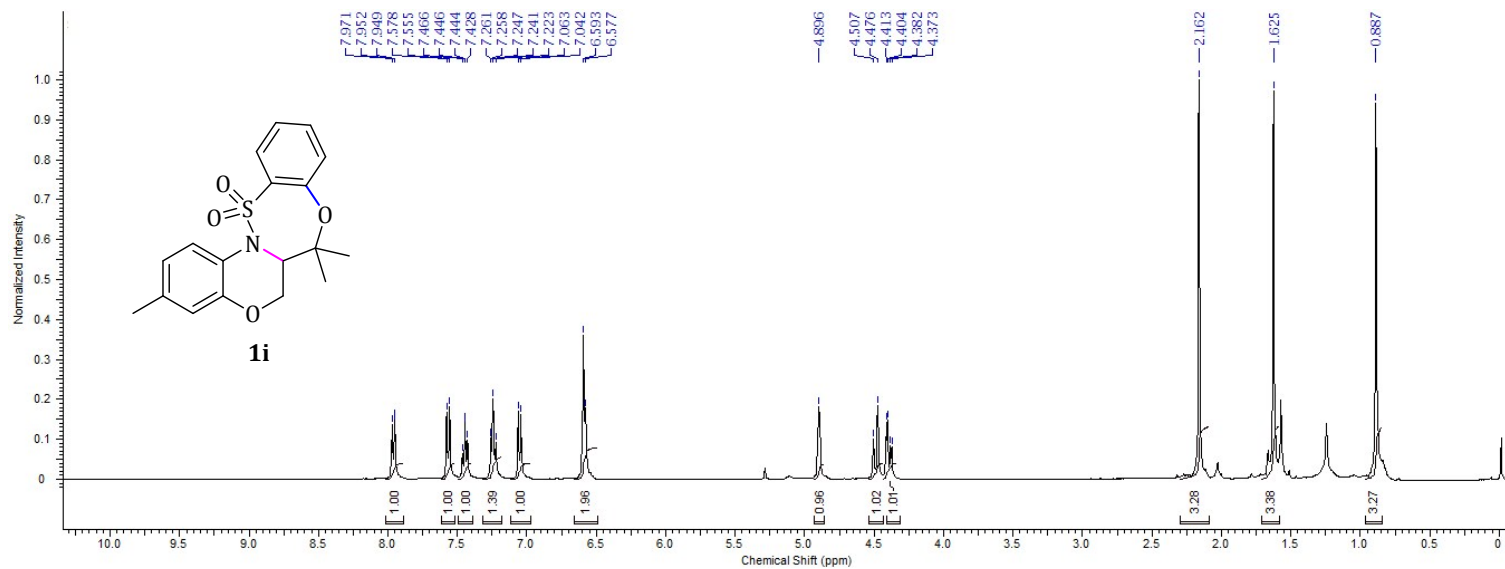

**<sup>1</sup>H NMR spectrum (400 MHz, CDCl<sub>3</sub>) of 1i**

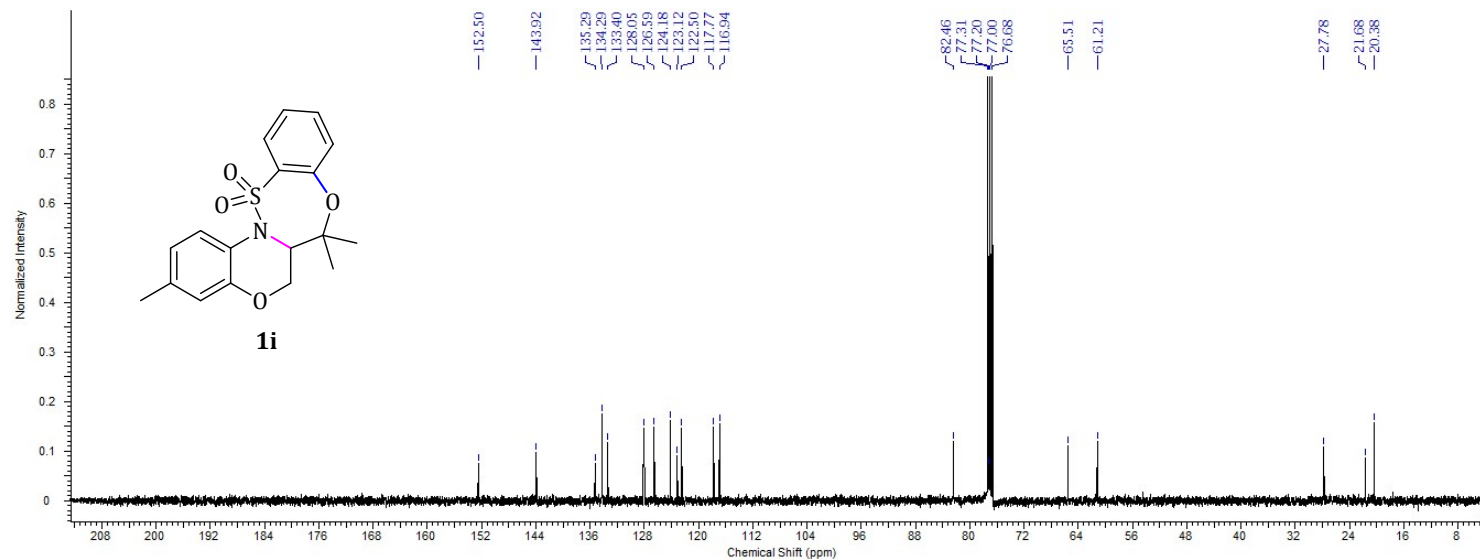

**<sup>13</sup>C NMR spectrum (100 MHz, CDCl<sub>3</sub>) of 1i**



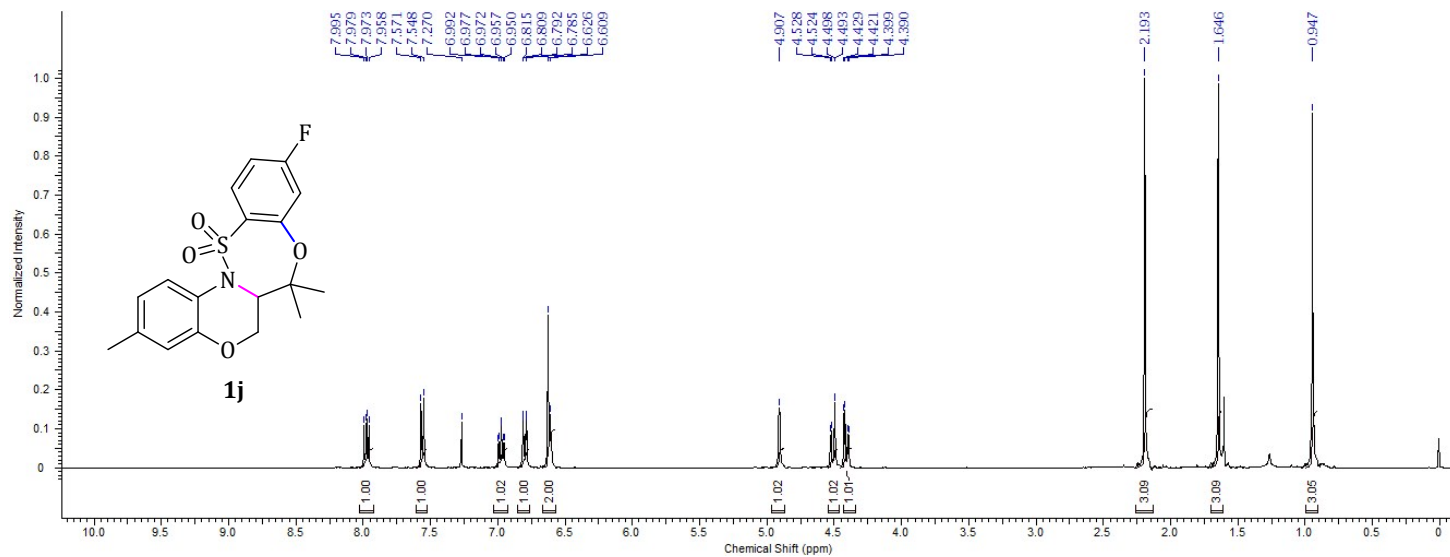

**<sup>1</sup>H NMR spectrum (400 MHz, CDCl<sub>3</sub>) of 1j**

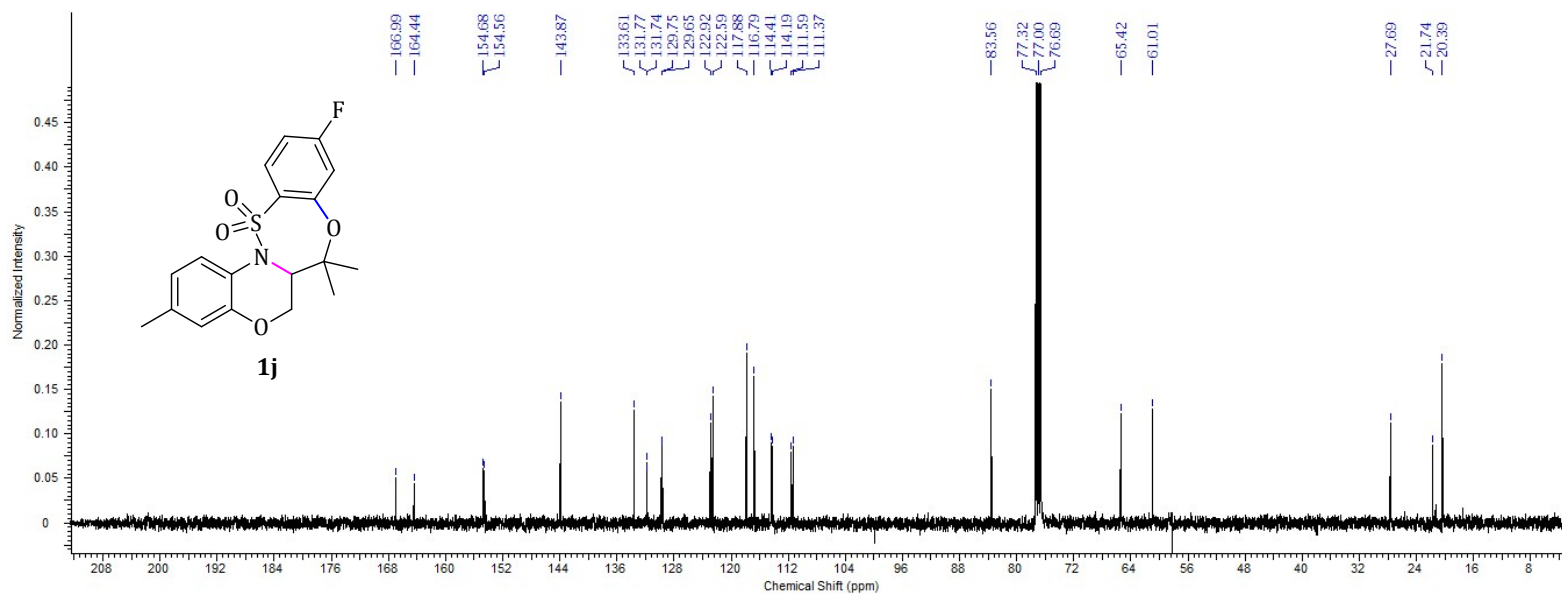

**<sup>13</sup>C NMR spectrum (100 MHz, CDCl<sub>3</sub>) of 1j**

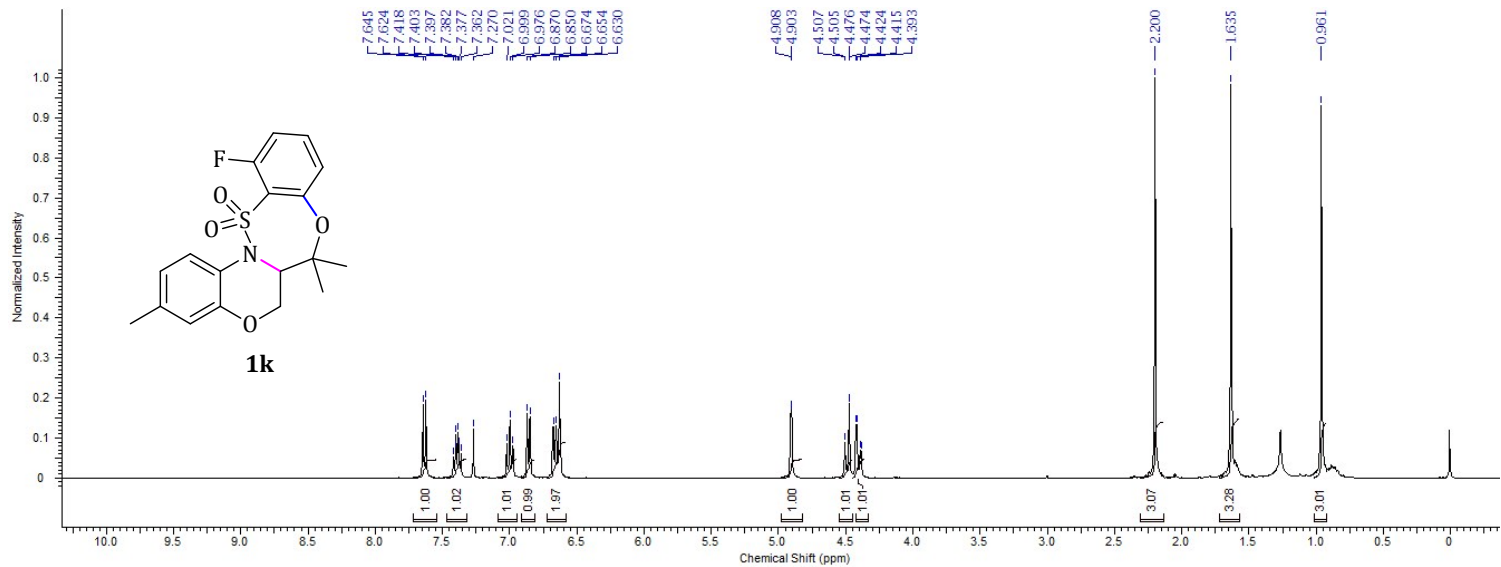

**<sup>1</sup>H NMR spectrum (400 MHz, CDCl<sub>3</sub>) of 1k**

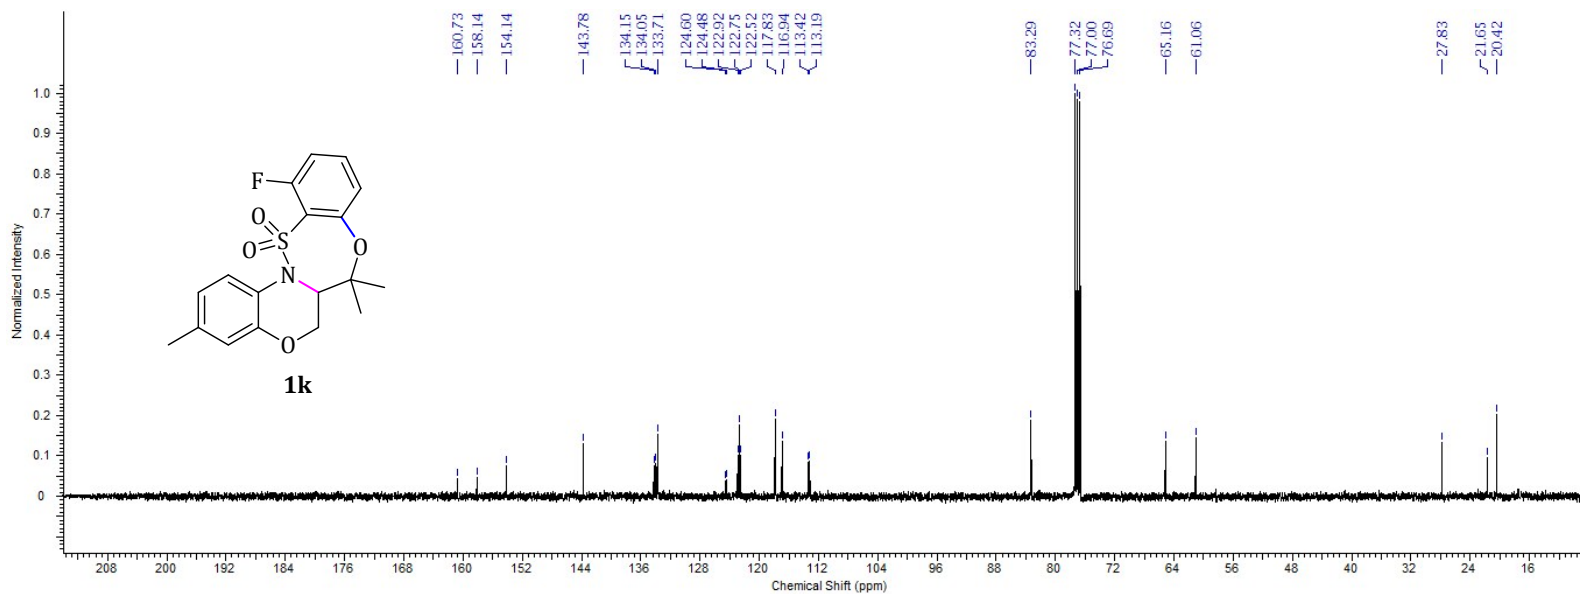

**<sup>13</sup>C NMR spectrum (100 MHz, CDCl<sub>3</sub>) of 1k**

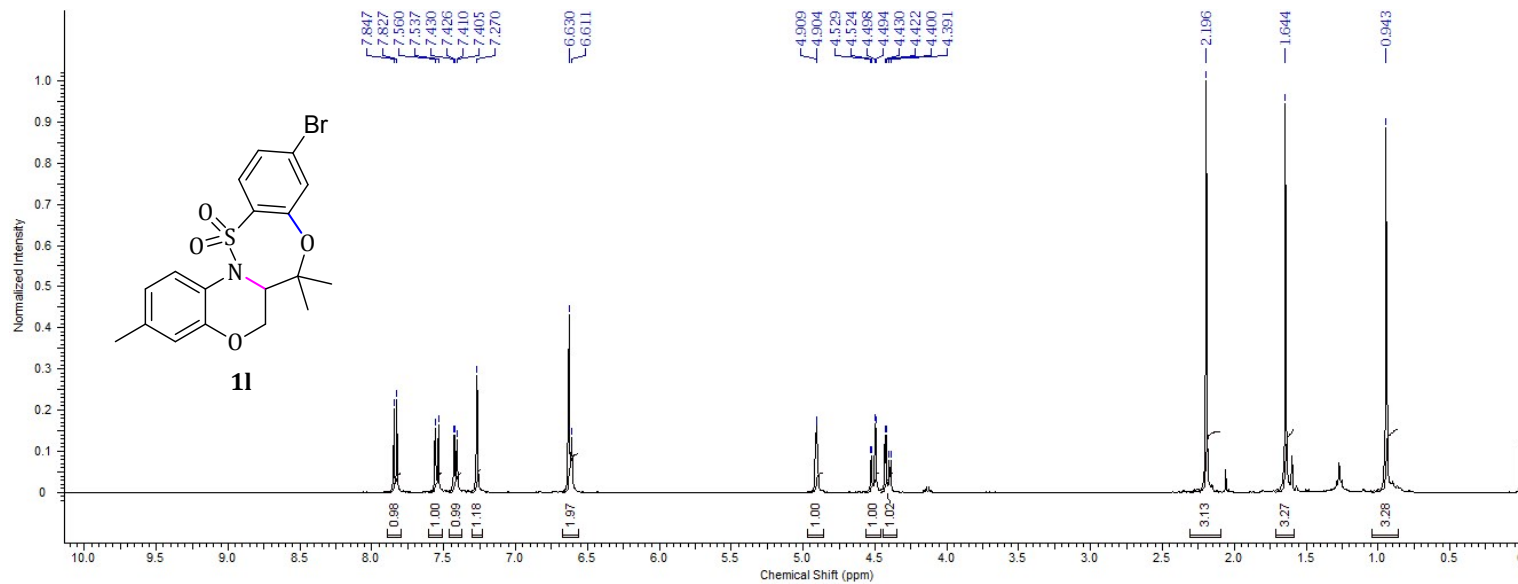

**<sup>1</sup>H NMR spectrum (400 MHz, CDCl<sub>3</sub>) of 11**

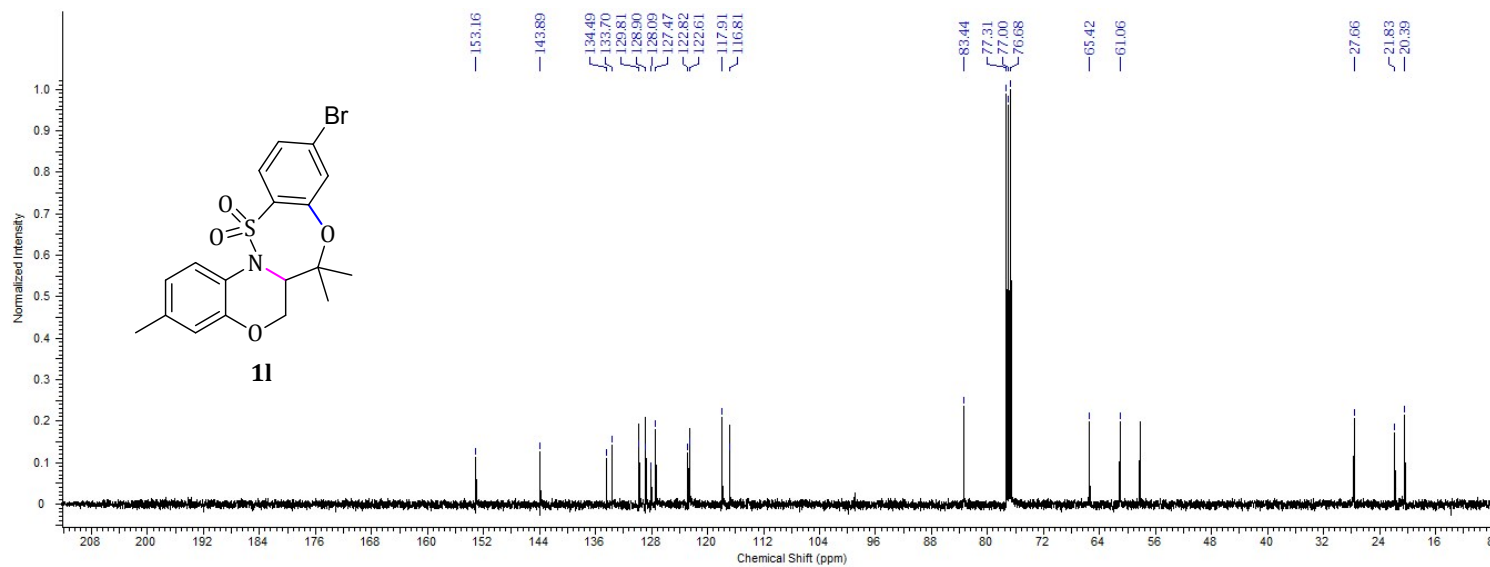

**<sup>13</sup>C NMR spectrum (100 MHz, CDCl<sub>3</sub>) of 11**

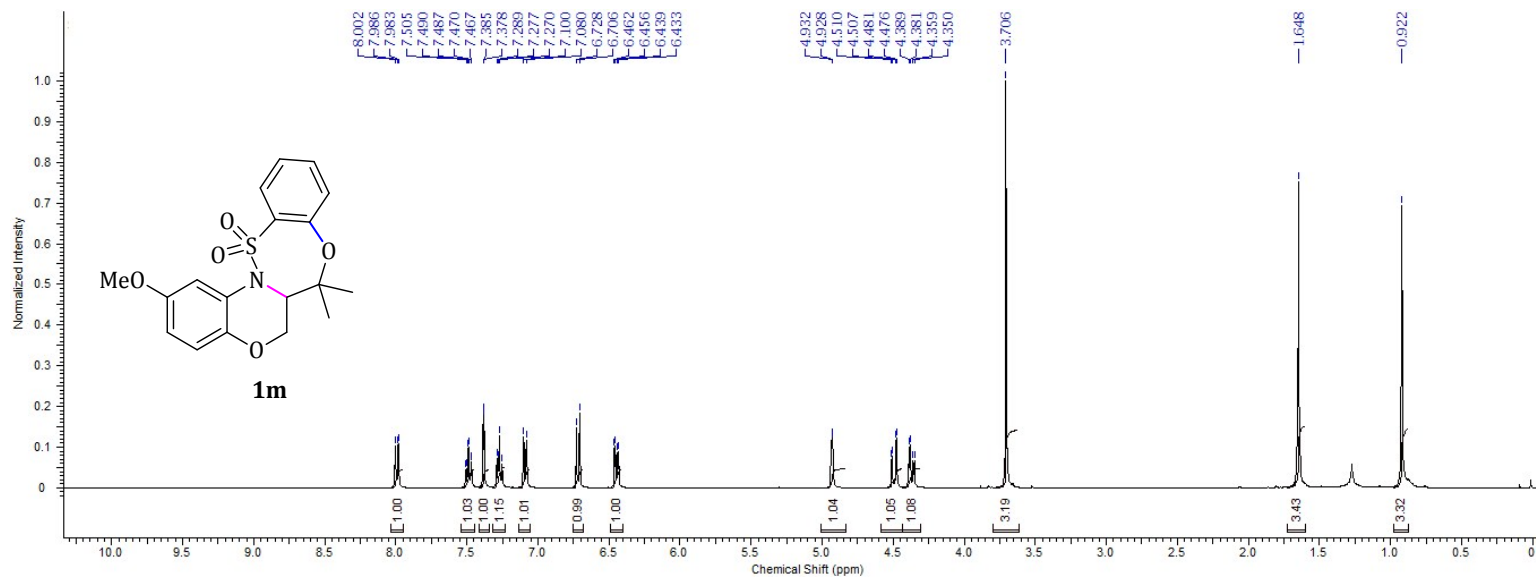

**<sup>1</sup>H NMR spectrum (400 MHz, CDCl<sub>3</sub>) of 1m**

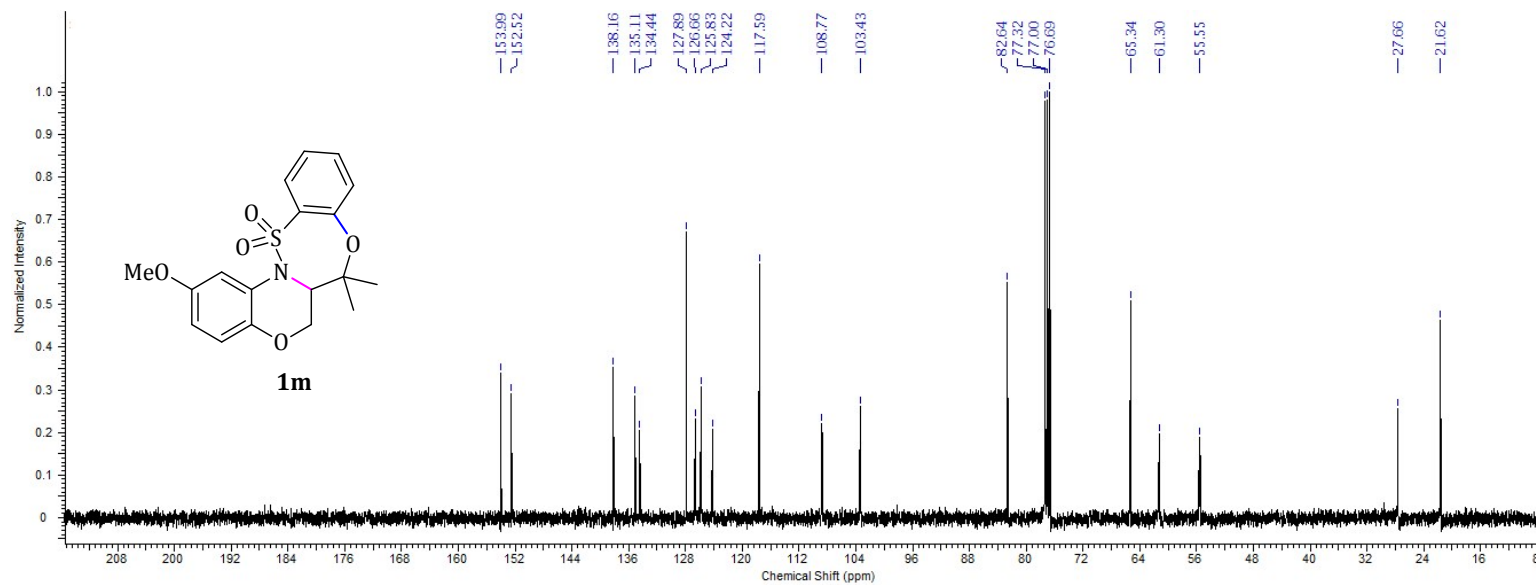

**<sup>13</sup>C NMR spectrum (100 MHz, CDCl<sub>3</sub>) of 1m**

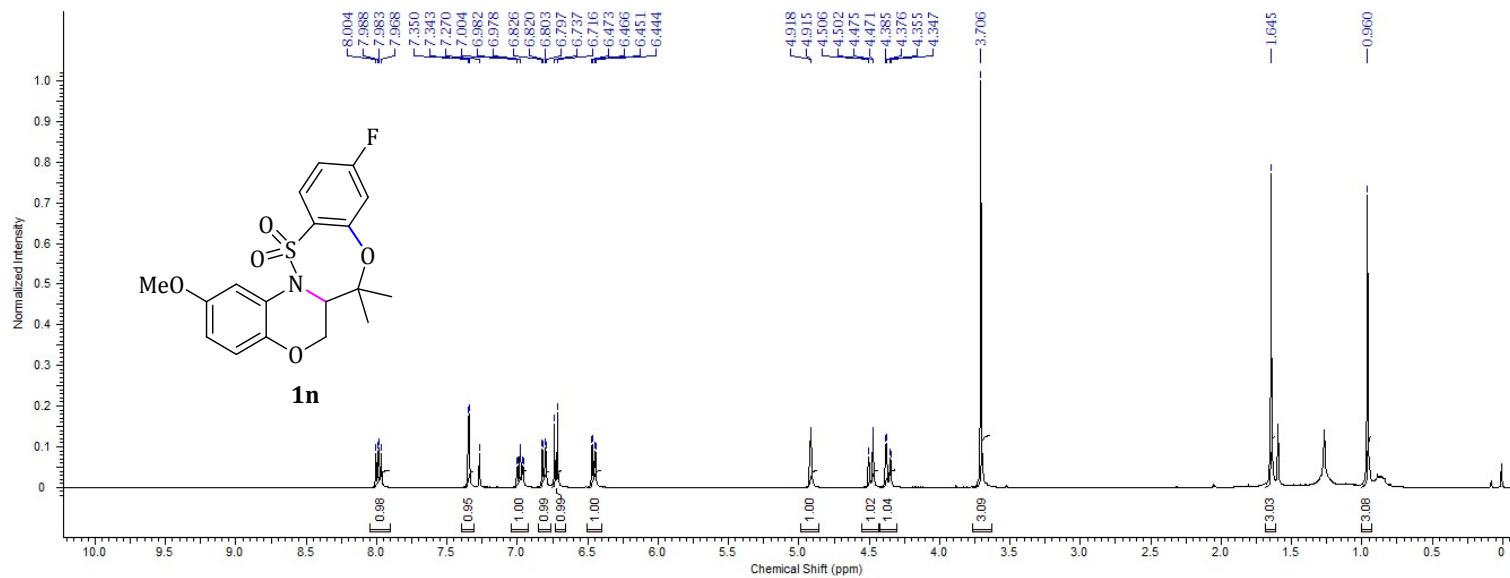

**<sup>1</sup>H NMR spectrum (400 MHz, CDCl<sub>3</sub>) of 1n**

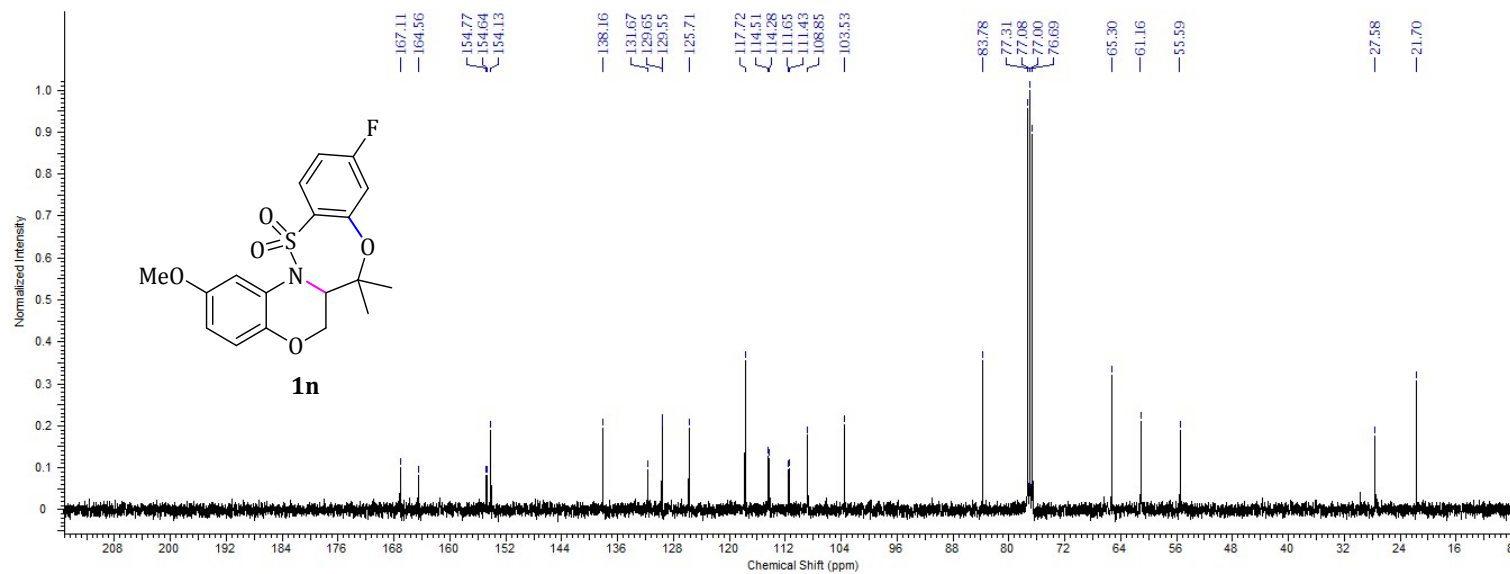

**<sup>13</sup>C NMR spectrum (100 MHz, CDCl<sub>3</sub>) of 1n**

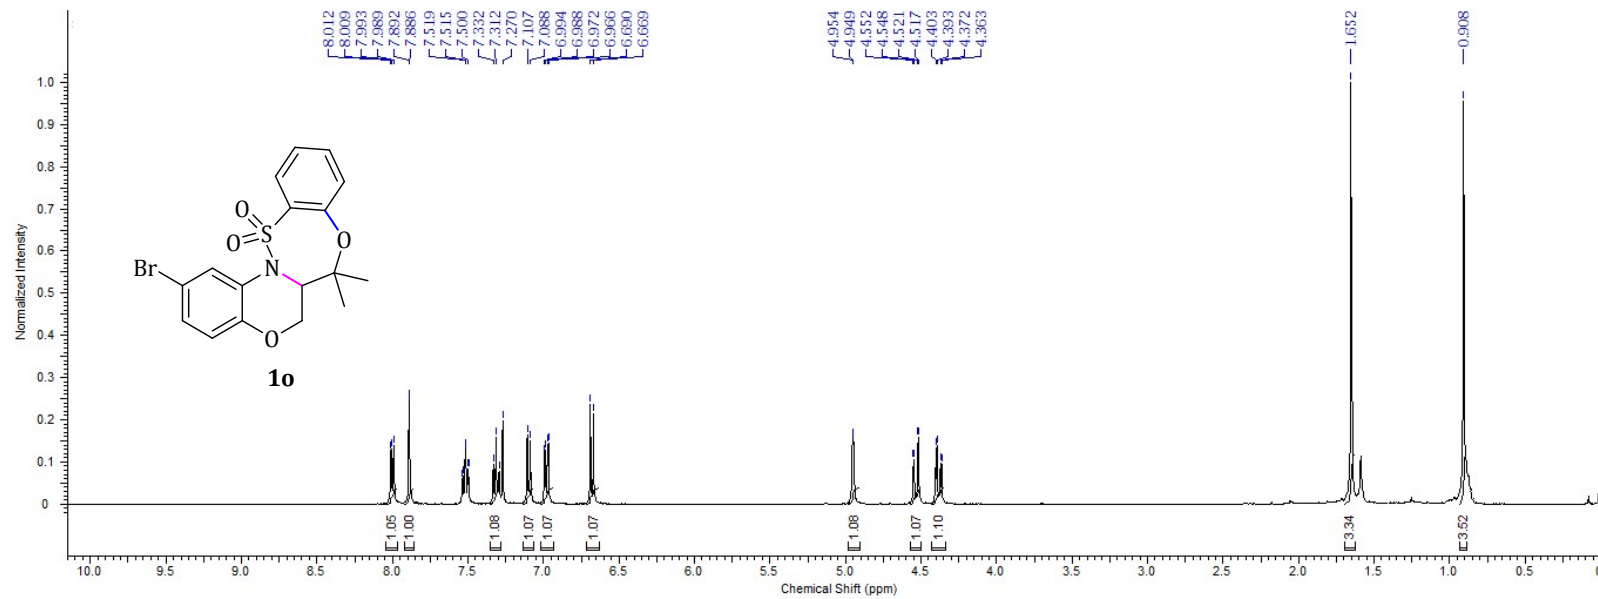

**<sup>1</sup>H NMR spectrum (400 MHz, CDCl<sub>3</sub>) of 1o**

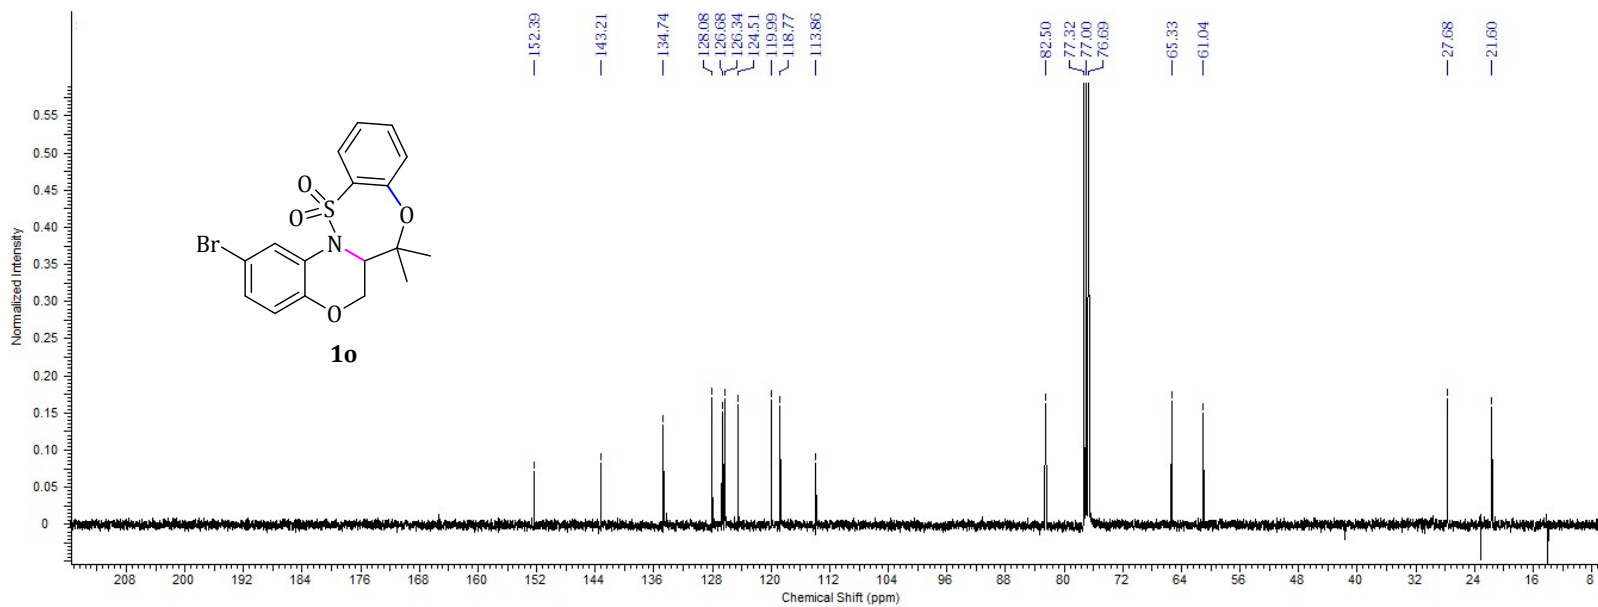

**<sup>13</sup>C NMR spectrum (100 MHz, CDCl<sub>3</sub>) of 1o**

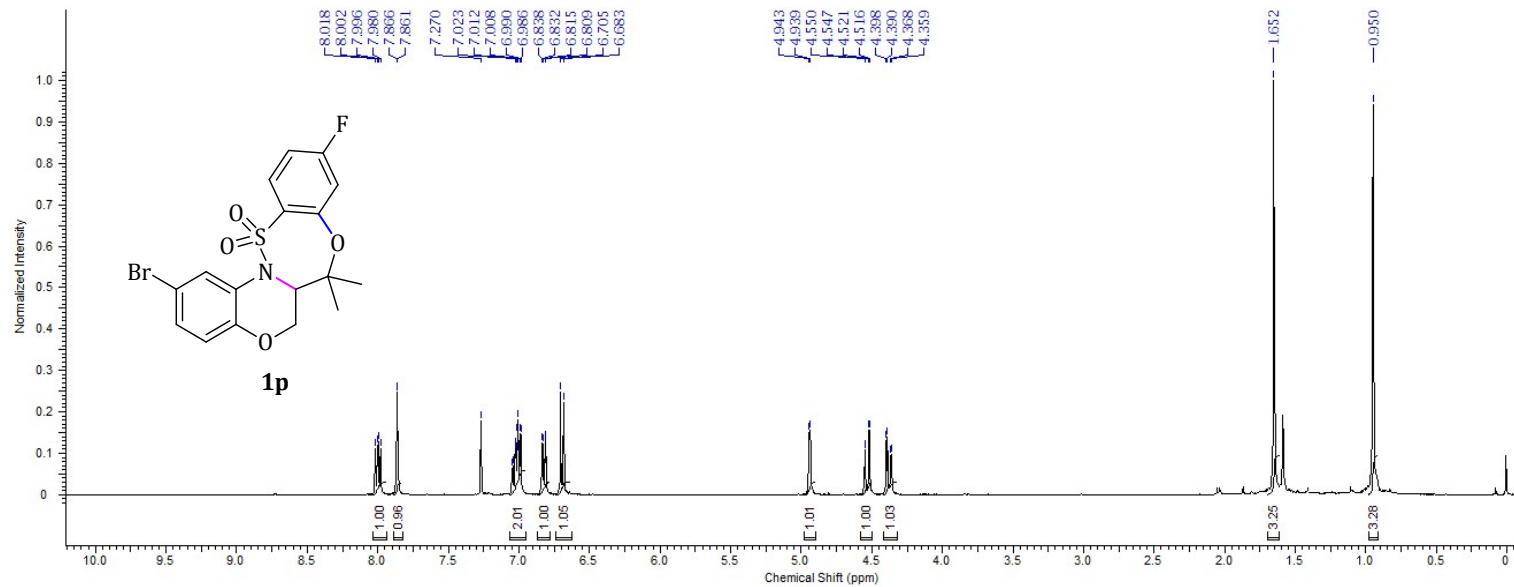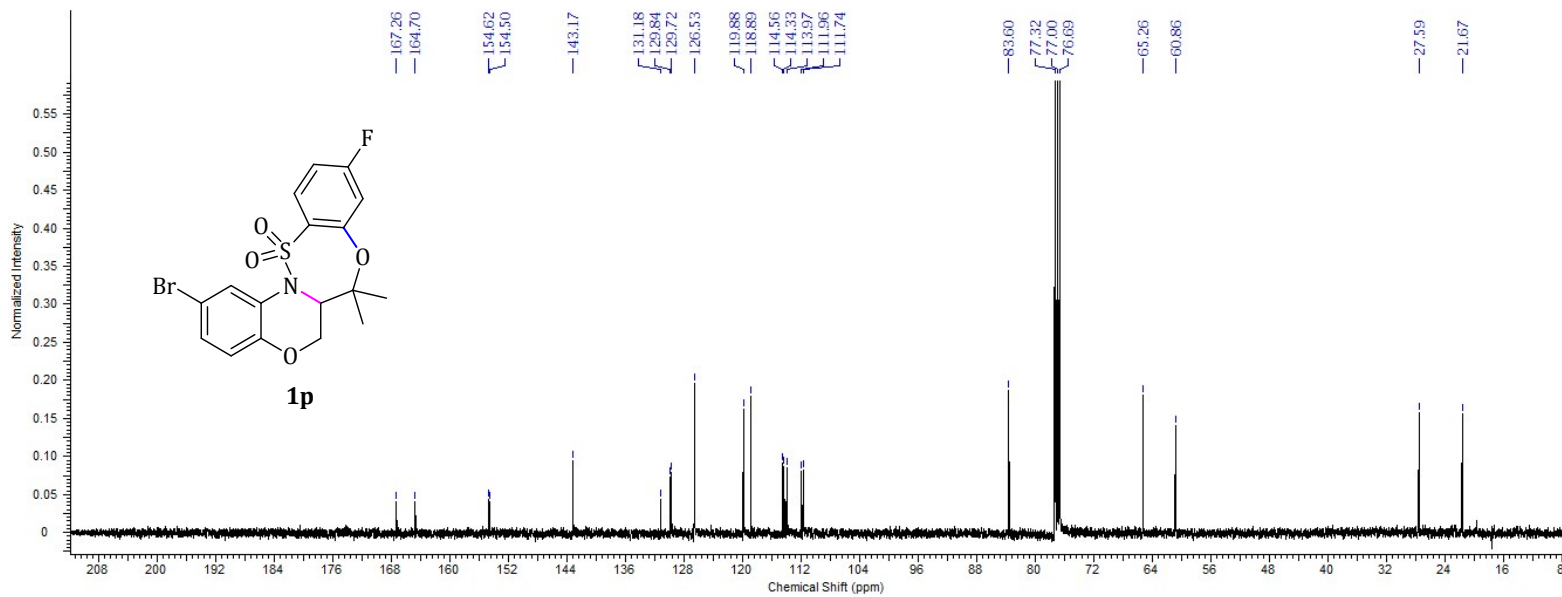

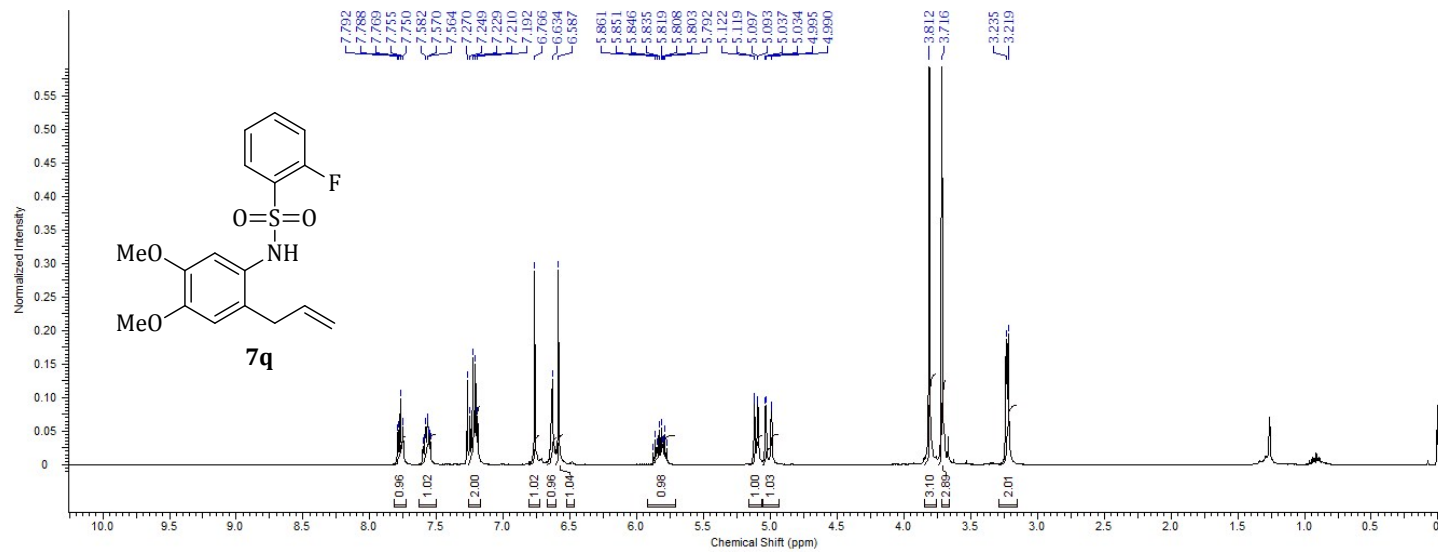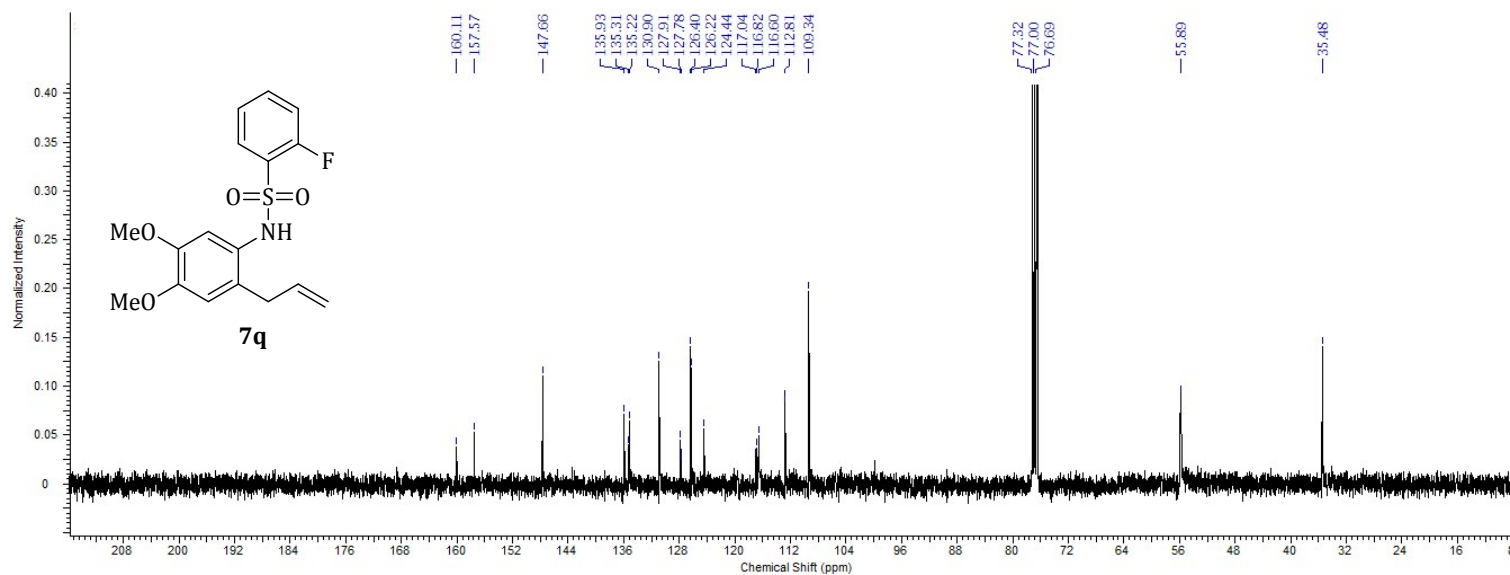



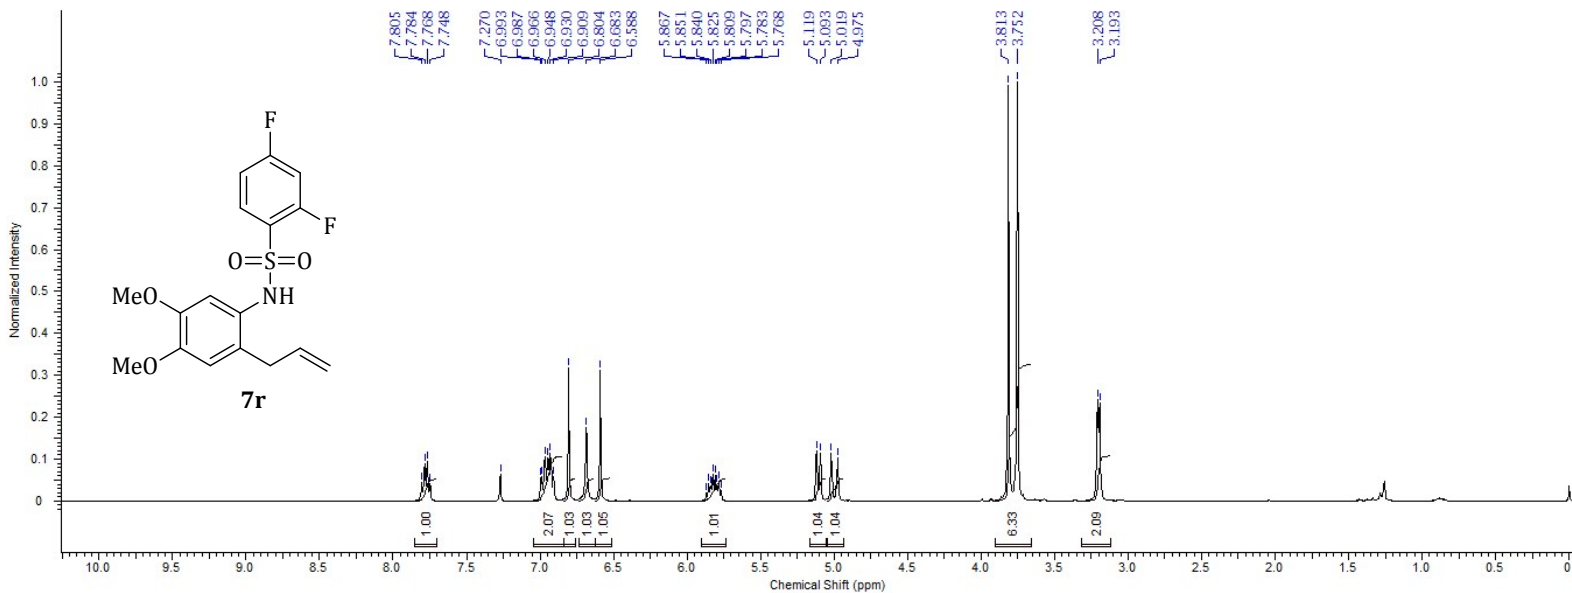

<sup>1</sup>H NMR spectrum (400 MHz, CDCl<sub>3</sub>) of **7r**

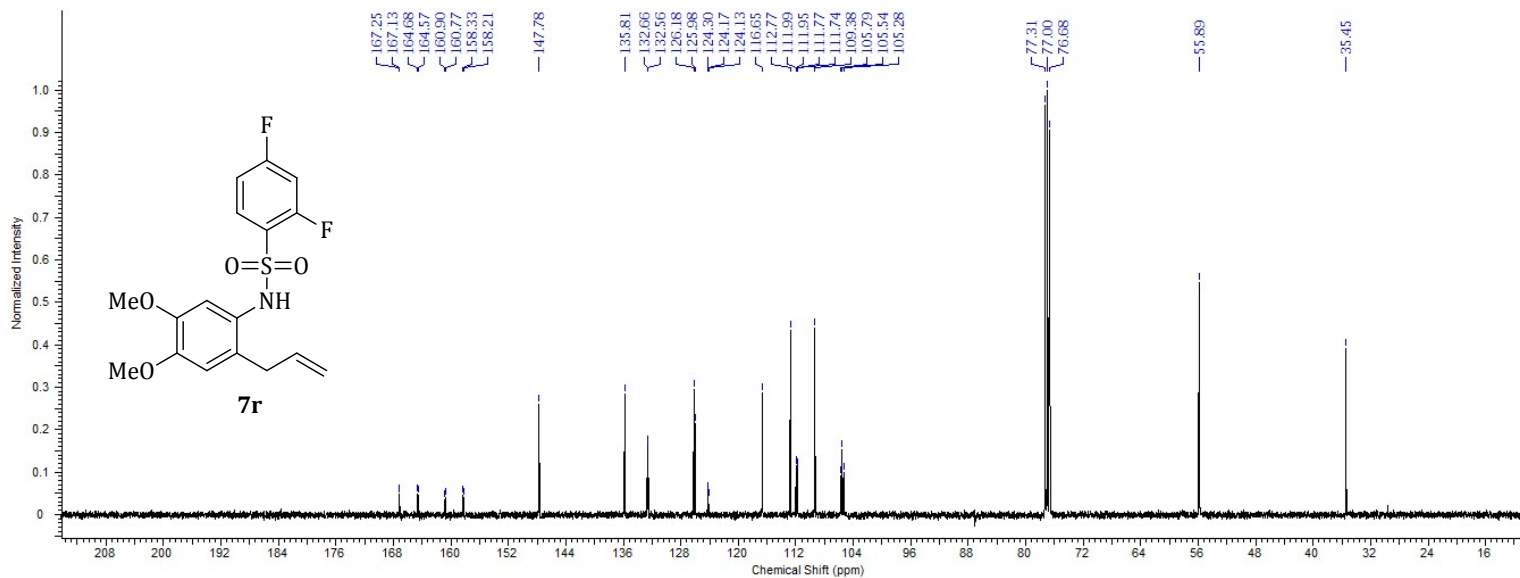

<sup>13</sup>C NMR spectrum (100 MHz, CDCl<sub>3</sub>) of **7r**

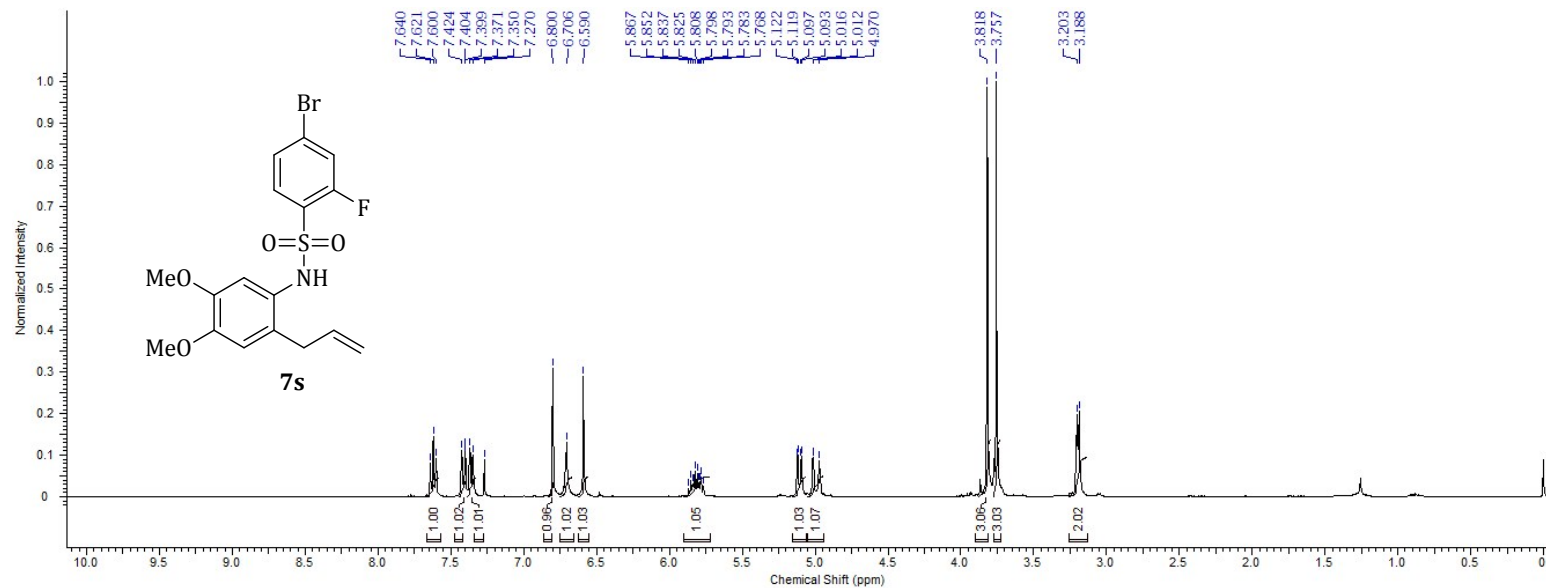

**<sup>1</sup>H NMR spectrum (400 MHz, CDCl<sub>3</sub>) of 7s**

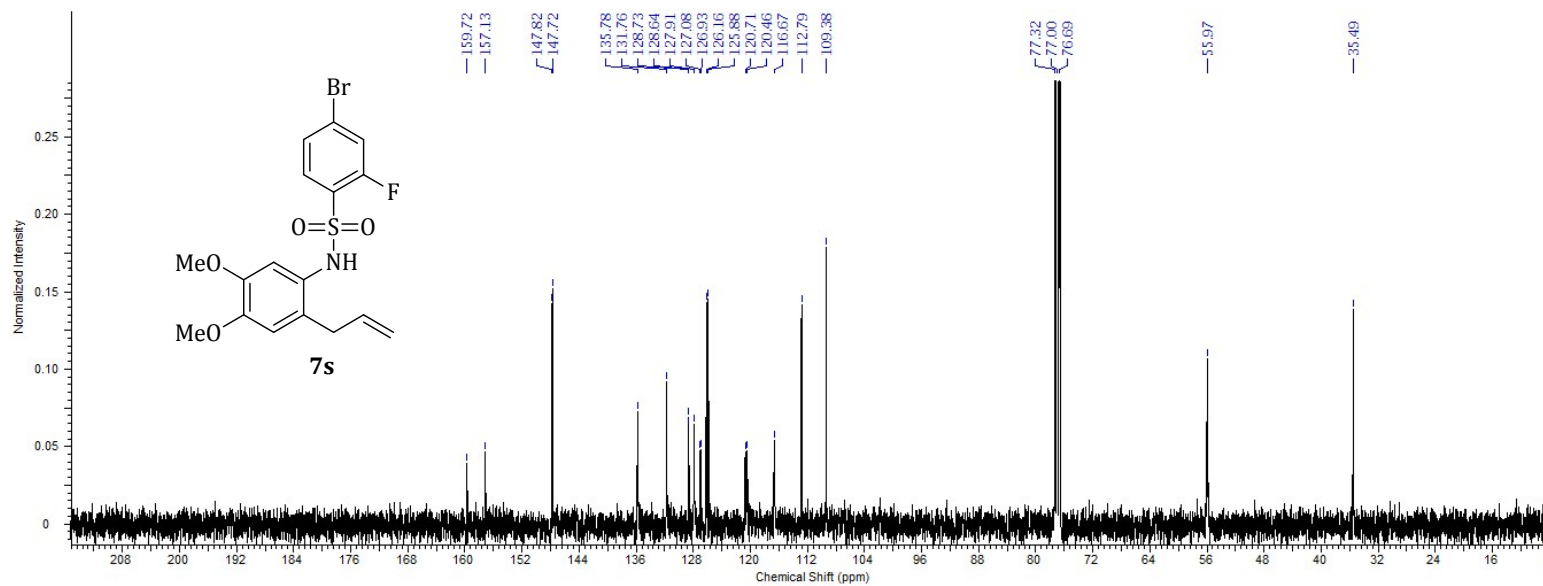

**<sup>13</sup>C NMR spectrum (100 MHz, CDCl<sub>3</sub>) of 7s**

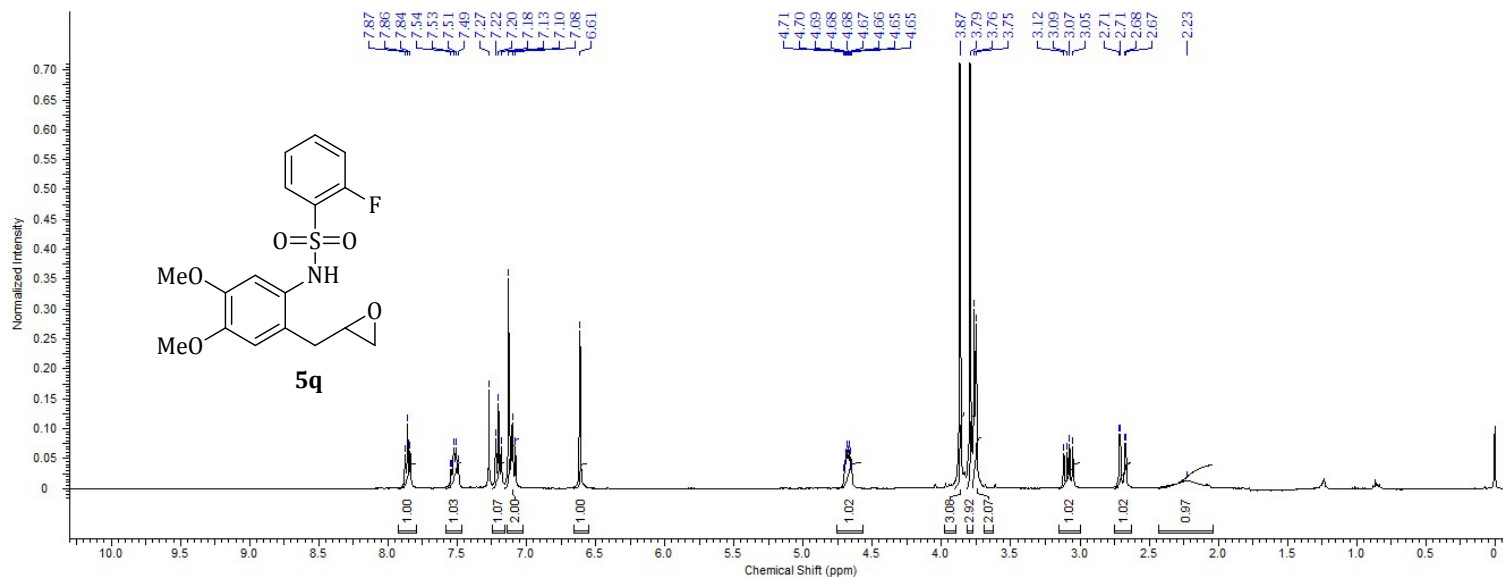

**<sup>1</sup>H NMR spectrum (400 MHz, CDCl<sub>3</sub>) of 5q**

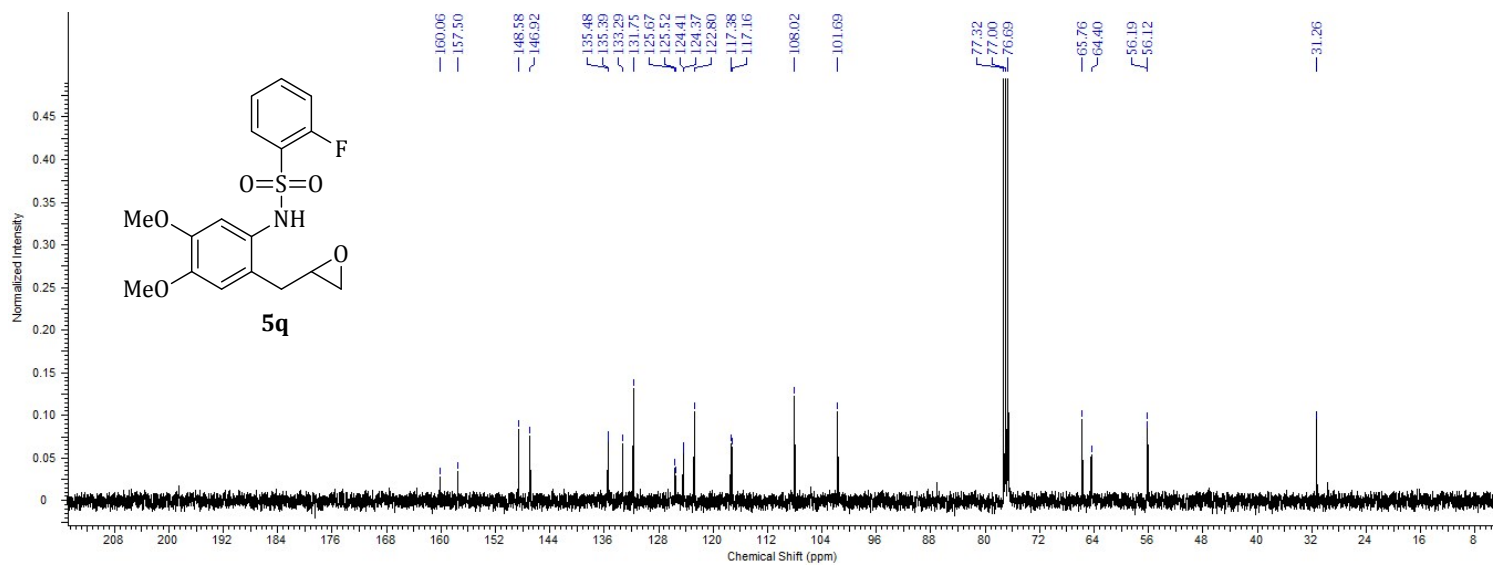

**<sup>13</sup>C NMR spectrum (100 MHz, CDCl<sub>3</sub>) of 5q**

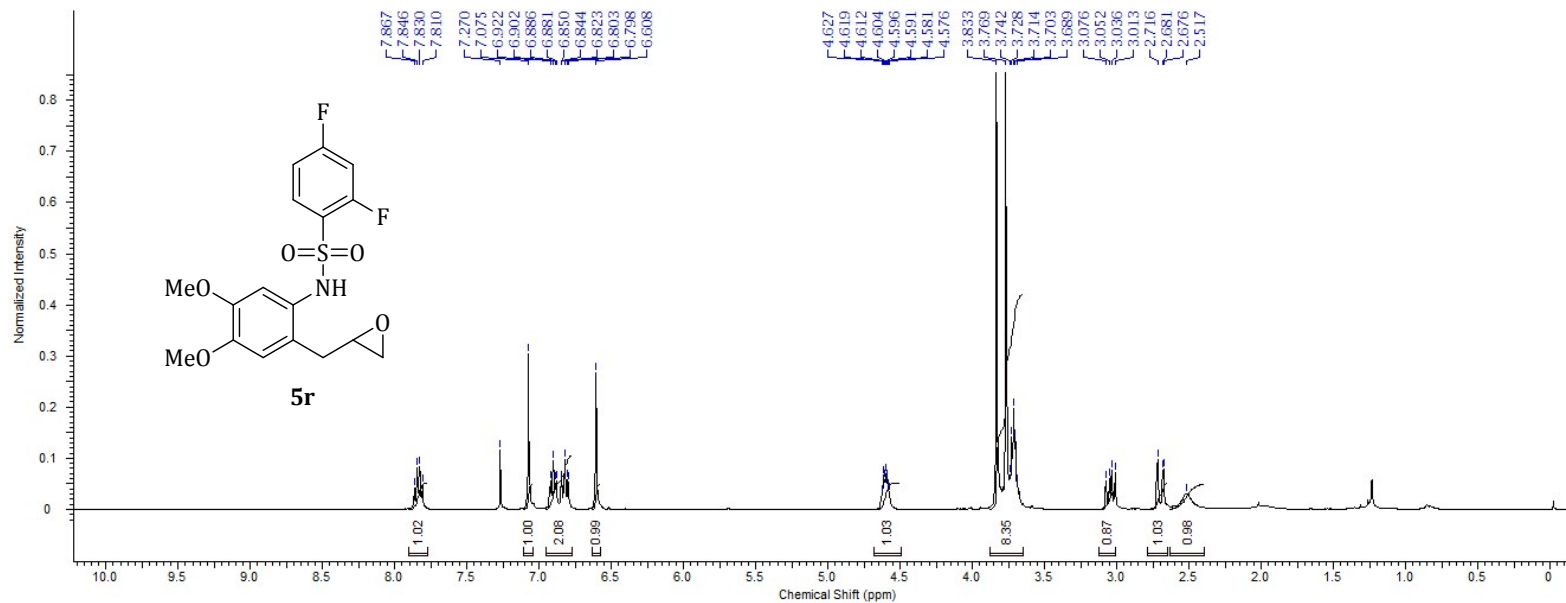

**<sup>1</sup>H NMR spectrum (400 MHz, CDCl<sub>3</sub>) of 5r**

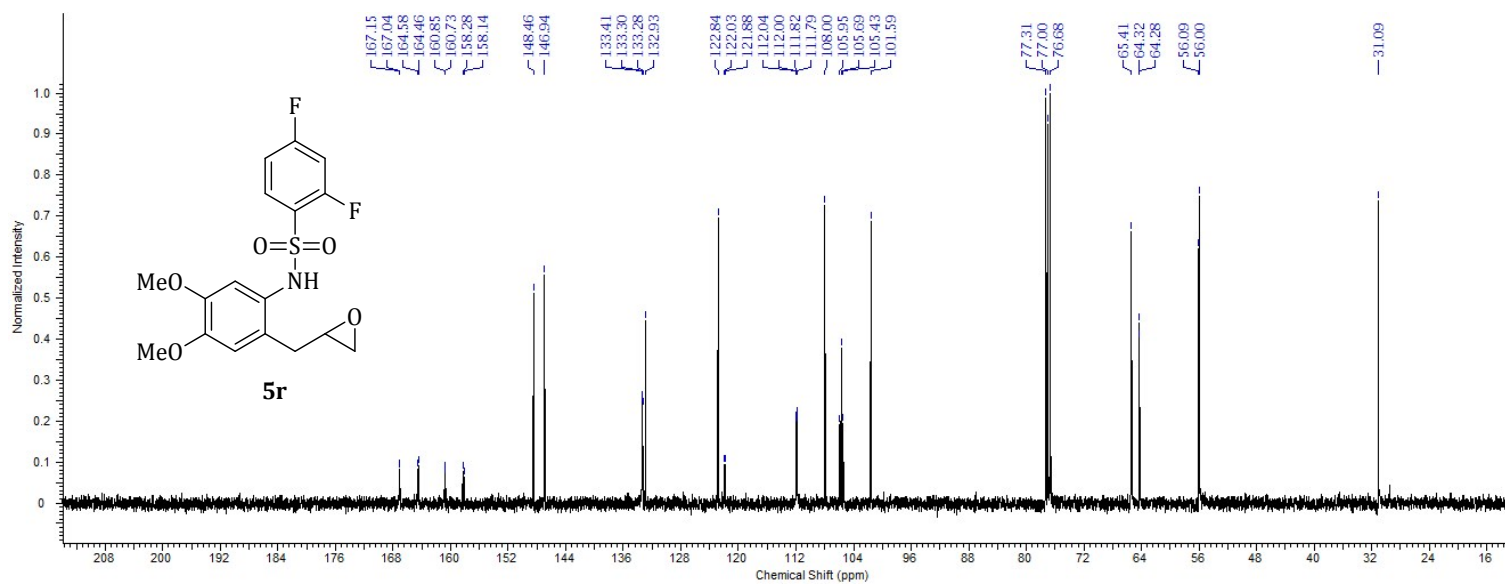

**<sup>13</sup>C NMR spectrum (100 MHz, CDCl<sub>3</sub>) of 5r**

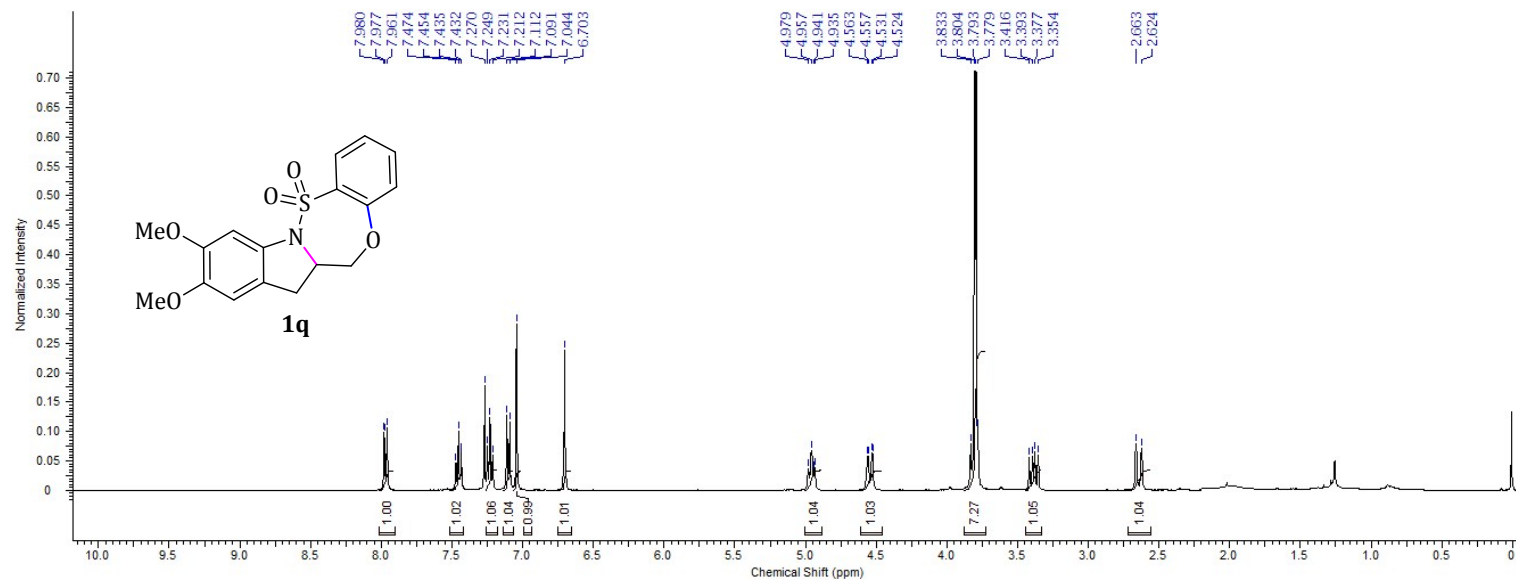

**<sup>1</sup>H NMR spectrum (400 MHz, CDCl<sub>3</sub>) of 1q**

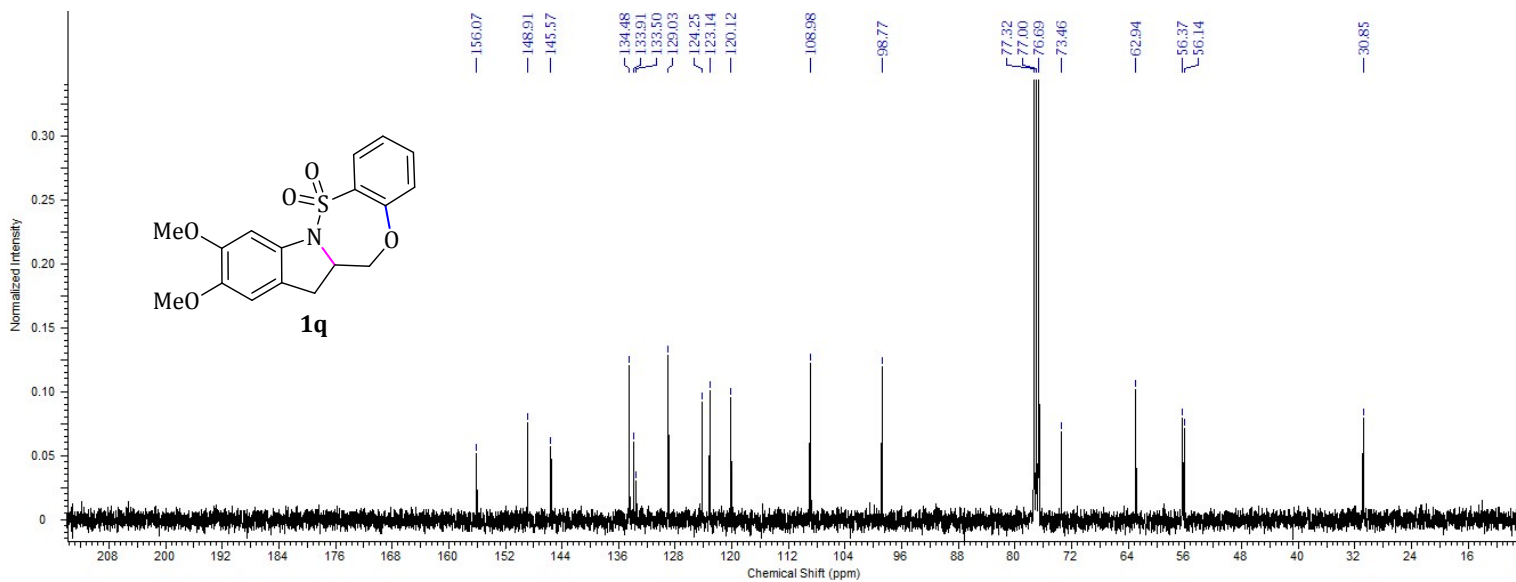

**<sup>13</sup>C NMR spectrum (100 MHz, CDCl<sub>3</sub>) of 1q**

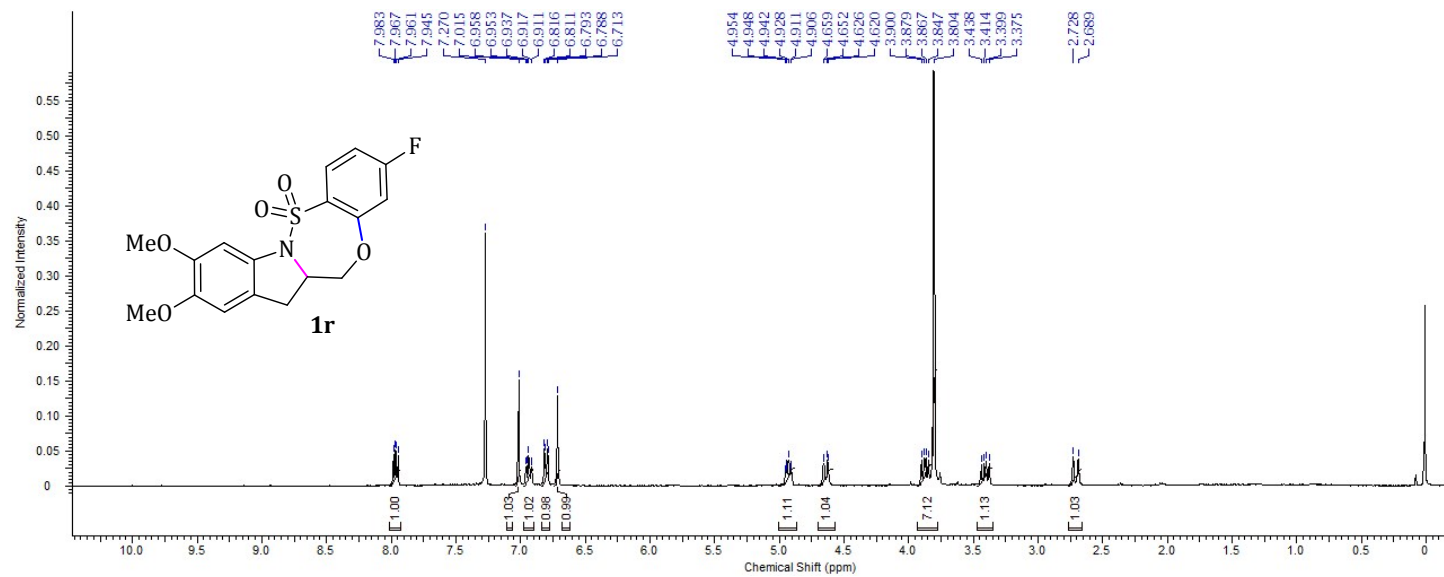

**<sup>1</sup>H NMR spectrum (400 MHz, CDCl<sub>3</sub>) of 1r**

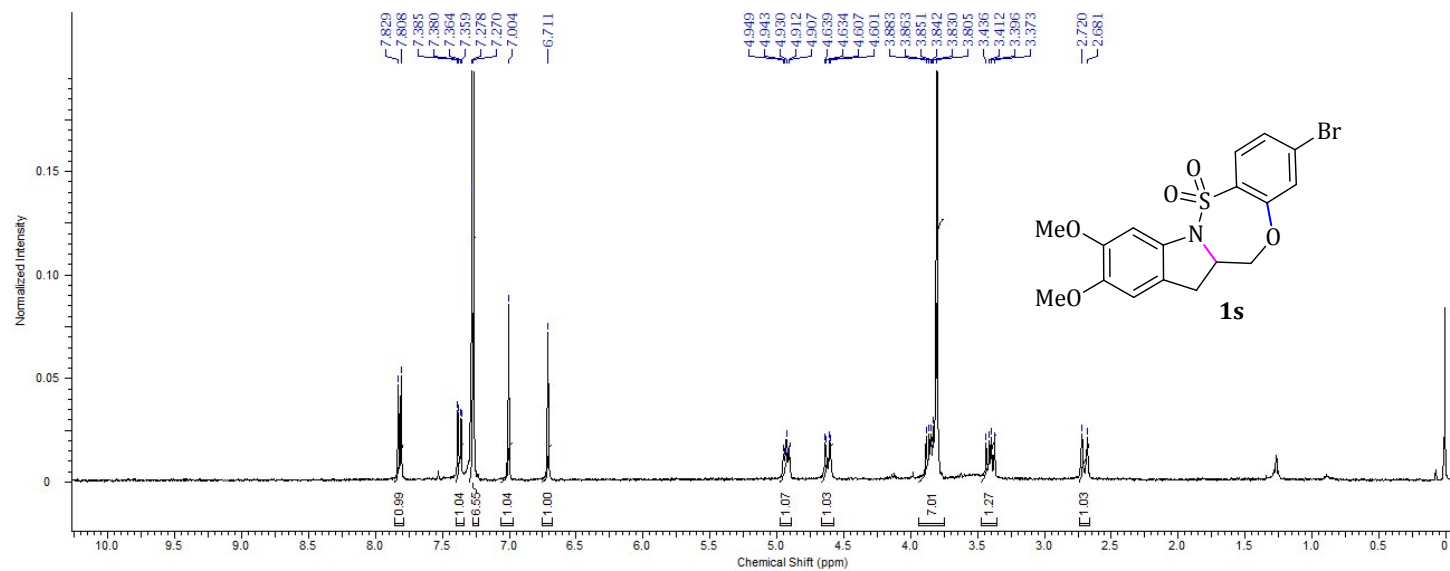

**<sup>1</sup>H NMR spectrum (400 MHz, CDCl<sub>3</sub>) of 1s**

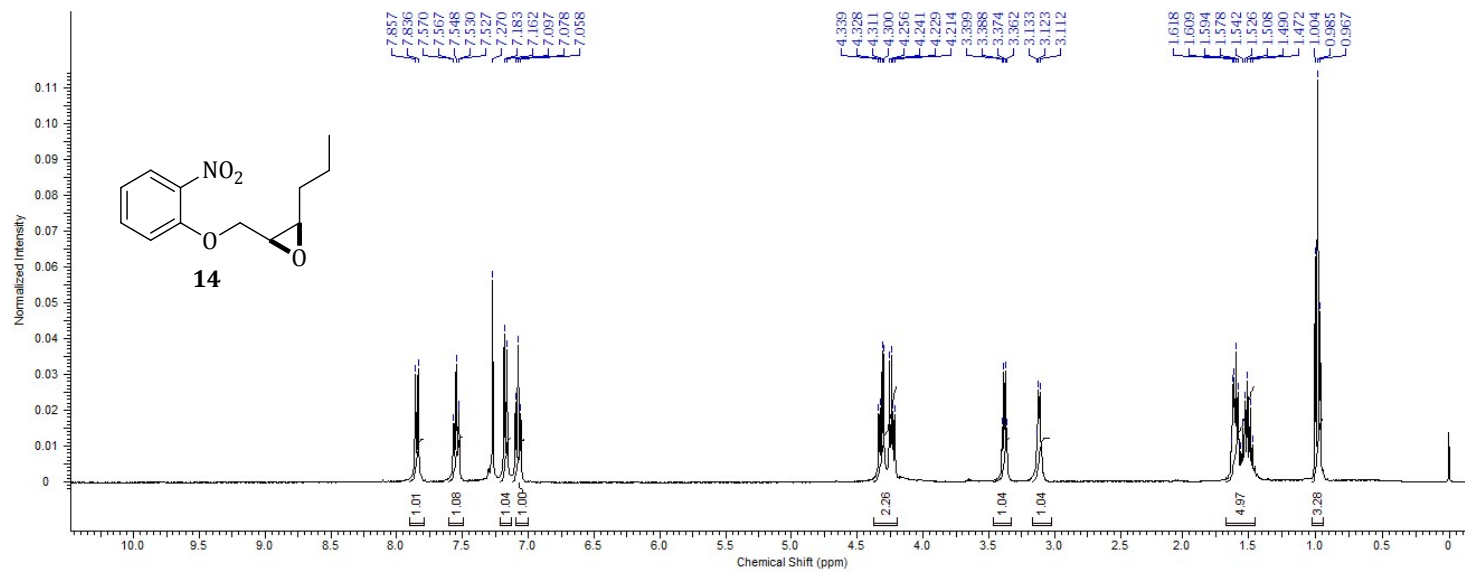

**<sup>1</sup>H NMR spectrum (400 MHz, CDCl<sub>3</sub>) of 14**

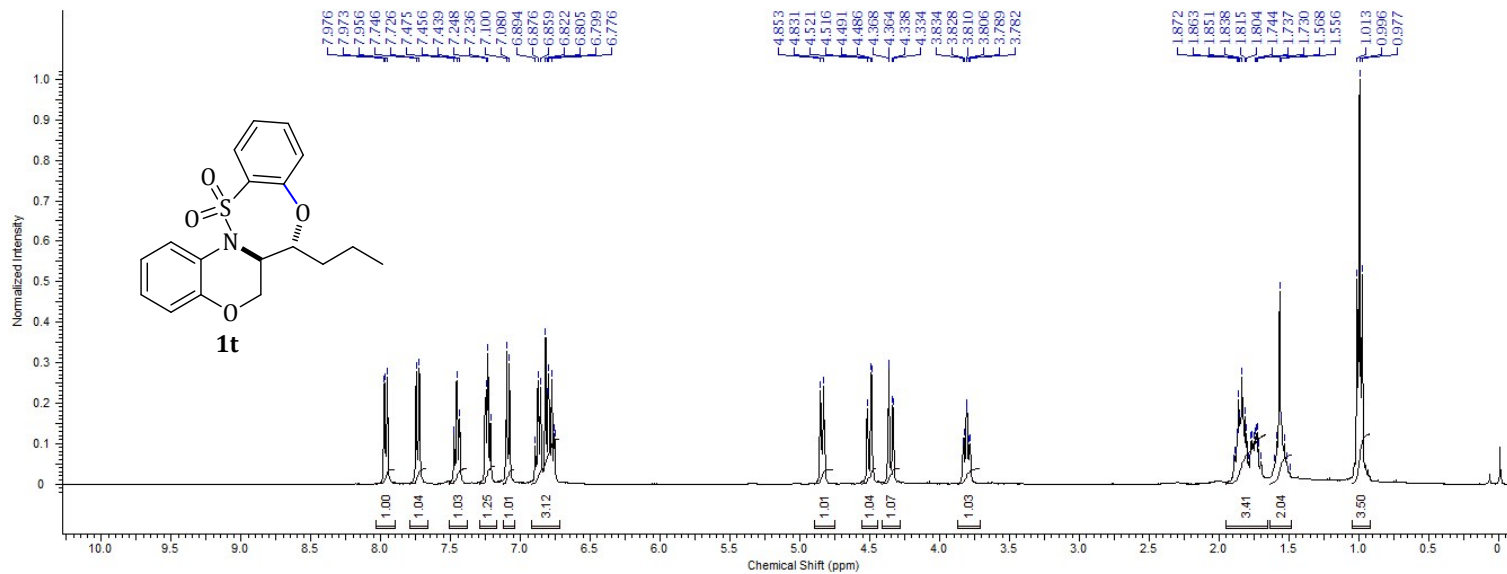

**<sup>1</sup>H NMR spectrum (400 MHz, CDCl<sub>3</sub>) of 1t**

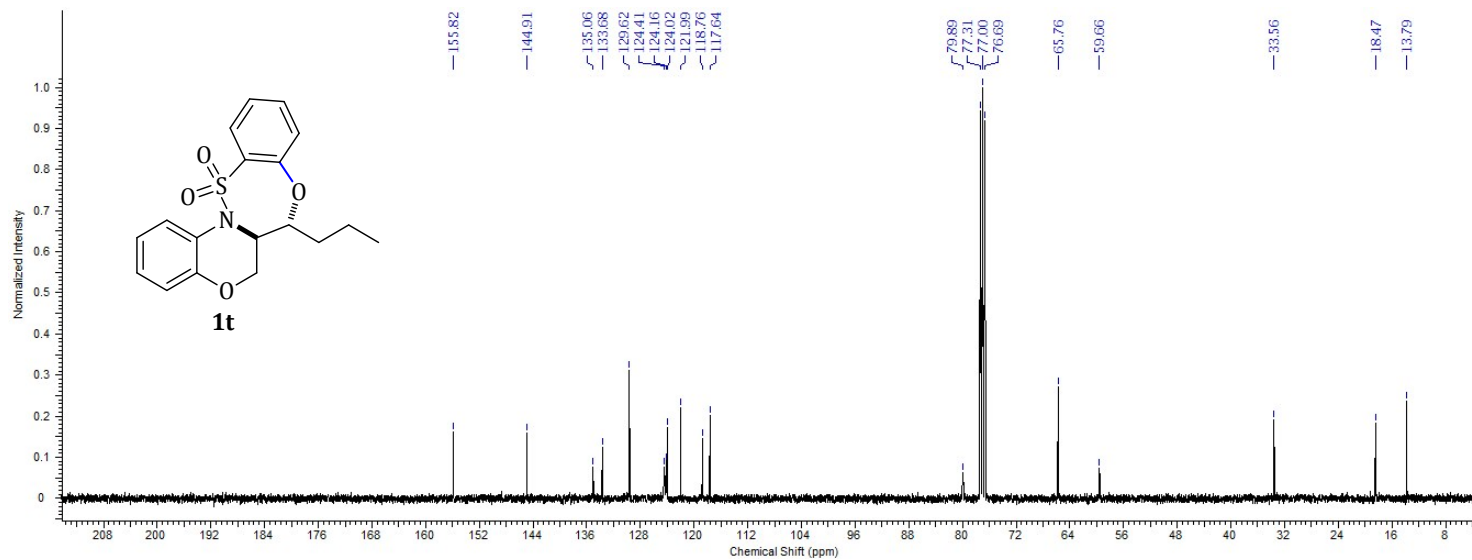

**<sup>13</sup>C NMR spectrum (100 MHz, CDCl<sub>3</sub>) of 1t**



## 8. Copies of $^{19}\text{F}$ spectra of selected final compounds

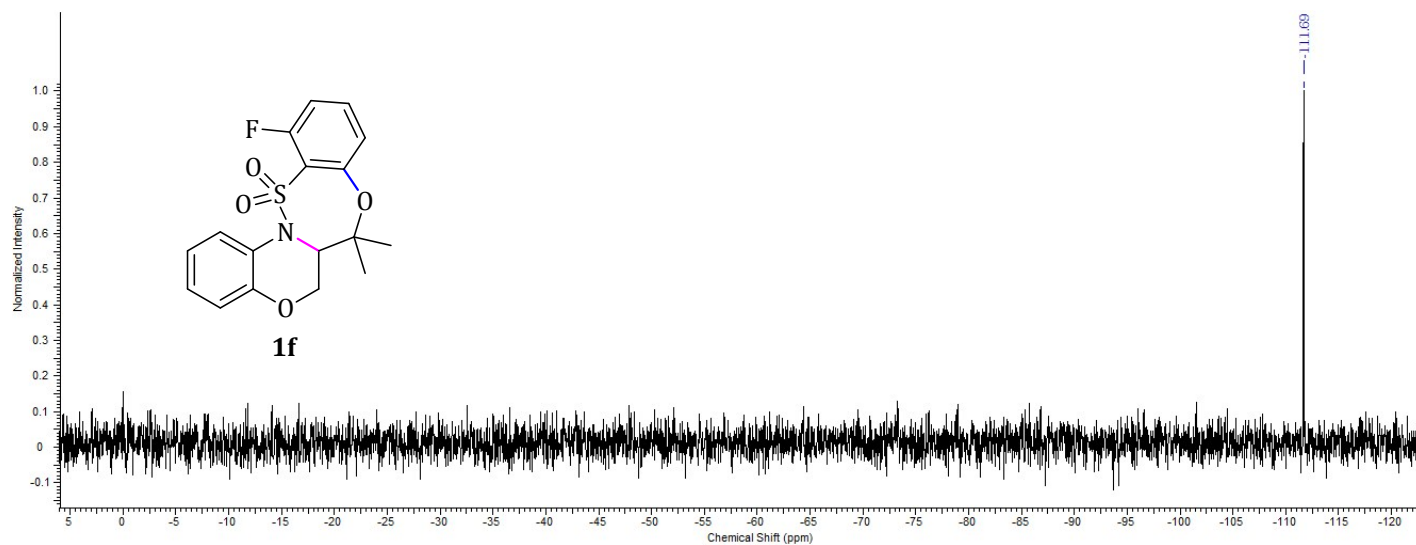

$^{19}\text{F}$  NMR spectrum (376.87 MHz,  $\text{CDCl}_3$ ) of **1f**

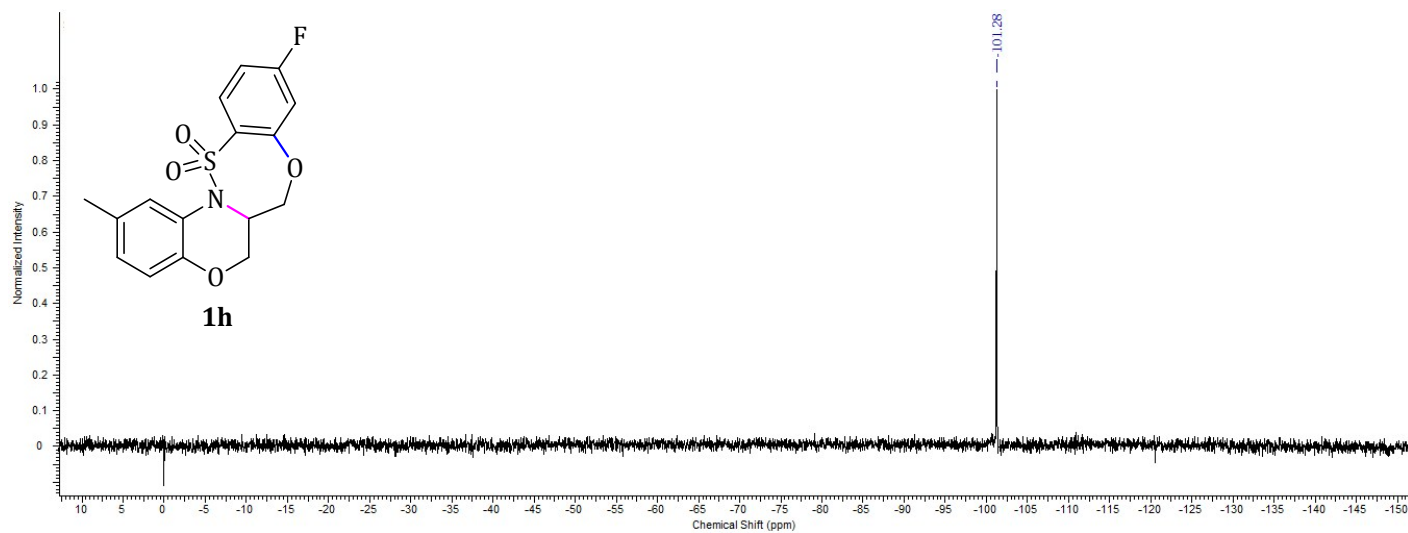

$^{19}\text{F}$  NMR spectrum (376.87 MHz,  $\text{CDCl}_3$ ) of **1h**

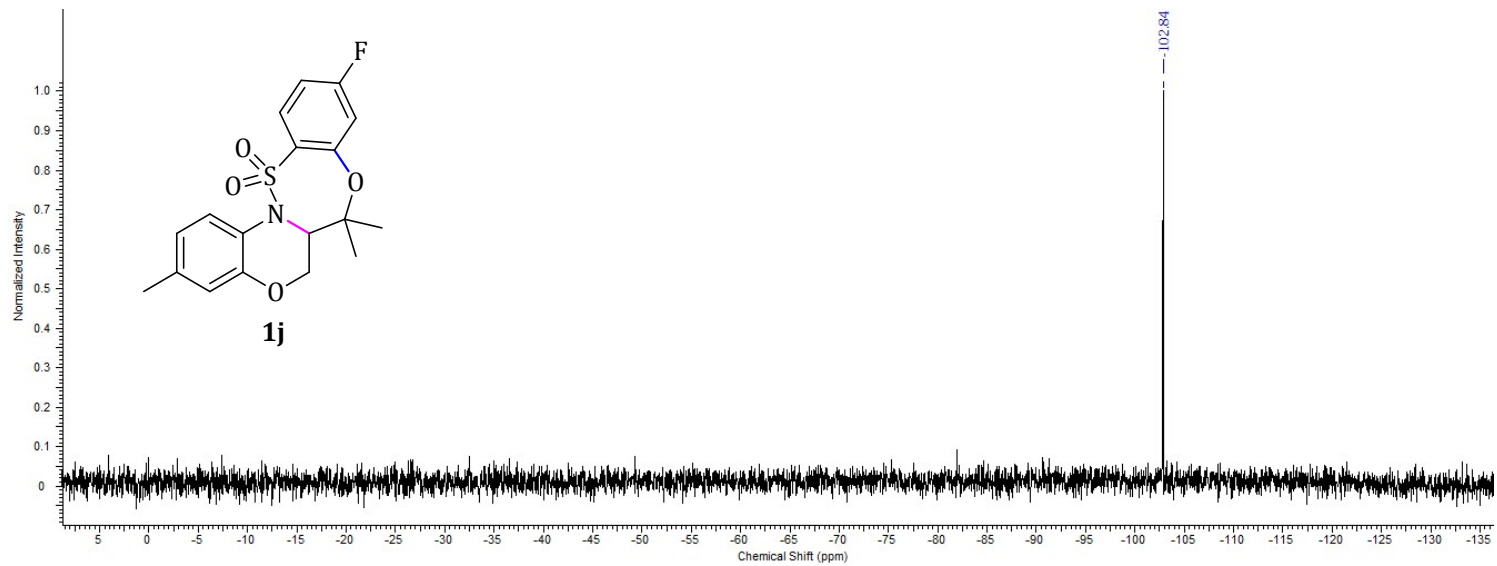

$^{19}\text{F}$  NMR spectrum (376.87 MHz,  $\text{CDCl}_3$ ) of **1j**

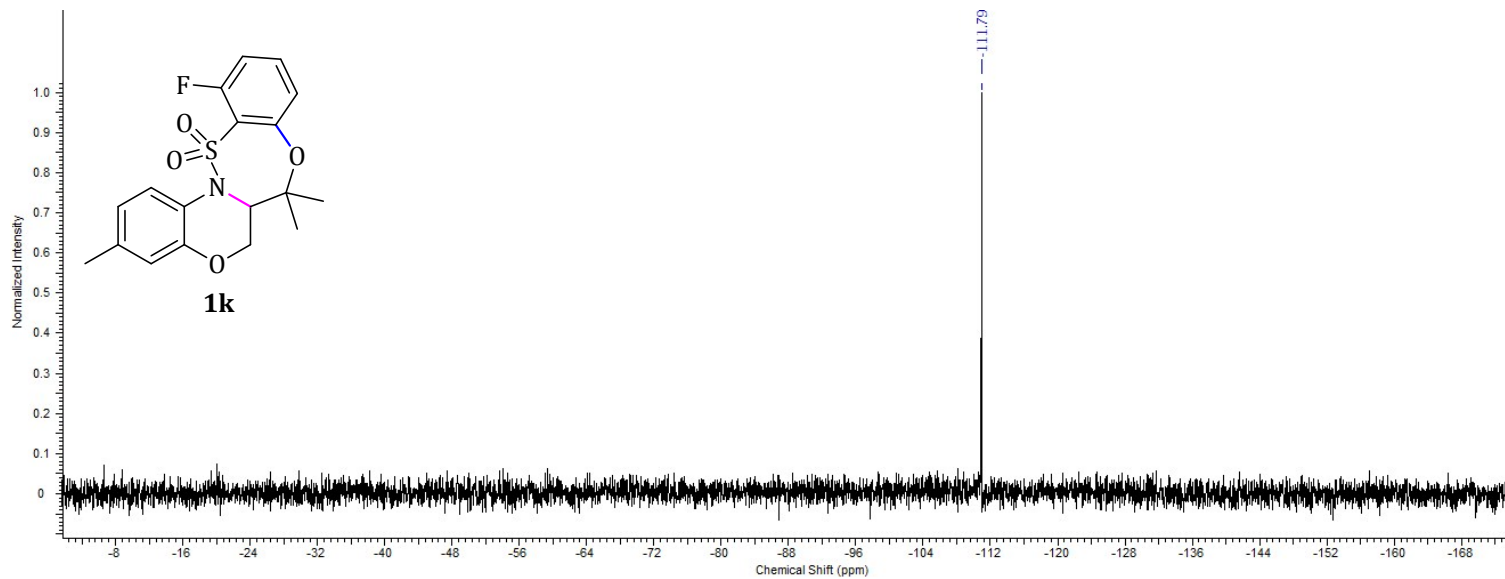

$^{19}\text{F}$  NMR spectrum (376.87 MHz,  $\text{CDCl}_3$ ) of **1k**

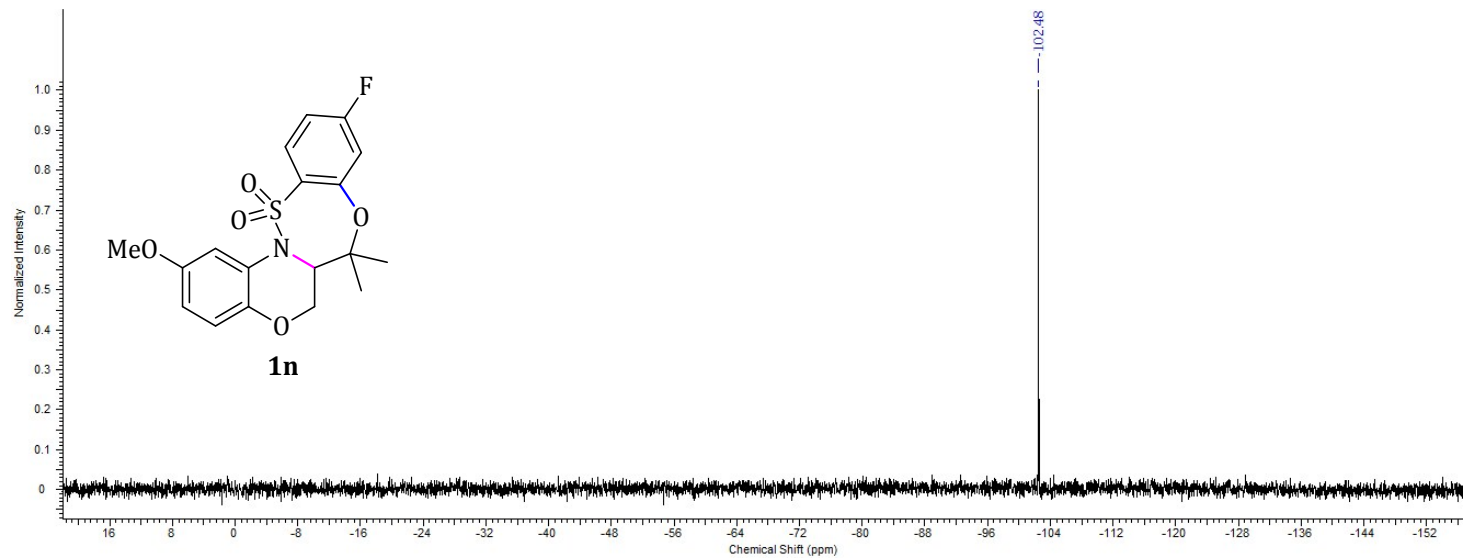

$^{19}\text{F}$  NMR spectrum (376.87 MHz,  $\text{CDCl}_3$ ) of **1n**

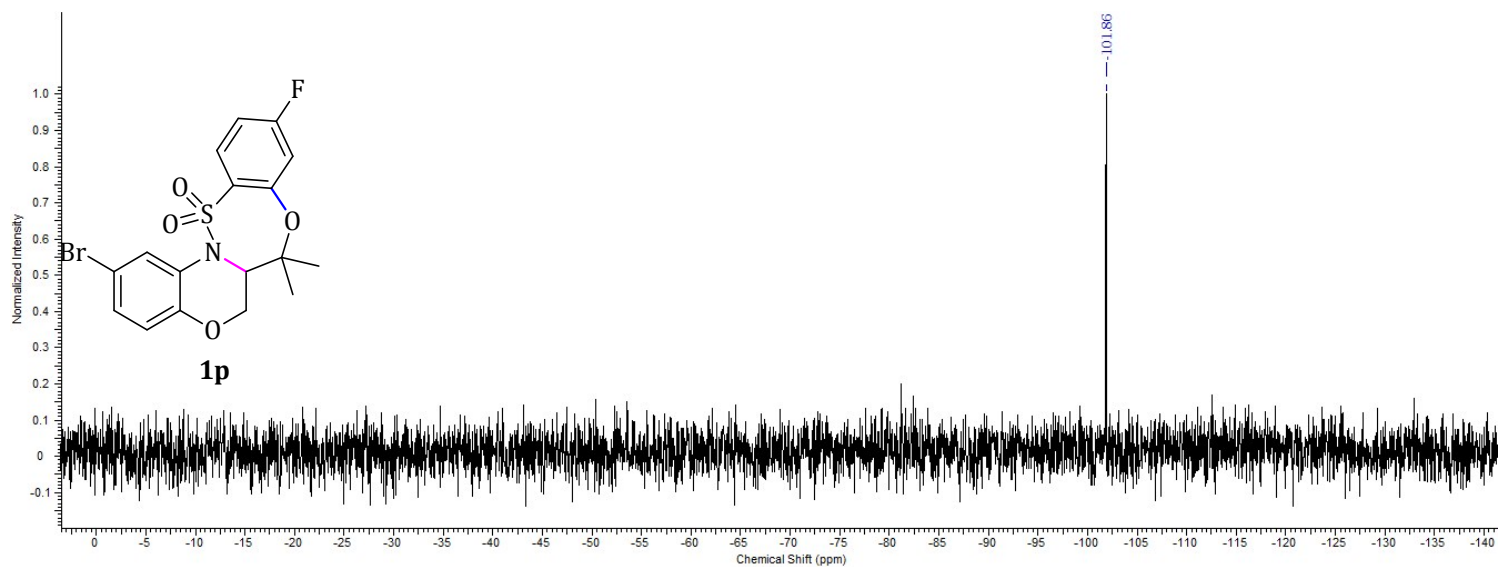

$^{19}\text{F}$  NMR spectrum (376.87 MHz,  $\text{CDCl}_3$ ) of **1p**

## 9. HRMS data of final compounds

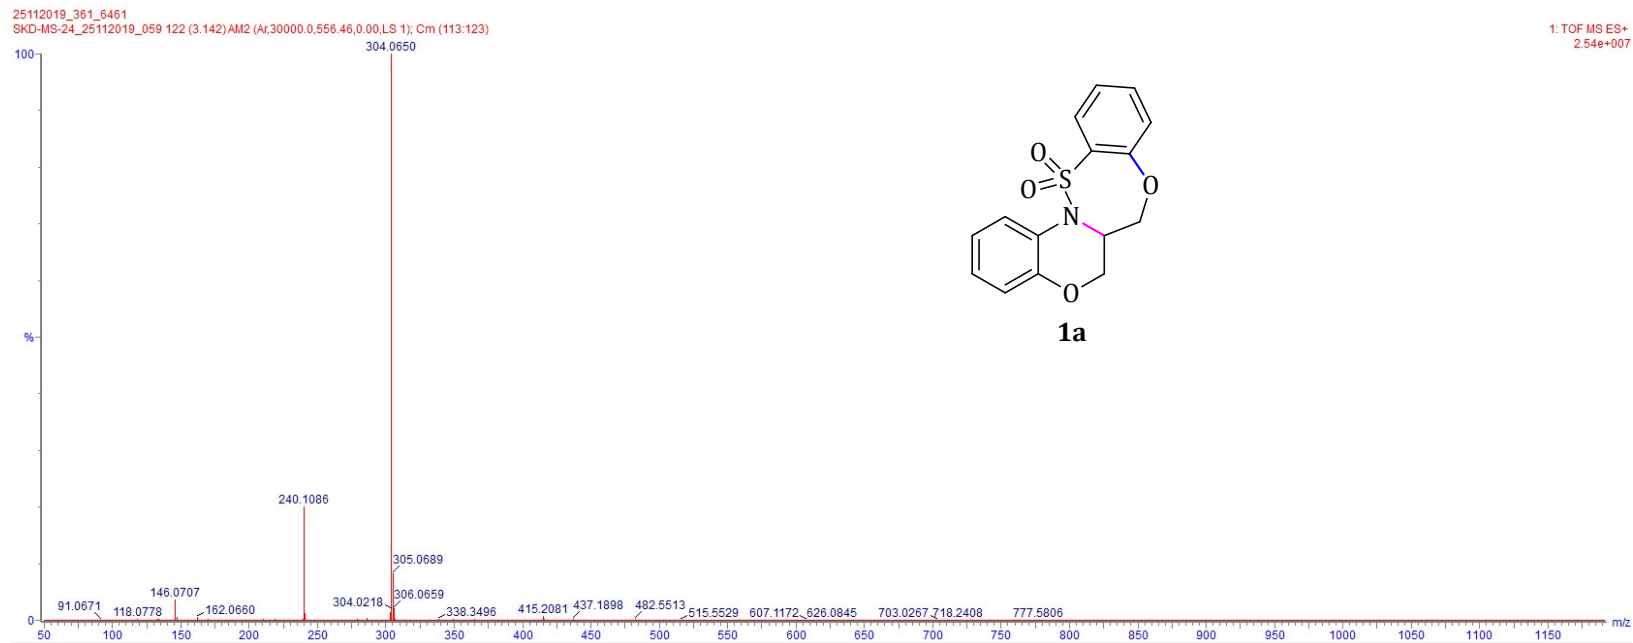

HRMS of compound 1a

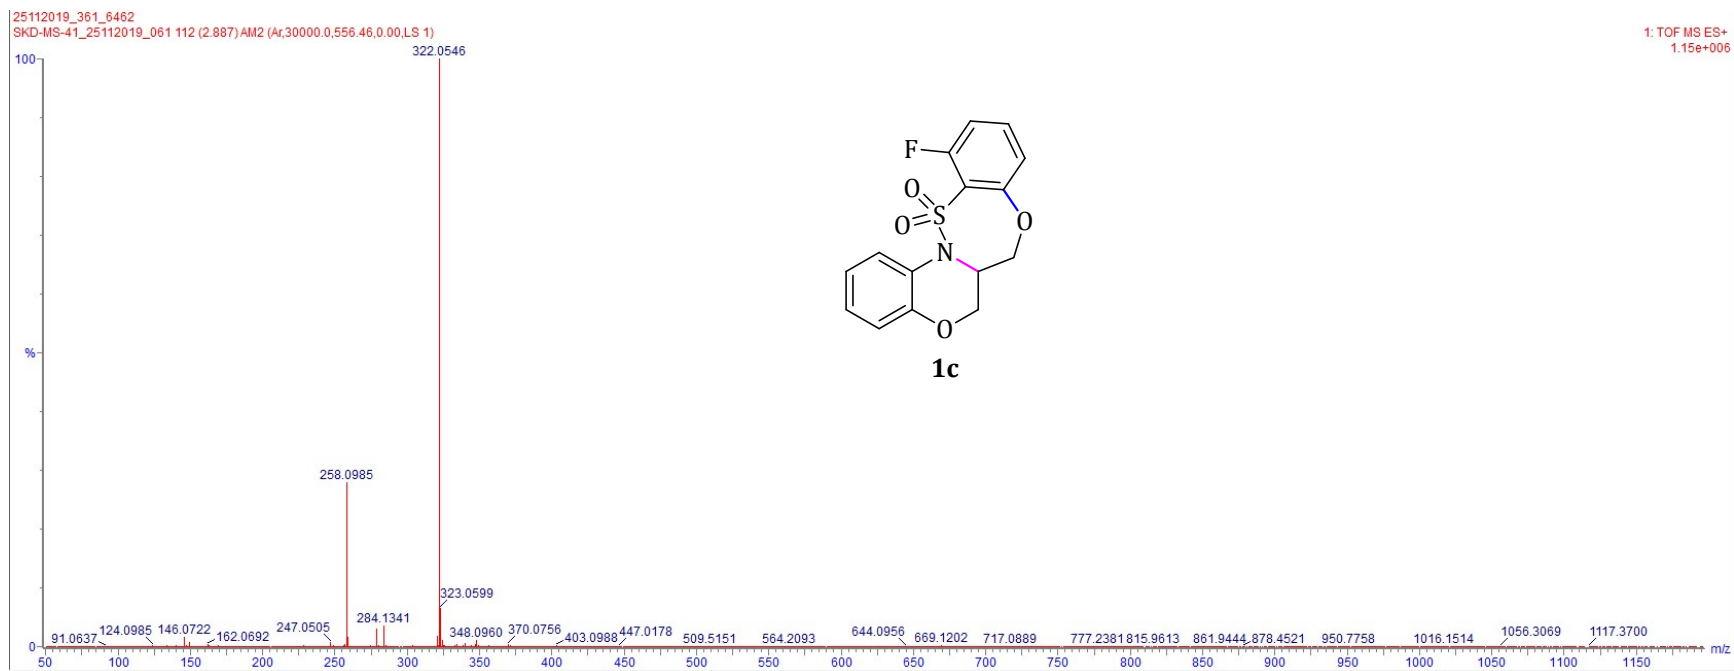

HRMS of compound **1c**

25112019\_361\_6463  
SKD-MS-94\_25112019\_062 129 (3.327) AM2 (Ar,30000,0.556.44,0.00,LS 1); Cm (123:130)

1: TOF MS ES+  
4.75e+006

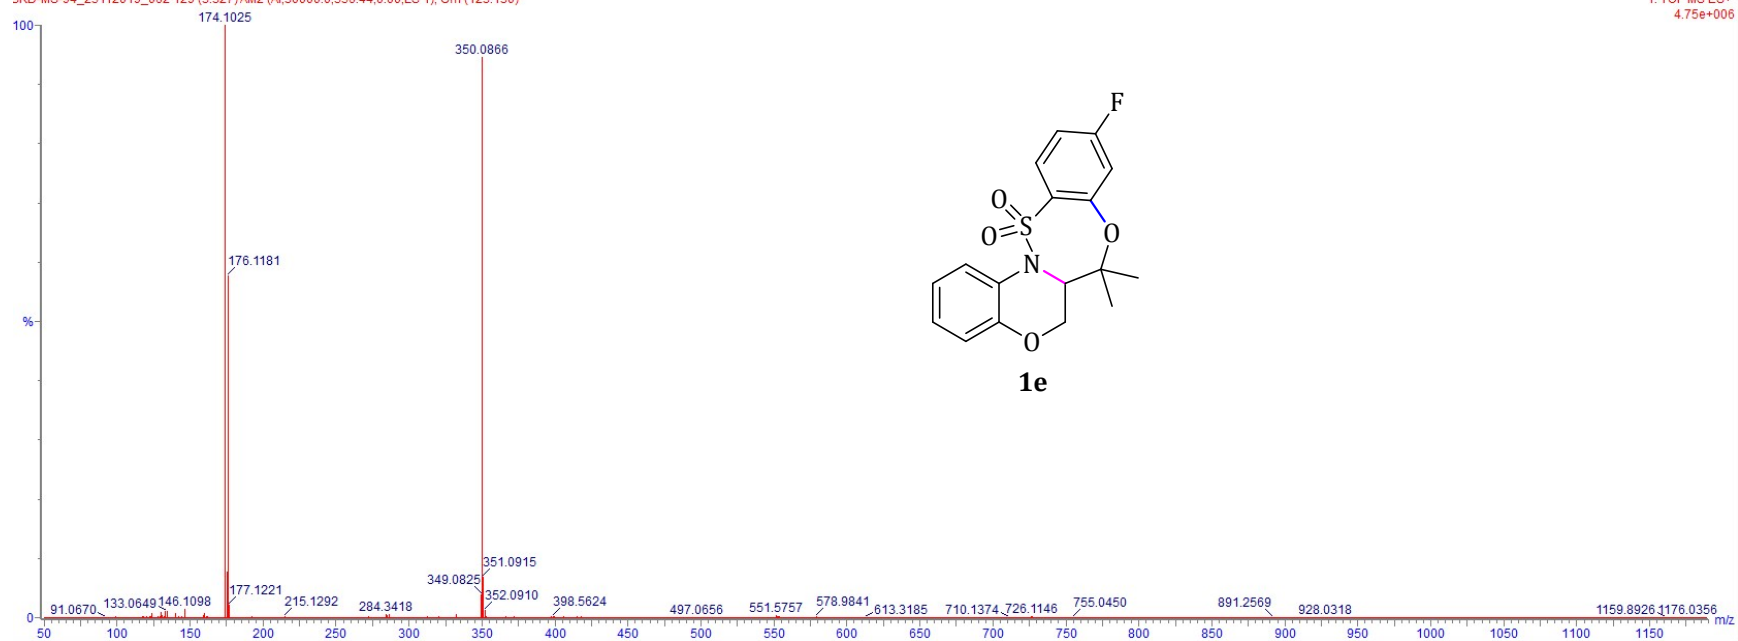

HRMS of compound **1e**

25112019\_361\_6458

3KD-MS-100\_25112019\_055 121 (3.116) AM2 (Ar,30000.0,556.44,0.00,LS 1)

1: TOF MS ES+  
1.16e+006

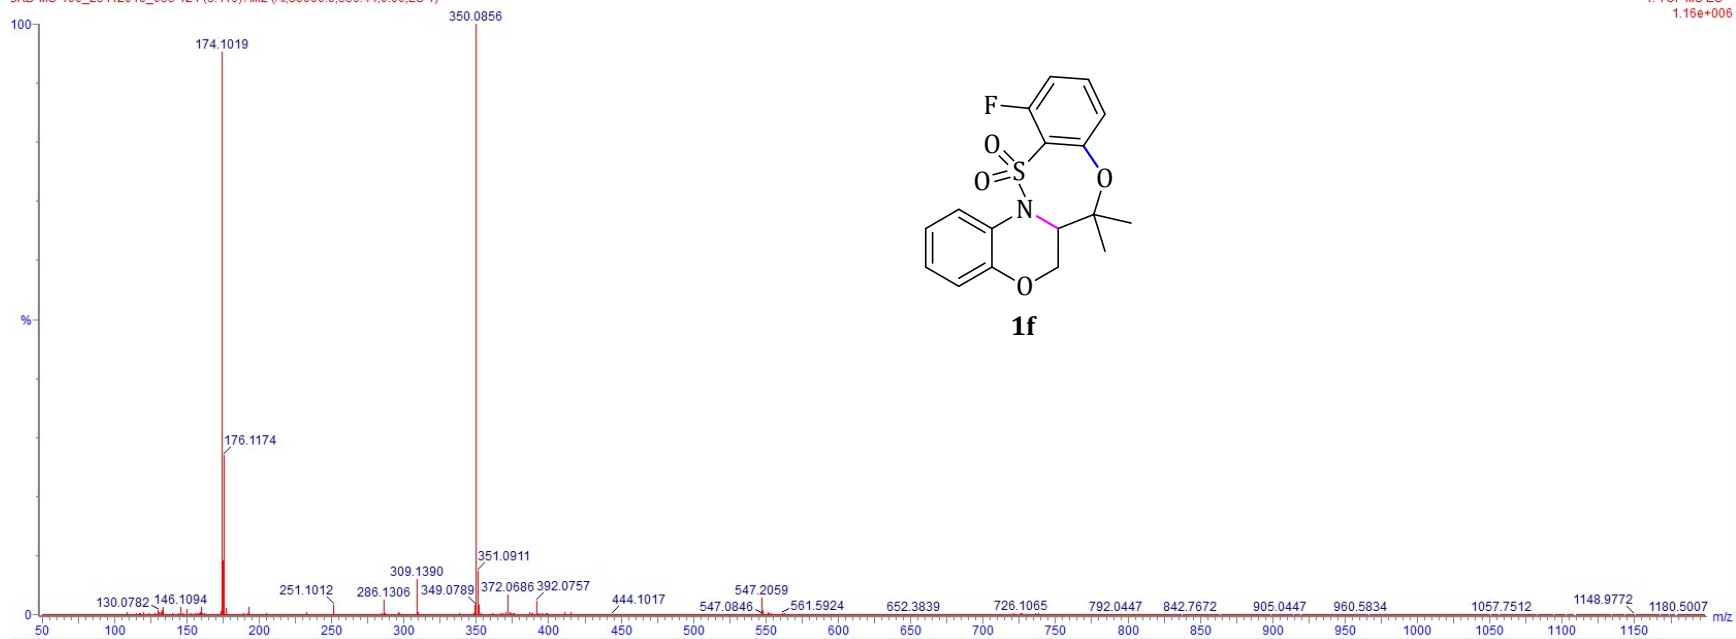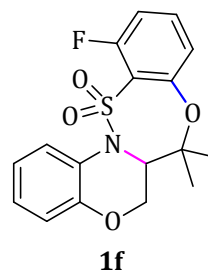

HRMS of compound 1f

15112019\_361\_6465

3KD-MS-327\_25112019\_065 130 (3.352) AM2 (Ar,30000.0,556.28,0.00,LS 1)

1: TOF MS ES+  
1.08e+006

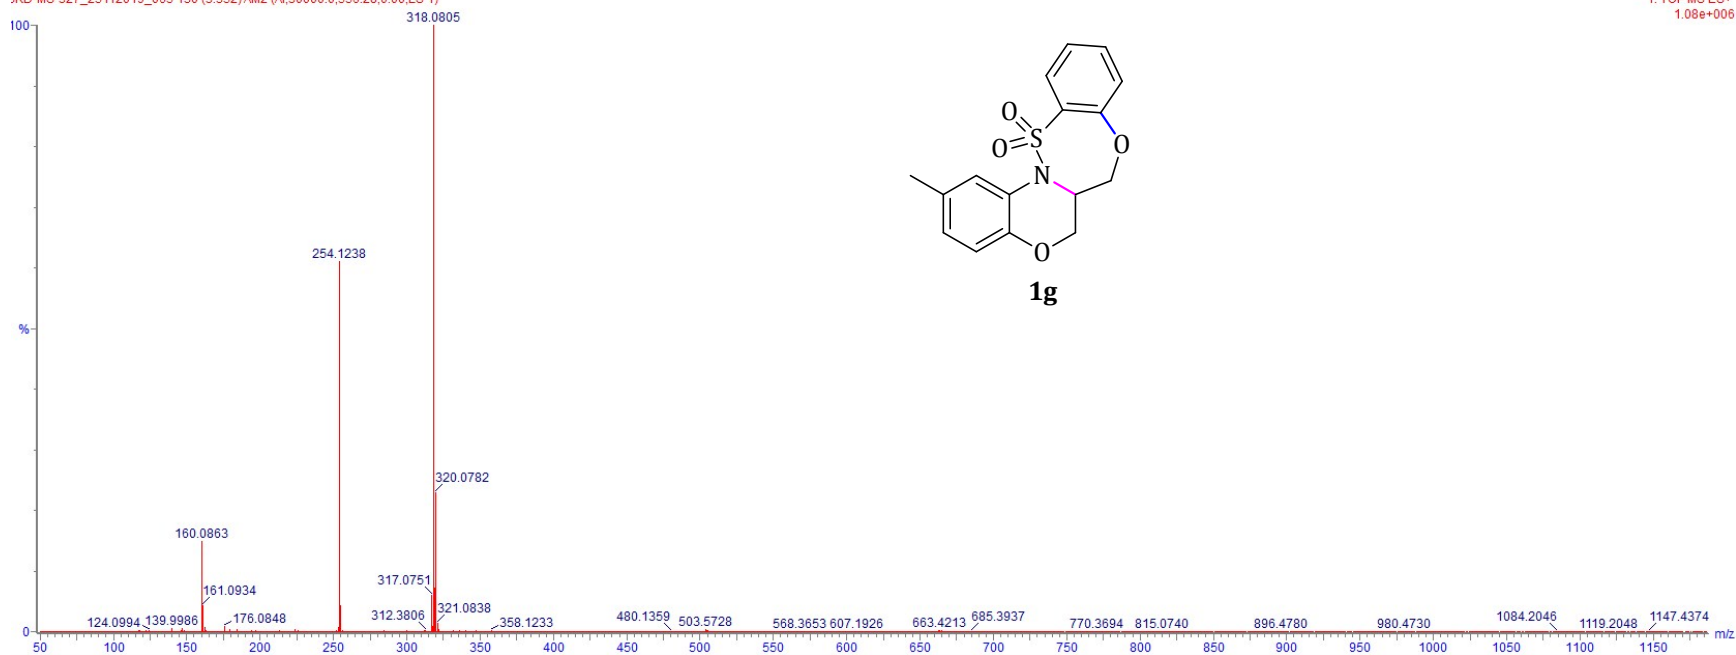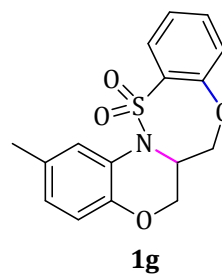

HRMS of compound 1g



25112019\_359\_6451  
SKD-MS-332\_25112019\_046 123 (3.167) AM2 (Ar,30000.0,556.44,0.00,LS 1)

1: TOF MS ES+  
4.21e+006

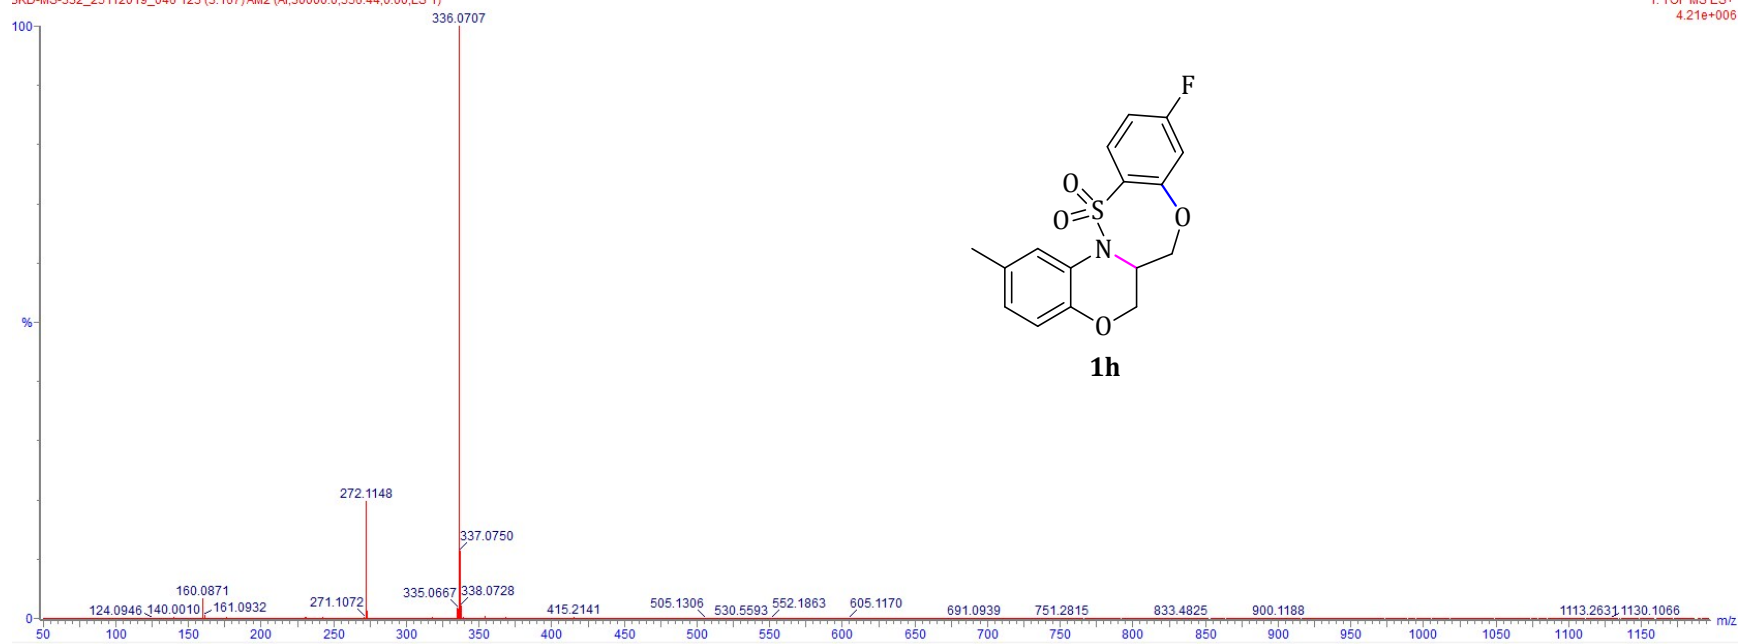

HRMS of compound 1h

25112019\_359\_6452  
SKD-MS-356\_25112019\_047 128 (3.295)AM2 (Ar,30000.0,556.26,0.00,LS 1)

1: TOF MS ES+  
4.62e+005

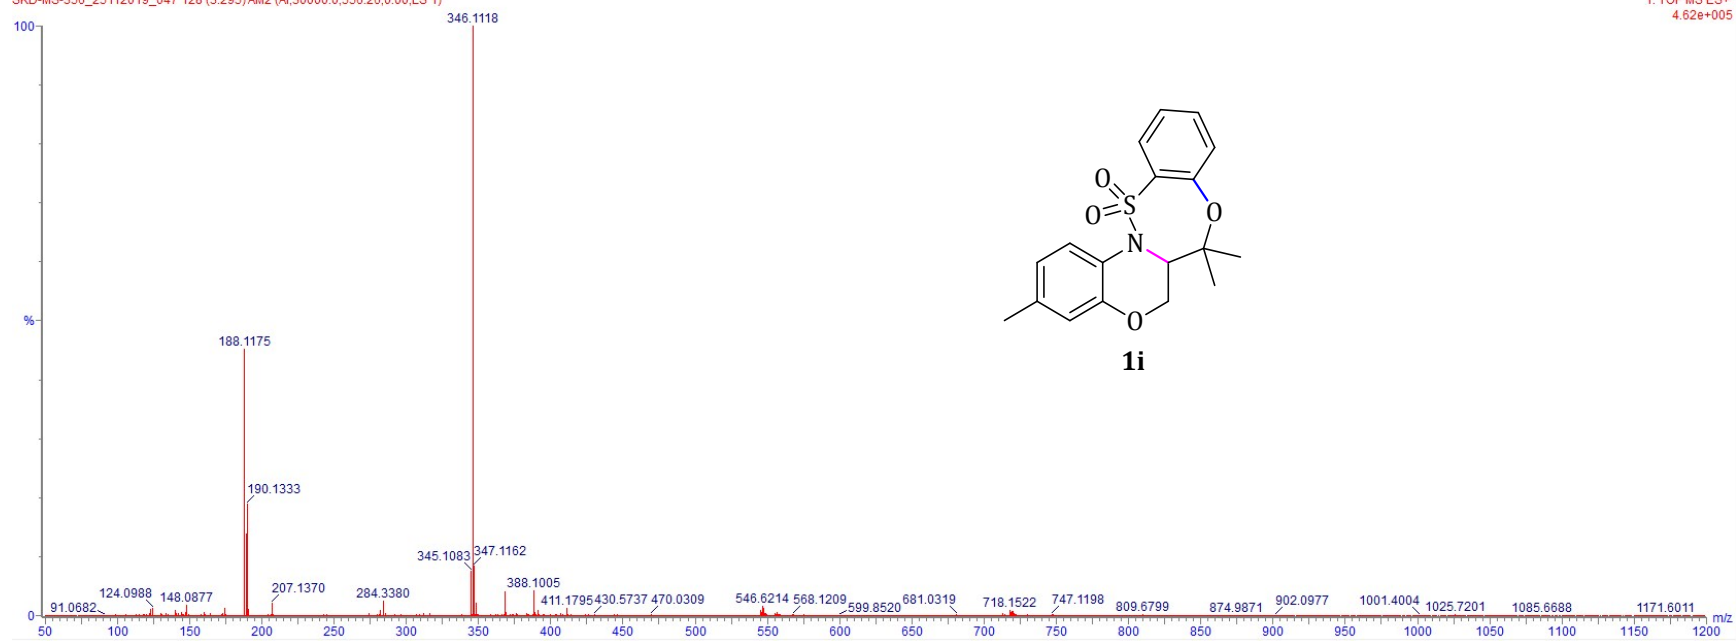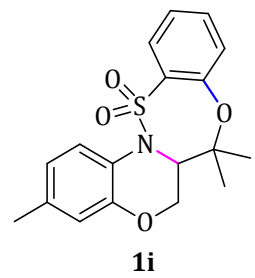

**HRMS of compound 1i**

25112019\_359\_6450  
3KD-MS-363\_25112019\_045 140 (3.607)AM2 (Ar,30000.0,556.38,0.00,LS 1)

1: TOF MS ES+  
8.79e+005

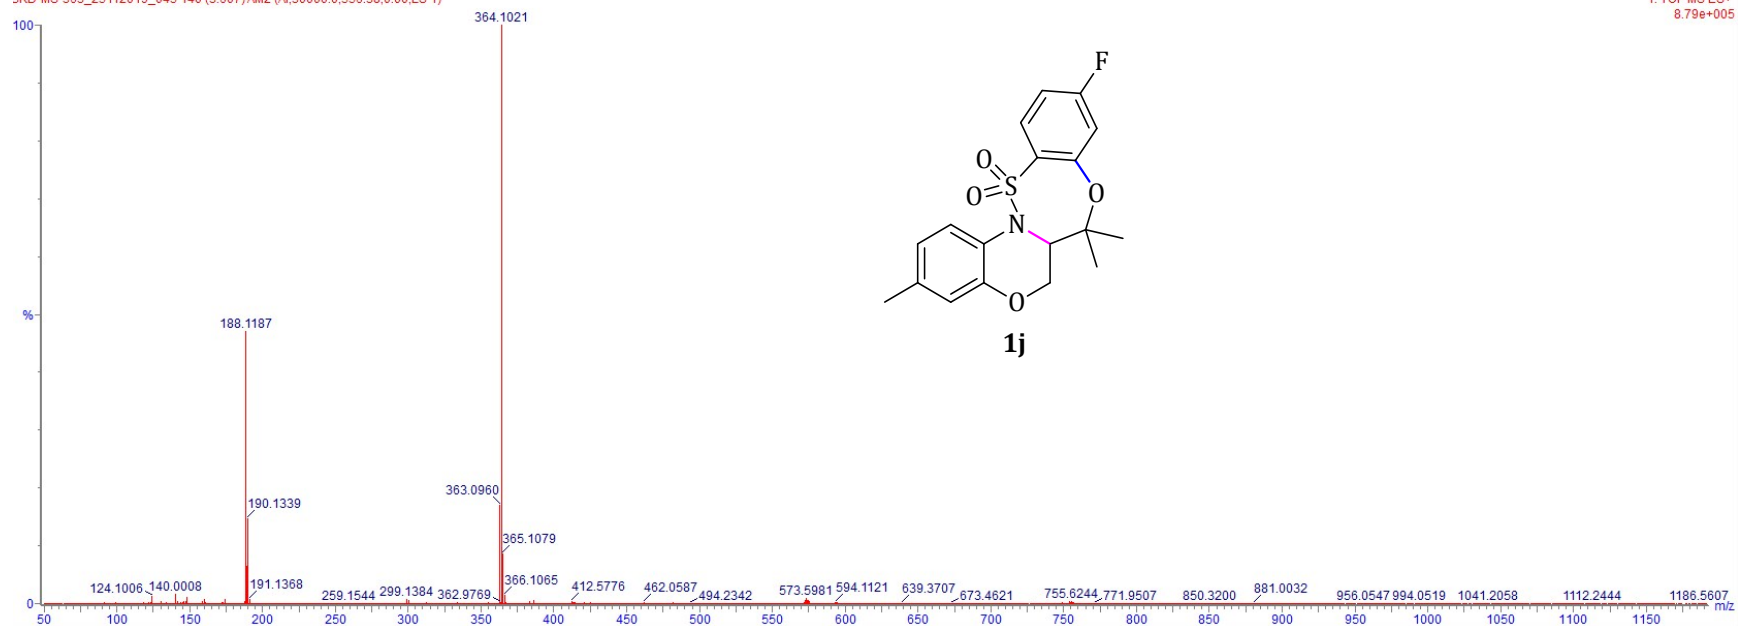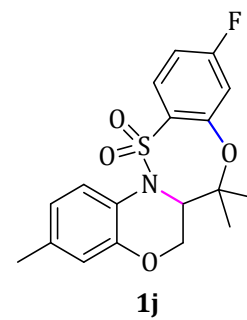

HRMS of compound 1j

25112019\_359\_6453  
SKD-MS-366\_25112019\_049 123 (3.167) AM2 (Ar,30000.0,556.48,0.00,LS 1)

1: TOF MS ES+  
2.63e+006

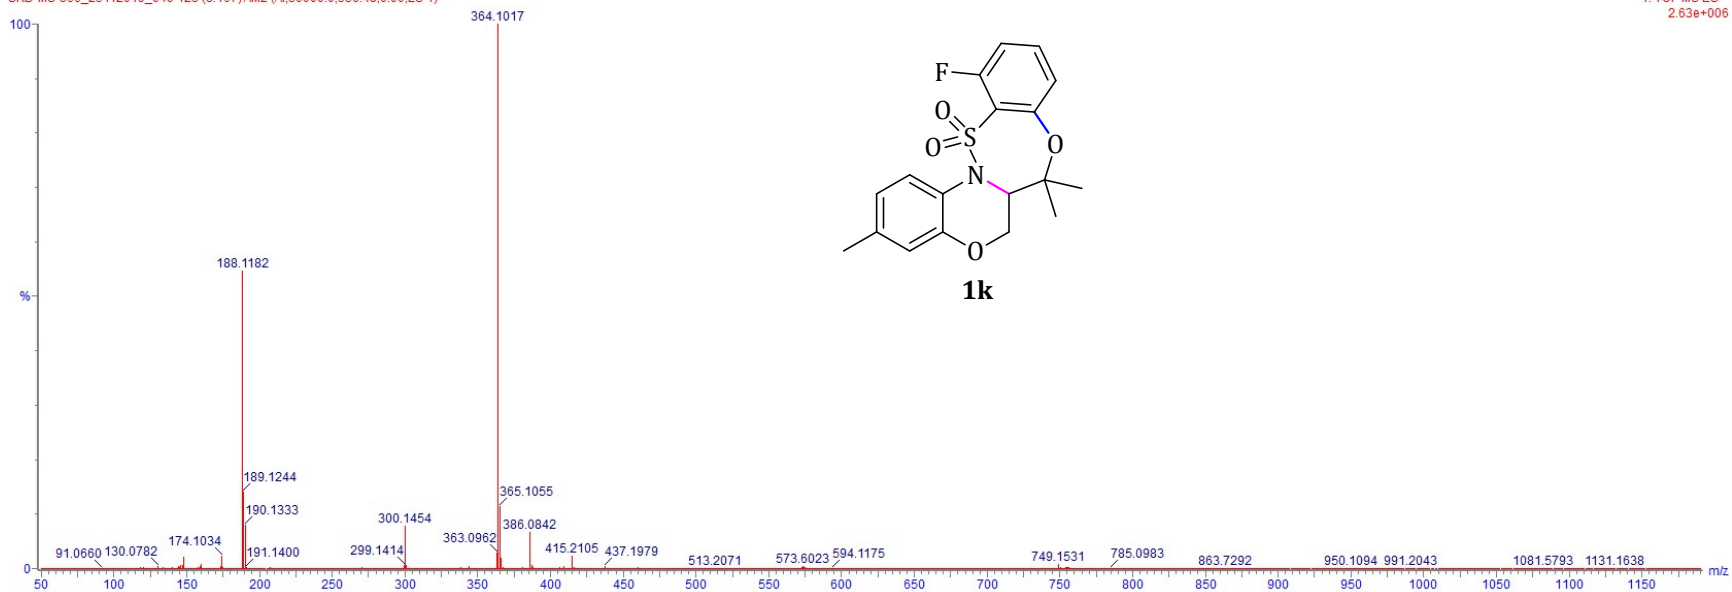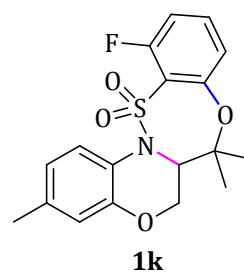

HRMS of compound 1k

5112019\_359\_6454

SKD-MS-373\_25112019\_050 127 (3.269) Cm (119:129)

1: TOF MS ES+  
2.34e7

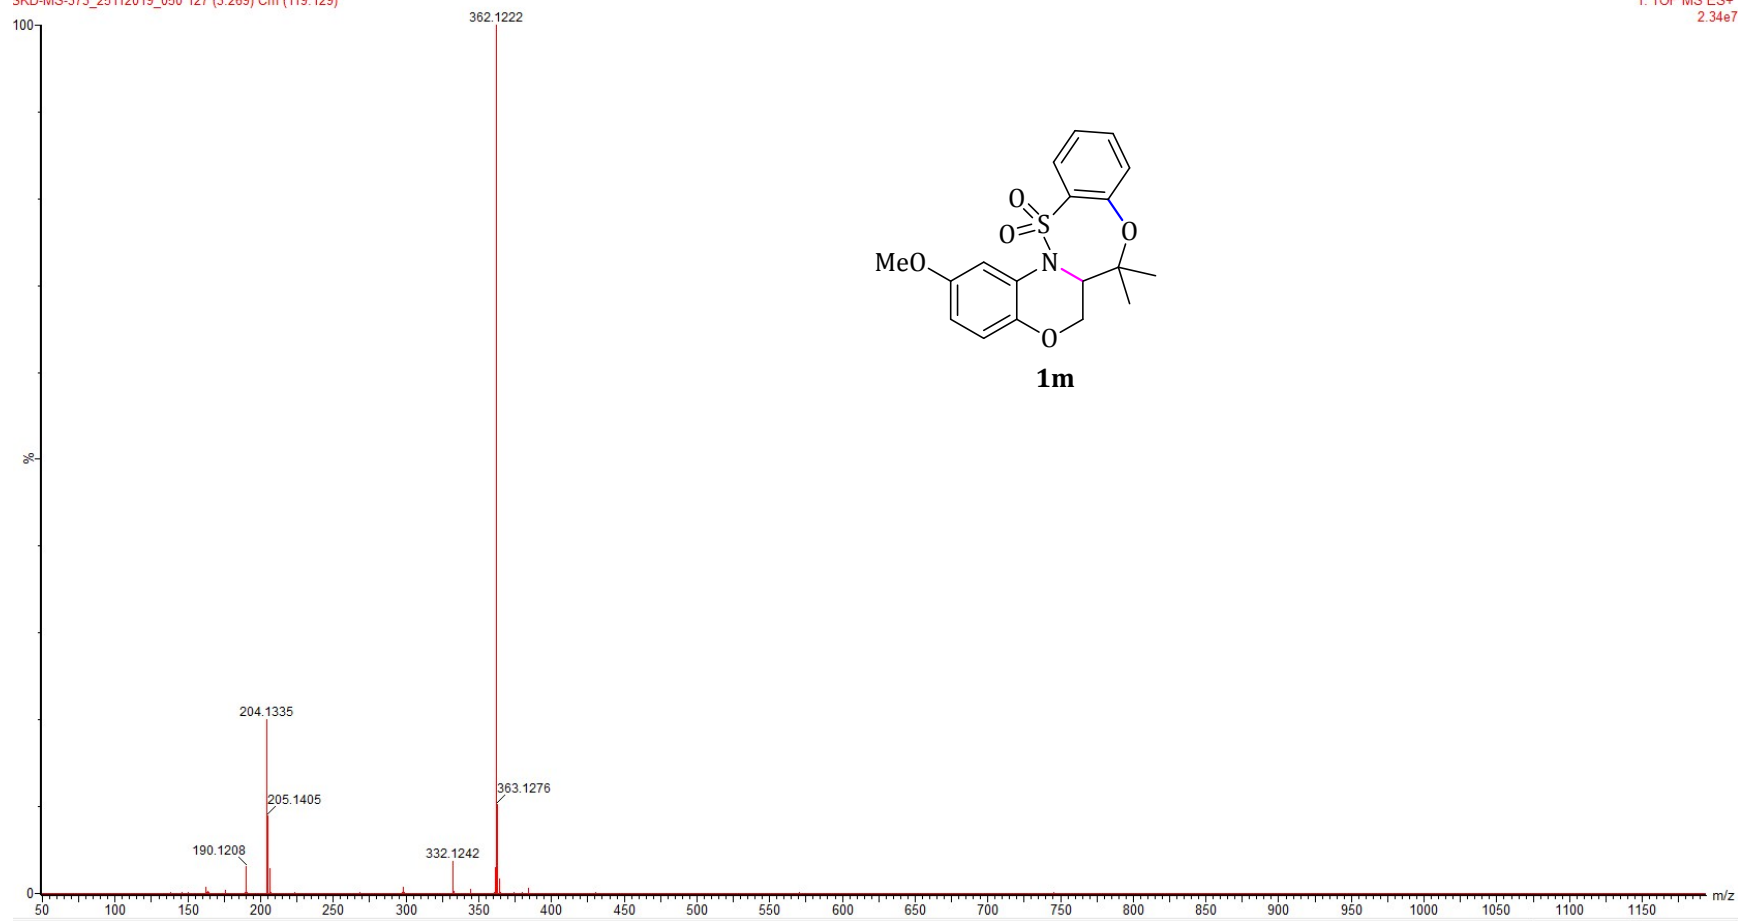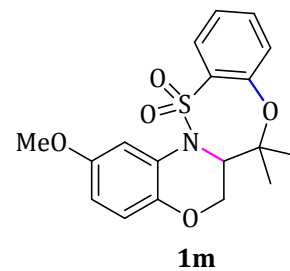

HRMS of compound 1m

25112019\_359\_6455  
SKD-MS-376\_25112019\_051 122 (3.142)AM2 (Ar,30000,0.556,26,0.00,LS 1)

1: TOF MS ES+  
5.06e+006

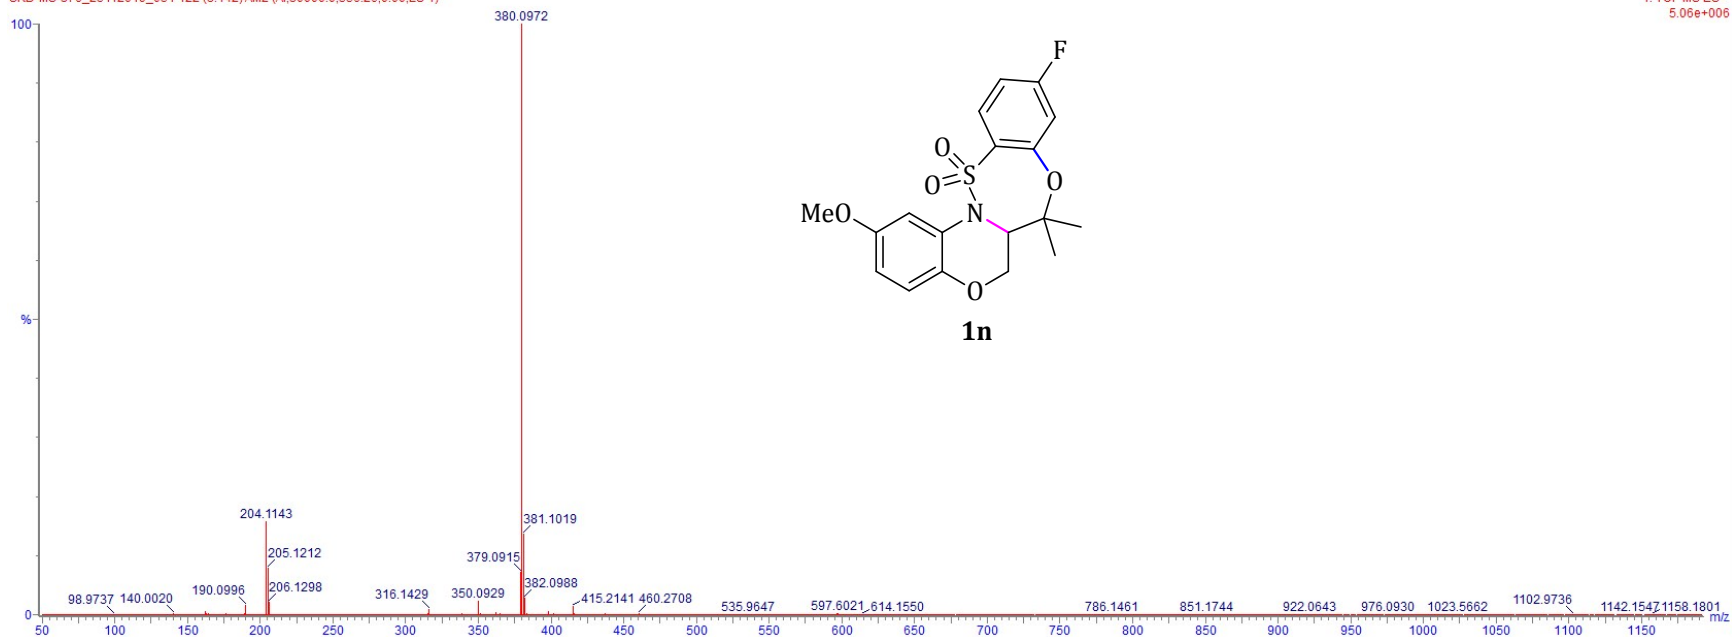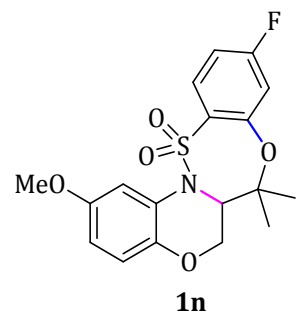

HRMS of compound 1n

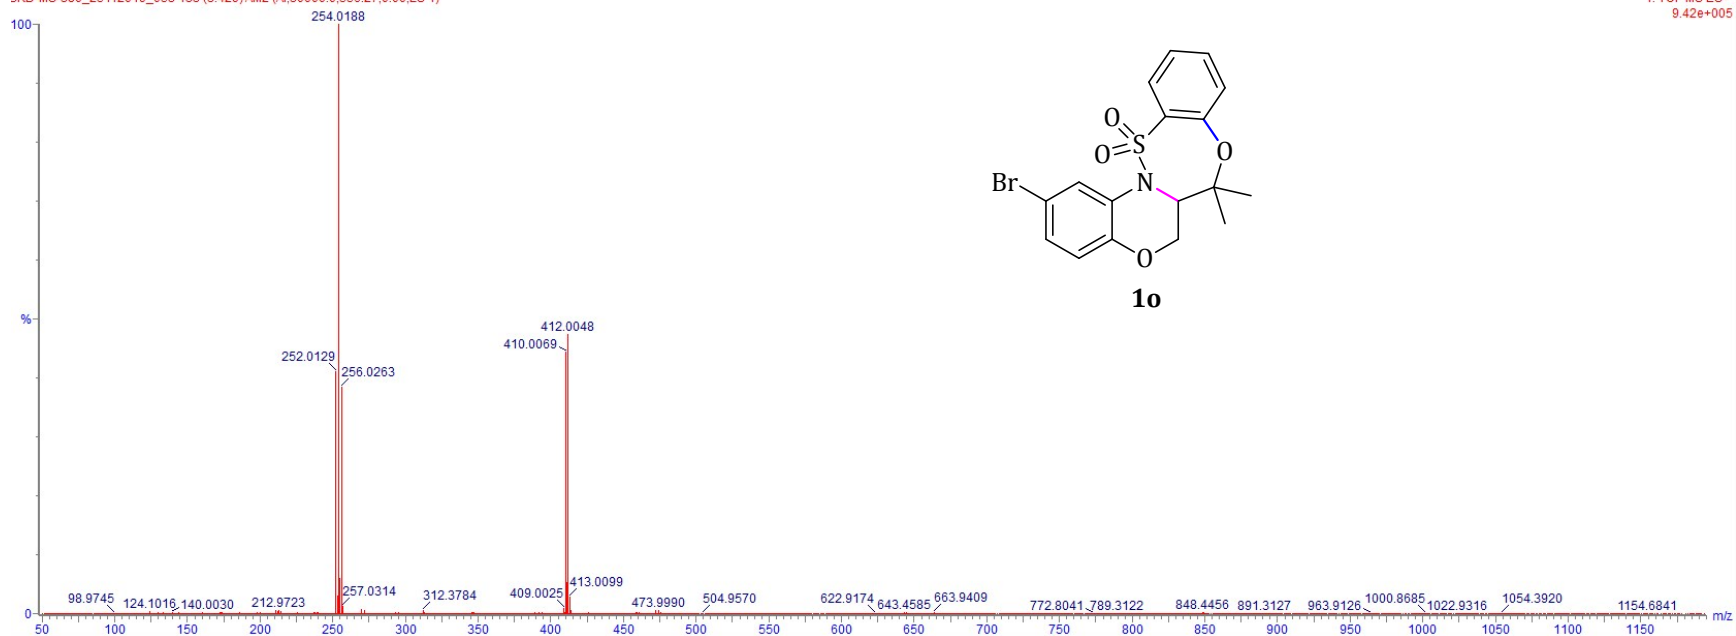

HRMS of compound 1o

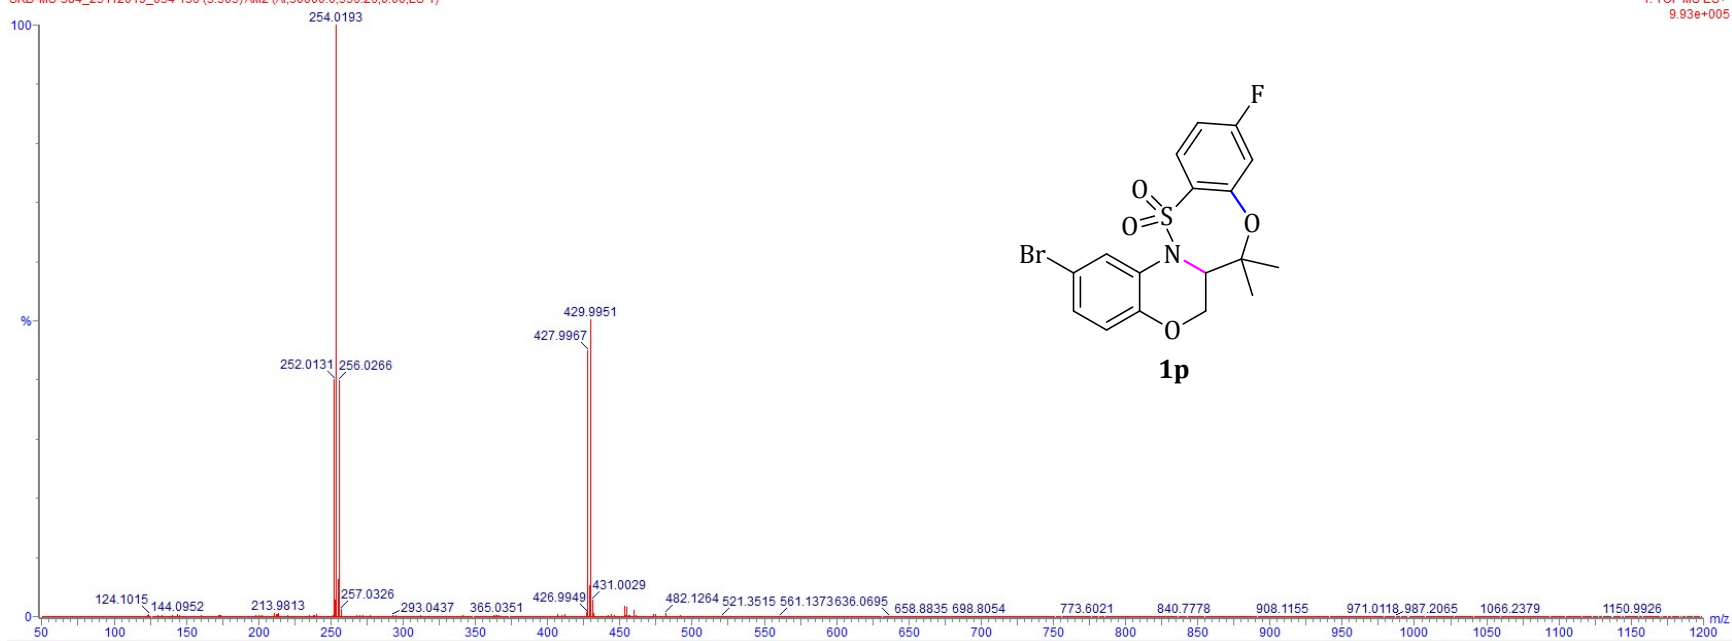

HRMS of compound 1p



25112019\_361\_6464  
SKD-MS-261\_25112019\_064 103 (2.658)AM2 (Ar,30000.0,556.44,0.00,LS 1)

1: TOF MS ES+  
1.41e+006

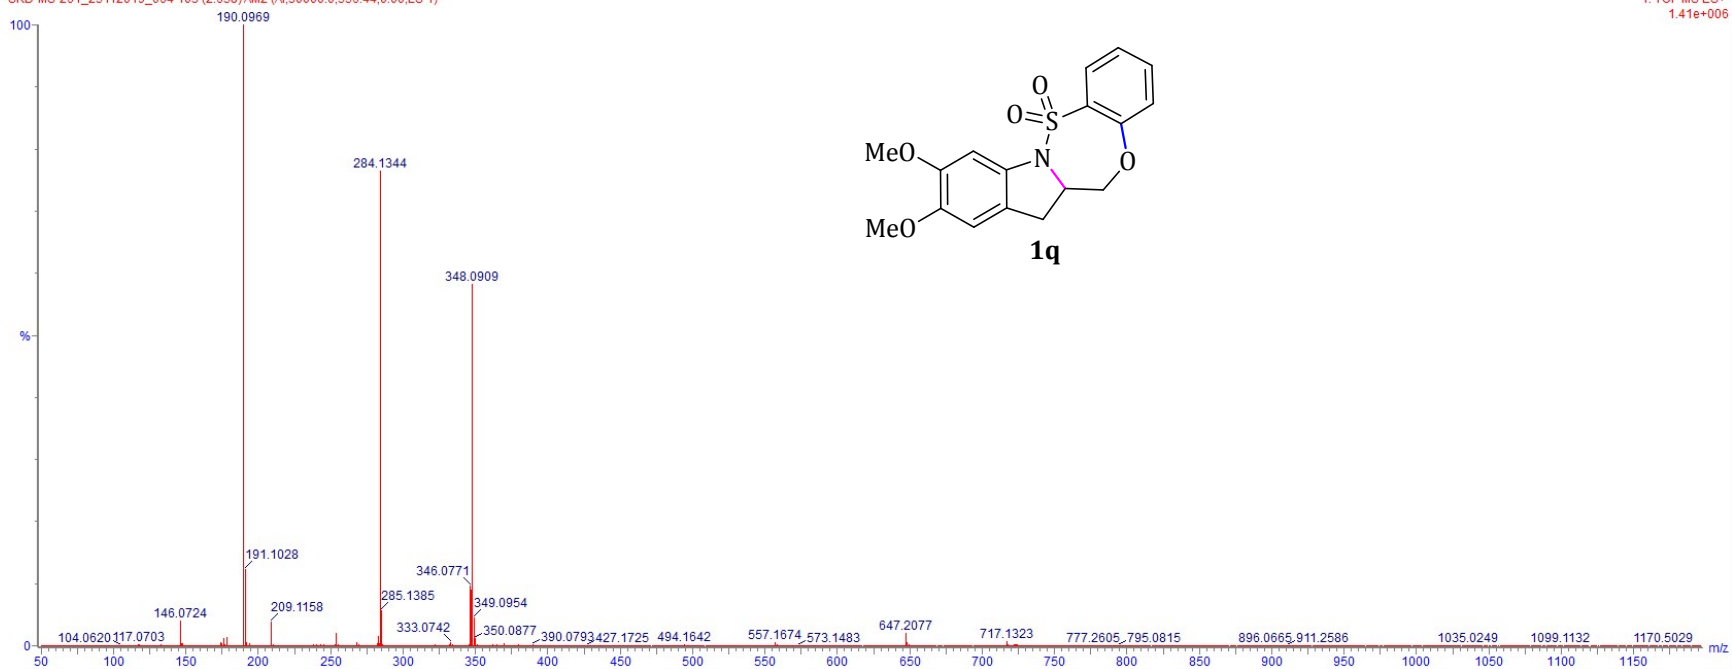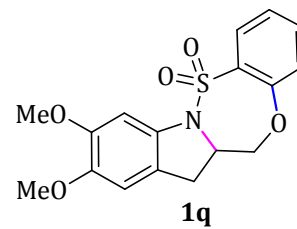

HRMS of compound 1q

5112019\_361\_6460  
KD-MS-267\_25112019\_058 120 (3.091)AM2 (Ar,30000.0,556.46,0.00,LS 1)

1: TOF MS ES+  
3.43e+006

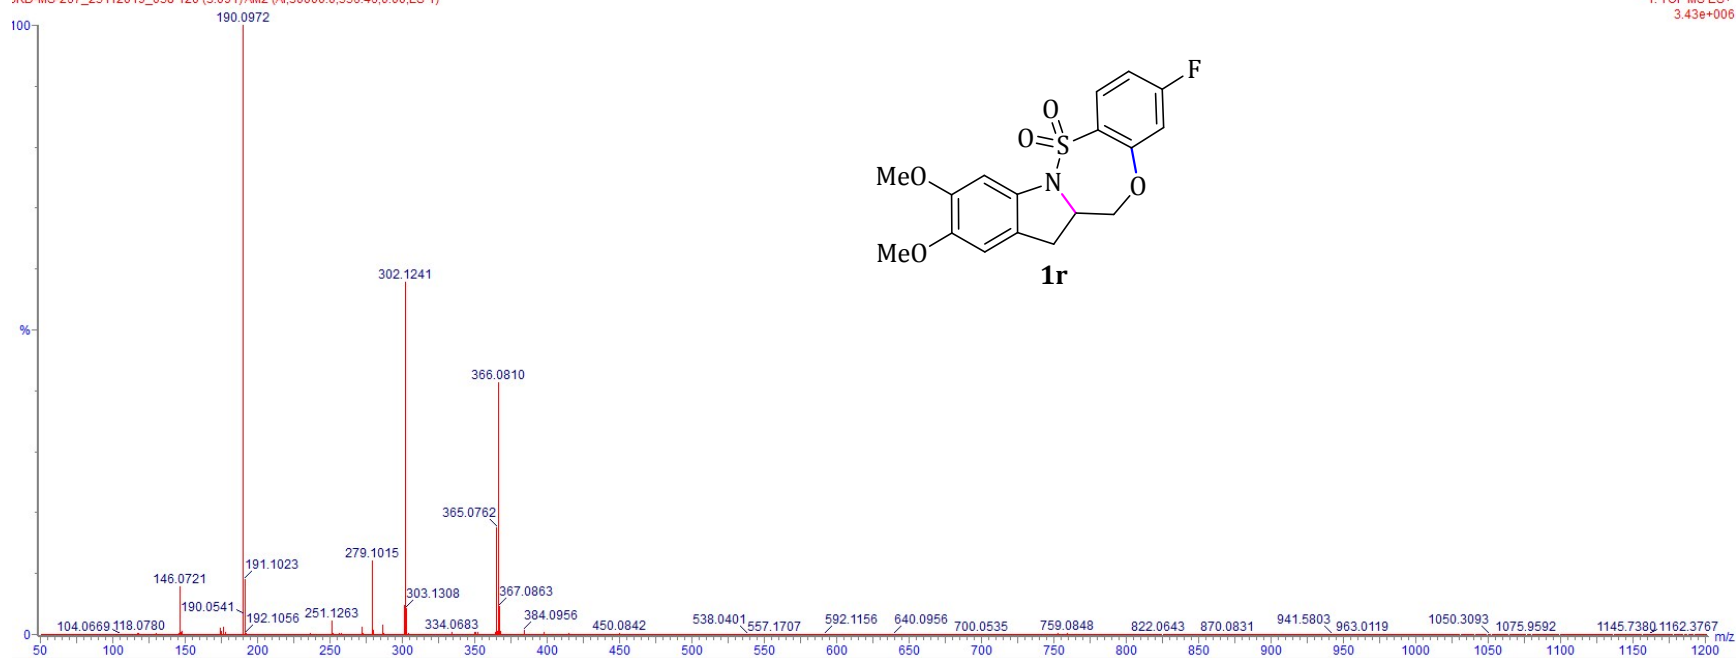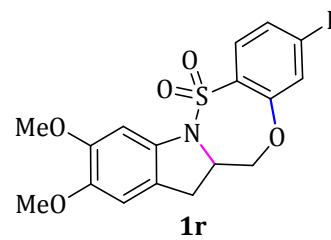

HRMS of compound 1r
